# Supplementary material for: The design and synthesis of green emissive iridium( iii ) complexes guided by calculations of the vibrationally-resolved emission spectra
Source: Royal Society of Chemistry journal article supplement (doi:10.1039/d3dt00304c), 2023-01-01
Supplement: d3dt00304c2.pdf [file d3dt00304c2.pdf]

# The design and synthesis of green emissive iridium(III) complexes guided by calculations of the vibrationally-resolved emission spectra

Campbell F.R. Mackenzie,<sup>a</sup> Seung-Yeon Kwak,<sup>b</sup> Sungmin Kim<sup>b</sup> and Eli Zysman-Colman\*<sup>a</sup>

<sup>a</sup> Organic Semiconductor Centre, EaStCHEM School of Chemistry, University of St Andrews, St Andrews, Fife, U.K., KY16 9ST, Fax: +44-1334 463808; Tel: +44-1334 463826;

E-mail: [eli.zysman-colman@st-andrews.ac.uk](mailto:eli.zysman-colman@st-andrews.ac.uk);

URL: <http://www.zysman-colman.com>

<sup>b</sup> Samsung Advanced Institute of Technology, Samsung Electronics Co. Ltd., Suwon, Gyeonggi-do 16678, Republic of Korea.

## Supplementary Information

### Table of Contents

|                            |     |
|----------------------------|-----|
| General Experimental ..... | S2  |
| Synthesis .....            | S4  |
| NMR Spectra .....          | S11 |
| HPLC Traces.....           | S24 |
| HRMS .....                 | S33 |
| Photophysics .....         | S38 |
| DFT Calculations .....     | S45 |
| References.....            | S66 |

## General Experimental

**General Synthetic Considerations.** All reactions were performed using standard Schlenk techniques under an inert (N<sub>2</sub>) atmosphere. No special precautions were taken to exclude air and moisture during reaction workup and purification. The starting materials 2-bromo-4-trimethylsilyl-pyridine and 2-bromo-5-trimethylsilyl-pyridine were prepared from their respective di-bromo-pyridine precursors according to a literature method.<sup>1</sup> All other chemicals were obtained from commercial suppliers and used as received.

**NMR Spectroscopy.** <sup>1</sup>H, <sup>13</sup>C and <sup>29</sup>Si spectra were recorded on a Bruker AVANCE II 400 spectrometer equipped with a BBFO probe (400 MHz for <sup>1</sup>H; 101 MHz for <sup>13</sup>C; 79 MHz for <sup>29</sup>Si). <sup>13</sup>C and <sup>29</sup>Si NMR spectra were recorded with proton decoupling. <sup>1</sup>H and <sup>13</sup>C NMR spectra were referenced relative to residual solvent peaks, the <sup>29</sup>Si spectra were referenced externally to tetramethylsilane (TMS) ( $\delta = 0$  ppm). The following abbreviations have been used for multiplicity assignments: “s” for singlet, “d” for doublet, “t” for triplet, “dd” for doublet of doublets, and “m” for multiplet.

### **Melting Point**

Melting points were measured using open-ended capillaries on an Electrothermal 1101D Mel-Temp apparatus and are uncorrected.

### **HPLC**

HPLC traces were recorded on a Shimadzu Nexera LC-40 HPLC system. A Shim-pack GIST 3 $\mu$ m C18 column (3.0 x 150 mm) was used with acetonitrile/water as the mobile phase.

### **Mass Spectrometry**

Mass spectra were measured in positive ion electrospray ionisation (ESI<sup>+</sup>) mode on a ThermoScientific LCQ instrument by the St Andrews Mass Spectrometry facility.

### **Electrochemistry**

Cyclic voltammetry (CV) and Differential Pulse Voltammetry were carried out on a CHI620E voltammetric analyser at room temperature with a conventional three-electrode configuration consisting of a platinum disk working electrode, a platinum wire auxiliary electrode and a non-aqueous Ag/AgCl reference electrode. Acetonitrile purged with solvent-saturated nitrogen was used as the solvent, with tetrabutylammonium hexafluorophosphate (TBAPF<sub>6</sub>, 0.1M) used as the supporting electrolyte. The cyclic voltammograms were obtained at a scan rate of 100 mV s<sup>-1</sup>. DPV was conducted with an increment potential of 0.01 V and a pulse amplitude, width, and period of 50 mV, 0.06, and 0.5 s, respectively. The redox potentials

are reported relative to a saturated calomel electrode (SCE) with ferrocene/ferricenium (Fc/Fc<sup>+</sup>) used as the internal standard (0.38 V vs SCE).<sup>2</sup>

### ***Absorption Spectroscopy***

Solutions for absorption spectrometry were prepared in spectroscopic grade toluene (dichloromethane for IrPic) with concentrations in the range  $1.39 \times 10^{-4}$  to  $2.78 \times 10^{-5}$  M. Absorption spectra were recorded at room temperature on a Shimadzu UV-2600 double beam spectrophotometer with a 1 cm quartz cuvette. Molar absorptivity determination was verified by linear regression analysis of values obtained from 4 independent solutions at varying concentrations.

### ***Photophysics***

For emission studies, degassed solutions were prepared via three freeze-pump-thaw cycles in a custom made Schlenk cuvette. Steady-state emission, excitation spectra and time-resolved emission spectra were recorded at 298 K using an Edinburgh Instruments FS5. Emission spectra were excited at 400 nm using a Xenon lamp, excitation spectra were recorded while measuring emission at 510 nm. Emission lifetimes were determined using the time correlated single photon counting (TCSPC) technique, the samples were excited at 378 nm by a pulsed laser diode (Picoquant, model PLS 370).

Doped films were prepared from solutions of emitter (10% w/w) and host (90% w/w) in chlorobenzene (chloroform for IrPic) by spin-coating on a quartz substrate. Emission spectra and time-resolved emission spectra were measured at 298 K in a vacuum of  $< 2 \times 10^{-4}$  mbar on an Edinburgh Instruments F980. Emission spectra were excited at 340 nm. Emission lifetimes were determined using the time correlated single photon counting (TCSPC) technique, the samples were excited at 378 nm by a pulsed laser diode (Picoquant, model PLS 370). Quantum yields of the thin film samples were measured using an integrating sphere attached to an Edinburgh Instruments FS5 fluorimeter, the samples were purged with nitrogen and excited at 340 nm for the measurement of quantum yields, values are reported to the nearest % with an estimated experimental uncertainty of  $\pm 5\%$ .

## Synthesis

### Synthesis of Ligands

**General Procedure.** 2-Bromopyridine (1.00 g, 6.33 mmol, 1.0 equiv.) and 3-trimethylsilylphenylboronic acid (1.47 g, 7.59 mmol, 1.2 equiv.) were dissolved in tetrahydrofuran (THF) (50 mL). A solution of 2 M  $K_2CO_3$  (5 mL) was added, and the mixture was degassed by bubbling with nitrogen before the addition of  $Pd(PPh_3)_4$  (366 mg, 0.31 mmol, 5 mol%). The reaction mixture was heated to reflux under an inert atmosphere for 16 h. After being cooled, the mixture was quenched with aqueous 1 M HCl (25 mL) before being neutralised with aqueous  $K_2CO_3$  (2M) and extracted with DCM ( $3 \times 25$  mL). The combined organic layers were dried over  $MgSO_4$  and the solvent was removed under reduced pressure to give a dark yellow oil. The crude oil was purified by column chromatography (2.5% EtOAc in hexane on Silica).

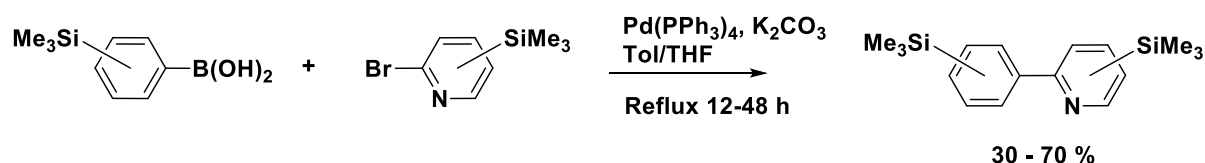

**Figure 1.** General conditions for the Suzuki coupling to form phenyl-pyridine ligands.

**C3Sippy:** Product was obtained as a pale-yellow oil. **Yield:** 15%.  $^1H$  NMR (400 MHz,  $CDCl_3$ ,  $\delta$  ppm): 8.72 (m, 1H), 8.12 (s, 1H), 7.94 (m, 1H), 7.75 (m, 2H), 7.59 (m, 1H), 7.47 (t,  $J = 7.5$  Hz, 1H), 7.31 (m, 1H), 7.24 (m, 1H), 0.32 (s, 9H).  $^{13}C\{^1H\}$  NMR (101 MHz,  $CDCl_3$ ,  $\delta$  ppm): 158.1, 149.8, 141.2, 138.8, 136.9, 134.1, 131.9, 128.8, 127.7, 122.1, 121.0, -0.9.  $^{29}Si\{^1H\}$  NMR (76 MHz,  $CDCl_3$ ,  $\delta$  ppm): -3.5. HR-MS:  $[M+H]^+$  Calculated for  $C_{14}H_{18}NSi$ , 228.1209, **Found**, 228.1195.

**C4Sippy:** Product was obtained as a colourless oil that solidified upon standing to a white solid. **Yield:** 47%.  $^1H$  NMR (400 MHz,  $CDCl_3$ ,  $\delta$  ppm): 8.70 (m, 1H), 7.97 (d,  $J = 8.3$  Hz, 2H), 7.74 (m, 2H), 7.64 (d,  $J = 8.3$  Hz, 2H), 7.23 (m, 1H), 0.30 (s, 9H) ppm.  $^{13}C\{^1H\}$  NMR (101 MHz,  $CDCl_3$ ,  $\delta$  ppm): 157.6, 149.8, 141.6, 139.8, 136.9, 133.9, 126.2, 122.3, 120.7, -1.0.  $^{29}Si\{^1H\}$  NMR (76 MHz,  $CDCl_3$ ,  $\delta$  ppm): -3.8. HR-MS:  $[M+H]^+$  Calculated for  $C_{14}H_{18}NSi$ , 228.1209, **Found**, 228.1195.

**N4Sippy:** Product was obtained as a colourless oil. **Yield:** 39%.  $^1H$  NMR (400 MHz,  $CDCl_3$ ,  $\delta$  ppm): 8.66 (dd,  $J = 4.7$  and  $1.0$  Hz, 1H), 7.98 (m, 2H), 7.81 (*pseudo*-triplet (dd),  $J = 1.0$ Hz, 1H), 7.48 (m, 2H), 7.43 (m, 1H), 7.33 (dd,  $J = 4.6$  and  $1.0$  Hz, 1H), 0.33 (s, 9H).  $^{13}C\{^1H\}$

**NMR (101 MHz, CDCl<sub>3</sub>, δ ppm):** 156.4, 151.2, 148.7, 140.0, 128.9, 128.8, 127.2, 126.7, 125.2, -1.5. **<sup>29</sup>Si{<sup>1</sup>H} NMR (76 MHz, CDCl<sub>3</sub>, δ ppm):** -2.9. **HR-MS: [M+H]<sup>+</sup> Calculated for C<sub>14</sub>H<sub>18</sub>NSi, 228.1209, Found, 228.1200.**

**N5Sippy:** Product was obtained as a pale-yellow oil. **Yield:** 27%. **<sup>1</sup>H NMR (400 MHz, CDCl<sub>3</sub>, δ ppm):** 8.77 (m, 1H), 8.00 (m, 1H), 7.86 (dd, J = 7.8 and 1.8 Hz, 1H), 7.71 (dd, J = 7.8 and 1.1 Hz, 1H), 7.48 (m, 2H), 7.43 (m, 1H), 0.33 (s, 9H). **<sup>13</sup>C{<sup>1</sup>H} NMR (101 MHz, CDCl<sub>3</sub>, δ ppm):** 157.6, 154.0, 142.1, 139.6, 133.3, 129.1, 128.9, 127.0, 112.0, -1.1. **<sup>29</sup>Si{<sup>1</sup>H} NMR (76 MHz, CDCl<sub>3</sub>, δ ppm):** -4.0. **HR-MS: [M+H]<sup>+</sup> Calculated for C<sub>14</sub>H<sub>18</sub>NSi, 228.1209, Found, 228.1197.**

**C3N4Si<sub>2</sub>ppy:** Product was obtained as a colourless oil that solidified upon standing to a white solid. **Yield:** 66%. **<sup>1</sup>H NMR (400 MHz, CDCl<sub>3</sub>, δ ppm):** 8.66 (dd, J = 4.8 and 1.0 Hz, 1H), 8.11 (s, 1H), 7.90 (m, 1H), 7.78 (*pseudo*-triplet (dd), J = 1.0 Hz, 1H), 7.58 (m, 1H), 7.47 (m, 1H), 7.34 (dd, J = 4.8 and 1.0 Hz, 1H), 0.33 (s, 9H), 0.32 (s, 9H). **<sup>13</sup>C{<sup>1</sup>H} NMR (101 MHz, CDCl<sub>3</sub>, δ ppm):** 157.0, 151.1, 148.7, 141.1, 139.3, 133.9, 132.1, 128.2, 127.8, 126.6, 125.5, -0.9, -1.5. **<sup>29</sup>Si{<sup>1</sup>H} NMR (76 MHz, CDCl<sub>3</sub>, δ ppm):** -2.9, -3.6. **HR-MS: [M+H]<sup>+</sup> Calculated for C<sub>17</sub>H<sub>26</sub>NSi<sub>2</sub>, 300.1604, Found, 300.1588.**

**C3N5Si<sub>2</sub>ppy:** Product was obtained as a pale-yellow oil. **Yield:** 34%. **<sup>1</sup>H NMR (400 MHz, CDCl<sub>3</sub>, δ ppm):** 8.79 (m, 1H), 8.13 (s, 1H), 7.95 (m, 1H), 7.86 (dd, J = 7.8 and 1.8 Hz, 1H), 7.70 (dd, J = 7.8 and 1.0 Hz, 1H), 7.58 (m, 1H), 7.47 (m, 1H), 0.33 (s, 9H), 0.32 (s, 9H). **<sup>13</sup>C{<sup>1</sup>H} NMR (101 MHz, CDCl<sub>3</sub>, δ ppm):** 158.1, 154.0, 142.0, 141.1, 138.9, 134.1, 133.1, 131.9, 128.2, 127.6, 120.3, -0.9, -1.1. **<sup>29</sup>Si{<sup>1</sup>H} NMR (76 MHz, CDCl<sub>3</sub>, δ ppm):** -3.5, -4.0. **HR-MS: [M+H]<sup>+</sup> Calculated for C<sub>17</sub>H<sub>26</sub>NSi<sub>2</sub>, 300.1604, Found, 300.1592.**

**C4N4Si<sub>2</sub>ppy:** Product was obtained as a colourless oil. **Yield:** 51%. **<sup>1</sup>H NMR (400 MHz, CDCl<sub>3</sub>, δ ppm):** 8.65 (dd, J = 4.7 and 1.1 Hz, 1H), 7.95 (d, J = 8.3 Hz, 2H), 7.85 (*pseudo*-triplet (dd), J = 1.0 Hz, 1H), 7.64 (d, J = 8.4 Hz, 2H), 7.33 (m, 1H), 0.33 (s, 9H), 0.30 (s, 9H). **<sup>13</sup>C{<sup>1</sup>H} NMR (101 MHz, CDCl<sub>3</sub>, δ ppm):** 156.5, 151.1, 148.7, 141.3, 140.3, 133.9, 126.7, 126.4, 125.3, -1.0, -1.5. **<sup>29</sup>Si{<sup>1</sup>H} NMR (76 MHz, CDCl<sub>3</sub>, δ ppm):** -2.9, -3.9. **HR-MS: [M+H]<sup>+</sup> Calculated for C<sub>17</sub>H<sub>26</sub>NSi<sub>2</sub>, 300.1604, Found, 300.1588.**

**C4N5Si<sub>2</sub>ppy:** Product was obtained as a colourless oil that solidified upon standing to a white solid. **Yield:** 19%. **<sup>1</sup>H NMR (400 MHz, CDCl<sub>3</sub>, δ ppm):** 8.77 (s, 1H), 7.98 (d, J = 8.4 Hz, 2H), 7.85 (dd, J = 7.9 and 1.9 Hz, 1H), 7.70 (dd, J = 7.9 and 0.9 Hz, 1H), 7.63 (d, J = 8.3 Hz, 2H), 0.33 (s, 9H), 0.30 (s, 9H). **<sup>13</sup>C{<sup>1</sup>H} NMR (101 MHz, CDCl<sub>3</sub>, δ ppm):** 157.6, 154.1, 142.0, 141.6, 139.9, 133.9, 133.3, 136.2, 126.2, 120.1, -1.0, -1.1. **<sup>29</sup>Si{<sup>1</sup>H} NMR (76 MHz,**

$\text{CDCl}_3$ ,  $\delta$  ppm): -3.8, -4.0. HR-MS:  $[\text{M}+\text{H}]^+$  Calculated for  $\text{C}_{17}\text{H}_{26}\text{NSi}_2$ , 300.1604, Found, 300.1596.

### Synthesis of Iridium Dimers

**General Procedure.**  $[\text{Ir}(\text{COD})\text{Cl}]_2$  (200 mg, mmol) and silylated ppyH ligand (4.4 equiv.) were suspended in a mixture of 2-ethoxyethanol and water (3:1, 8 mL). The mixture was degassed by bubbling with nitrogen for 5 minutes, before heating to  $120^\circ\text{C}$  for 24 hrs under an inert atmosphere. The mixture was cooled to room temperature before the addition of water (10 mL) and DCM (25 mL). The layers were separated, and the aqueous layer was extracted with DCM ( $2 \times 25$  mL). The combined organic layers were dried ( $\text{MgSO}_4$ ), and the solvent was removed under vacuum to give a yellow solid. The crude dimer was used as-is for the next reaction without purification.

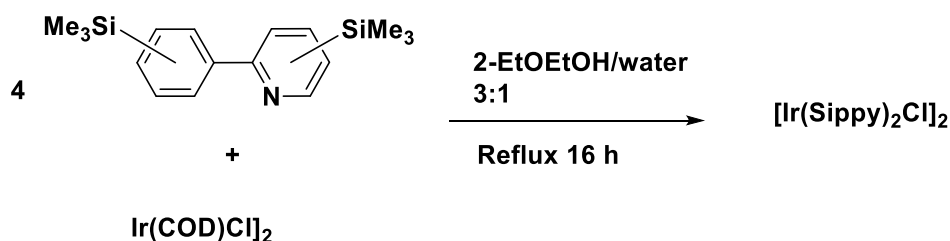

**Figure 2.** General conditions for the synthesis of the Iridium dimers.

$[\text{Ir}(\text{C3Sippy})_2\text{Cl}]_2$ : The product was obtained as a bright yellow solid in 96% yield.

$[\text{Ir}(\text{C4Sippy})_2\text{Cl}]_2$ : The product was obtained as a bright yellow solid in 90% yield.

$[\text{Ir}(\text{N4Sippy})_2\text{Cl}]_2$ : The product was obtained as a bright yellow solid in 94% yield

$[\text{Ir}(\text{N5Sippy})_2\text{Cl}]_2$ : The product was obtained as a bright yellow solid in 89% yield

$[\text{Ir}(\text{C3N4Si}_2\text{ppy})_2\text{Cl}]_2$ : The product was obtained as a bright yellow solid in 74% yield.

$[\text{Ir}(\text{C3N5Si}_2\text{ppy})_2\text{Cl}]_2$ : The product was obtained as a bright yellow solid in 45% yield.

$[\text{Ir}(\text{C4N4Si}_2\text{ppy})_2\text{Cl}]_2$ : The product was obtained as a bright yellow solid in 83% yield.

$[\text{Ir}(\text{C4N5Si}_2\text{ppy})_2\text{Cl}]_2$ : The product was obtained as a bright yellow solid in 54% yield.

### Synthesis of Complexes

**General Procedure.** A schlenk flask was charged with iridium dimer (200 mg), sodium carbonate (10 equiv.), picolinic acid (4.4 equiv.) and 1,2-dimethoxyethane (5 mL). The mixture was purged with nitrogen and heated to reflux overnight and then cooled to room temperature. 10 mL of water and 25 mL of DCM were added, the layers were separated, and the aqueous layer was extracted with DCM ( $2 \times 25$  mL). The combined organic layers were dried ( $\text{MgSO}_4$ )

and the solvent removed under vacuum to give a yellow solid. The crude product was purified by column chromatography (EtOAc/MeOH/DCM on Silica) and recrystallised from DCM/hexanes.

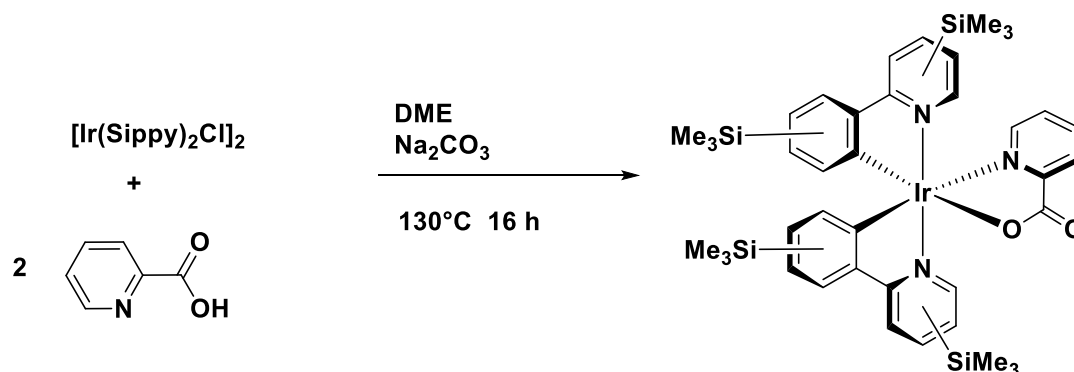

**Figure 3.** General conditions for the synthesis of the iridium complexes.

**[Ir(ppy)<sub>2</sub>(pic)] (IrPic):** The product was obtained using 45% EtOAc and 5% MeOH in DCM as the mobile phase to give a bright yellow solid. The spectroscopic characterisation matches the previously reported data.<sup>3</sup> **Yield:** 87%. **M.p.:** >380 °C. **R<sub>f</sub> (5:45:50 MeOH:EtOAc:DCM on silica):** 0.42. **<sup>1</sup>H NMR (400 MHz, CDCl<sub>3</sub>, δ):** 8.78 (d, 1H), 8.32 (d, 1H), 7.89-7.82 (m, 3H), 7.77 (d, H), 7.70 (m, 2H), 7.60 (m, 2H), 7.47 (d, 2H), 7.33 (m, 1H), 7.13 (m, 1H), 6.95-6.73 (m, 5H), 6.41 (d, 1H), 6.18 (d, 1H). **<sup>13</sup>C{<sup>1</sup>H} NMR (101 MHz, CDCl<sub>3</sub>, δ):** 173.0, 169.4, 167.8, 149.3, 149.1, 148.6, 148.2, 147.6, 144.3, 144.2, 137.7, 137.3, 137.2, 132.7, 132.6, 130.2, 129.7, 128.4, 128.1, 124.5, 124.2, 122.3, 122.1, 121.7, 121.2, 119.2, 118.6. **HR-MS: [M+H]<sup>+</sup> Calculated for C<sub>28</sub>H<sub>21</sub>IrN<sub>3</sub>O<sub>2</sub>, 624.1263, Found, 624.1247.**

**[Ir(C3Sippy)<sub>2</sub>(pic)] (C3):** The product was obtained using 45% EtOAc and 5% MeOH in DCM as the mobile phase to give a bright yellow solid. **Yield:** 58%. **M.p.:** 239-241 °C. **R<sub>f</sub> (5:45:50 MeOH:EtOAc:DCM on silica):** 0.53. **<sup>1</sup>H NMR (400 MHz, CDCl<sub>3</sub>, δ):** 8.77 (d, 1H), 8.31 (d, 1H), 7.94 (d, 1H), 7.87 (m, 3H), 7.76 (d, 1H), 7.69 (m, 2H), 7.54 (t, 1H), 7.46 (m, 2H), 7.35 (t, 1H), 7.12 (t, 1H), 6.91 (m, 3H), 6.45 (d, 1H), 6.23 (d, 1H), 0.22 (s, 9H), 0.17 (s, 9H) ppm. **<sup>13</sup>C{<sup>1</sup>H} NMR (101 MHz, CDCl<sub>3</sub>, δ):** 172.9, 169.4, 167.8, 152.3, 151.1, 149.3, 149.1, 148.6, 148.2, 144.1, 143.9, 137.7, 137.2, 137.1, 135.1, 134.6, 131.5, 131.0, 129.3, 129.1, 128.7, 128.6, 128.3, 128.1, 122.2, 122.0, 119.2, 118.5, -0.8, -0.9 ppm. **<sup>29</sup>Si{<sup>1</sup>H} NMR (76 MHz, CDCl<sub>3</sub>, δ):** -4.5, -4.6 ppm. **HR-MS: [M+H]<sup>+</sup> Calculated for C<sub>34</sub>H<sub>37</sub>IrN<sub>3</sub>O<sub>2</sub>Si<sub>2</sub>, 768.2054, Found, 768.2037.**

**[Ir(C4Sippy)<sub>2</sub>(pic)] (C4):** The product was obtained using 45% EtOAc and 5% MeOH in DCM as the mobile phase to give a bright yellow solid. **Yield:** 66%. **M.p.:** 243-245 °C. **R<sub>f</sub> (5:45:50 MeOH:EtOAc:DCM on silica):** 0.50. **<sup>1</sup>H NMR (400 MHz, CDCl<sub>3</sub>, δ):** 8.84 (d, 1H), 8.32 (d, 1H), 7.85 (m, 3H), 7.70 (m, 3H), 7.52 (m, 3H), 7.32 (m, 1H), 7.14 (m, 1H), 7.05 (d, 1H), 6.96 (d, 1H), 6.93 (m, 1H), 6.55 (s, 1H), 6.34 (s, 1H), 0.36 (s, 9H), 0.35 (s, 9H) ppm. **<sup>13</sup>C{<sup>1</sup>H} NMR (101 MHz, CDCl<sub>3</sub>, δ):** 173.1, 169.7, 168.2, 152.4, 149.4, 148.4, 148.2, 148.0, 146.6, 144.8, 144.7, 142.7, 141.7, 137.54, 137.47, 137.17, 137.15, 137.06, 128.3, 128.1, 126.5, 125.9, 123.3, 123.1, 122.1, 121.9, 119.1, 118.5, -1.1, -1.2 ppm. **<sup>29</sup>Si{<sup>1</sup>H} NMR (76 MHz, CDCl<sub>3</sub>, δ):** -5.1, -5.2 ppm. **HR-MS: [M]<sup>+</sup> Calculated for C<sub>34</sub>H<sub>36</sub>IrN<sub>3</sub>O<sub>2</sub>Si<sub>2</sub>, 767.1975, Found, 767.1955.**

**[Ir(N4Sippy)<sub>2</sub>(pic)] (N4):** The product was obtained using 30% EtOAc in DCM as the mobile phase to give a bright yellow solid. **Yield:** 83%. **M.p.:** 365-367 °C. **R<sub>f</sub> (20% EtOAc in DCM on silica):** 0.29. **<sup>1</sup>H NMR (400 MHz, CDCl<sub>3</sub>, δ):** 8.71 (d, 1H), 8.31 (d, 1H), 7.96 (s, 1H), 7.91 (s, 1H), 7.85 (m, 1H), 7.76 (d, 1H), 7.65 (m, 2H), 7.36 (d, 1H), 7.30 (m, 1H), 7.17 (d, 1H), 6.98 (d, 1H), 6.93 (m, 1H), 6.85 (m, 1H), 6.80 (m, 1H), 6.74 (m, 1H), 6.45 (d, 1H), 6.18 (d, 1H), 0.22 (s, 9H), 0.17 (s, 9H) ppm. **<sup>13</sup>C{<sup>1</sup>H} NMR (101 MHz, CDCl<sub>3</sub>, δ):** 173.0, 167.3, 165.8, 152.4, 152.0, 149.4, 148.6, 147.8, 147.6, 146.5, 144.3, 144.2, 137.5, 132.8, 132.6, 129.9, 129.4, 128.3, 128.0, 126.7, 126.5, 124.3, 124.0, 123.5, 122.9, 121.5, 121.0, -1.5, -1.6 ppm. **<sup>29</sup>Si{<sup>1</sup>H} NMR (76 MHz, CDCl<sub>3</sub>, δ):** -2.2 (2Si) ppm. **HR-MS: [M+H]<sup>+</sup> Calculated for C<sub>34</sub>H<sub>37</sub>IrN<sub>3</sub>O<sub>2</sub>Si<sub>2</sub>, 768.2054, Found, 768.2017.**

**[Ir(N5Sippy)<sub>2</sub>(pic)] (N5):** The product was obtained using 20% EtOAc in DCM as the mobile phase to give a bright yellow solid. **Yield:** 65%. **M.p.:** 254-256 °C. **R<sub>f</sub> (20% EtOAc in DCM on silica):** 0.47. **<sup>1</sup>H NMR (400 MHz, CDCl<sub>3</sub>, δ):** 8.82 (s, 1H), 8.32 (d, 1H), 7.88 (m, 1H), 7.78 (m, 5H), 7.63 (d, 1H), 7.57 (d, 1H), 7.32 (m, 2H), 6.92 (t, 1H), 6.78 (m, 3H), 6.39 (d, 1H), 6.20 (d, 1H), 0.29 (s, 9H), 0.06 (s, 9H) ppm. **<sup>13</sup>C{<sup>1</sup>H} NMR (101 MHz, CDCl<sub>3</sub>, δ):** 172.7, 169.2, 167.7, 152.7, 151.4, 149.8, 148.7, 148.3, 144.4, 142.0, 137.5, 134.6, 133.4, 132.7, 132.6, 130.1, 129.7, 128.1, 127.8, 124.4, 124.2, 121.6, 121.0, 118.4, 117.9, -1.2, -1.5 ppm. **<sup>29</sup>Si{<sup>1</sup>H} NMR (76 MHz, CDCl<sub>3</sub>, δ):** -3.3, -4.1 ppm. **HR-MS: [M+H]<sup>+</sup> Calculated for C<sub>34</sub>H<sub>37</sub>IrN<sub>3</sub>O<sub>2</sub>Si<sub>2</sub>, 768.2054, Found, 768.2024.**

**[Ir(C3N4Si<sub>2</sub>ppy)<sub>2</sub>(pic)] (C3N4):** The product was obtained using 20% EtOAc in DCM as the mobile phase to give a bright yellow solid. **Yield:** 44%. **M.p.:** 341-343 °C. **R<sub>f</sub> (20% EtOAc in DCM on silica):** 0.44. **<sup>1</sup>H NMR (400 MHz, CDCl<sub>3</sub>, δ):** 8.70 (d, 1H), 8.30 (d, 1H), 7.96 (s, 1H), 7.92 (s, 1H), 7.85 (m, 1H), 7.75 (d, 1H), 7.71 (d, 2H), 7.38 (d, 1H), 7.32 (m, 1H), 7.16 (d, 1H), 6.97 (d, 1H), 6.91 (m, 2H), 6.48 (d, 1H), 6.22 (d, 1H), 0.37 (s, 9H), 0.36 (s, 9H), 0.23 (s,



9H), 0.18 (s, 9H) ppm.  $^{13}\text{C}\{^1\text{H}\}$  NMR (101 MHz,  $\text{CDCl}_3$ ,  $\delta$ ): 172.9, 167.4, 165.9, 152.4, 152.0, 151.9, 151.4, 149.7, 148.6, 147.6, 146.6, 144.1, 143.9, 137.5, 134.9, 134.4, 132.4, 132.2, 131.3, 130.8, 129.0, 128.8, 128.2, 128.0, 126.5, 123.4, 122.7, -0.8, -0.9, -1.5, -1.6 ppm.  $^{29}\text{Si}\{^1\text{H}\}$  NMR (76 MHz,  $\text{CDCl}_3$ ,  $\delta$ ): -2.2 (2Si), -4.6, -4.7 ppm. HR-MS:  $[\text{M}+\text{H}]^+$  Calculated for  $\text{C}_{40}\text{H}_{53}\text{IrN}_3\text{O}_2\text{Si}_4$ , 912.2844, Found, 912.2828.

**[Ir(C3N5Si<sub>2</sub>ppy)<sub>2</sub>(pic)] (C3N5):** The product was obtained using 15% EtOAc in DCM as the mobile phase to give a bright yellow solid. Yield: 37%. M.p.: 228-230 °C. **R<sub>f</sub> (10% EtOAc in DCM on silica):** 0.24.  $^1\text{H}$  NMR (400 MHz,  $\text{CDCl}_3$ ,  $\delta$ ): 8.80 (s, 1H), 8.31 (d, 1H), 7.89-7.69 (m, 8H), 7.35 (m, 2H), 6.91 (m, 2H), 6.43 (d, 1H), 6.24 (d, 1H), 0.29 (s, 9H), 0.23 (s, 9H), 0.18 (s, 9H), 0.06 (s, 9H) ppm.  $^{13}\text{C}\{^1\text{H}\}$  NMR (101 MHz,  $\text{CDCl}_3$ ,  $\delta$ ): 172.6, 169.2, 167.7, 152.7, 151.6, 151.4, 150.0, 148.7, 144.3, 144.2, 141.9, 137.5, 135.0, 134.7, 134.5, 133.4, 132.4, 132.3, 131.4, 130.7, 129.3, 129.1, 128.2, 127.8, 118.4, 117.9, -0.8, -0.9, -1.1, -1.5 ppm.  $^{29}\text{Si}\{^1\text{H}\}$  NMR (76 MHz,  $\text{CDCl}_3$ ,  $\delta$ ): -3.3, -4.2, -4.6, -4.7 ppm. HR-MS:  $[\text{M}+\text{H}]^+$  Calculated for  $\text{C}_{40}\text{H}_{53}\text{IrN}_3\text{O}_2\text{Si}_4$ , 912.2844, Found, 912.2822.

**[Ir(C4N4Si<sub>2</sub>ppy)<sub>2</sub>(pic)] (C4N4):** The product was obtained using 20% EtOAc in DCM as the mobile phase to give a bright yellow solid. Yield: 43%. M.p.: 311-313 °C. **R<sub>f</sub> (10% EtOAc in DCM on silica):** 0.21.  $^1\text{H}$  NMR (400 MHz,  $\text{CDCl}_3$ ,  $\delta$ ): 8.77 (d, 1H), 8.32 (d, 1H), 7.94 (s, 1H), 7.90 (s, 1H), 7.85 (m, 1H), 7.74 (d, 1H), 7.54 (m, 2H), 7.47 (d, 1H), 7.21 (dd, 1H), 7.03 (m, 2H), 6.96 (dd, 1H), 6.48 (s, 1H), 6.24 (s, 1H), 0.36 (s, 9H), 0.35 (s, 9H), 0.02 (s, 9H), -0.04 (s, 9H) ppm.  $^{13}\text{C}\{^1\text{H}\}$  NMR (101 MHz,  $\text{CDCl}_3$ ,  $\delta$ ): 173.0, 167.8, 166.4, 152.5, 152.1, 152.0, 148.6, 148.2, 147.9, 146.8, 146.7, 144.9, 144.8, 142.3, 141.3, 137.4, 137.3, 128.2, 128.0, 126.5, 126.4, 126.3, 125.7, 123.4, 123.1, 122.9, 122.8, -1.1, -1.2, -1.5, -1.6 ppm.  $^{29}\text{Si}\{^1\text{H}\}$  NMR (76 MHz,  $\text{CDCl}_3$ ,  $\delta$ ): -2.2, -2.3, -5.2, -5.3 ppm. HR-MS:  $[\text{M}+\text{H}]^+$  Calculated for  $\text{C}_{40}\text{H}_{53}\text{IrN}_3\text{O}_2\text{Si}_4$ , 912.2844, Found, 912.2817.

**[Ir(C4N5Si<sub>2</sub>ppy)<sub>2</sub>(pic)] (C4N5):** The product was obtained using 15% EtOAc in DCM as the mobile phase to give a bright yellow solid. Yield: 62%. M.p.: 362-364 °C. **R<sub>f</sub> (10% EtOAc in DCM on silica):** 0.47.  $^1\text{H}$  NMR (400 MHz,  $\text{CDCl}_3$ ,  $\delta$ ): 8.88 (s, 1H), 8.32 (d, 1H), 7.88 (t, 1H), 7.84-7.72 (m, 5H), 7.55 (d, 1H), 7.52 (d, 1H), 7.41 (s, 1H), 7.35 (t, 1H), 7.04 (d, 1H), 6.99 (d, 1H), 6.54 (s, 1H), 6.35 (s, 1H), 0.31 (s, 9H), 0.07 (s, 9H), 0.03 (s, 9H), -0.02 (s, 9H) ppm.  $^{13}\text{C}\{^1\text{H}\}$  NMR (101 MHz,  $\text{CDCl}_3$ ,  $\delta$ ): 172.8, 169.5, 168.0, 153.0, 152.8, 151.5, 148.7, 148.4, 147.3, 145.1, 145.0, 142.6, 141.9, 141.8, 141.7, 137.5, 137.4, 137.2, 134.6, 133.5, 128.2, 127.8, 126.5, 125.7, 123.3, 123.2, 118.4, 117.9, -1.0, -1.1, -1.2, -1.5 ppm.  $^{29}\text{Si}\{^1\text{H}\}$  NMR (76 MHz,  $\text{CDCl}_3$ ,  $\delta$ ): -3.3, -4.1, -5.2, -5.3 ppm. HR-MS:  $[\text{M}+\text{H}]^+$  Calculated for  $\text{C}_{40}\text{H}_{53}\text{IrN}_3\text{O}_2\text{Si}_4$ , 912.2844, Found, 912.2819.



# NMR Spectra

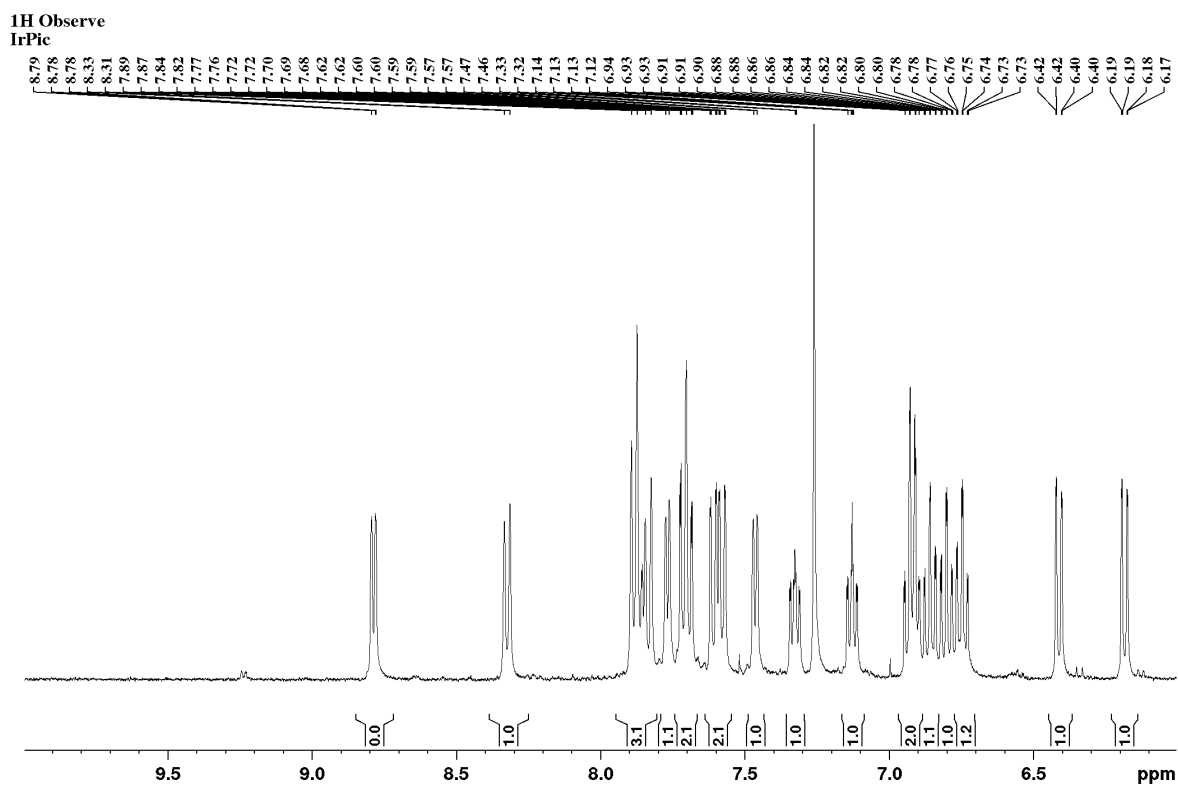

Figure 4. 400 MHz  $^1\text{H}$  NMR Spectra of Irpic in  $\text{CDCl}_3$ .

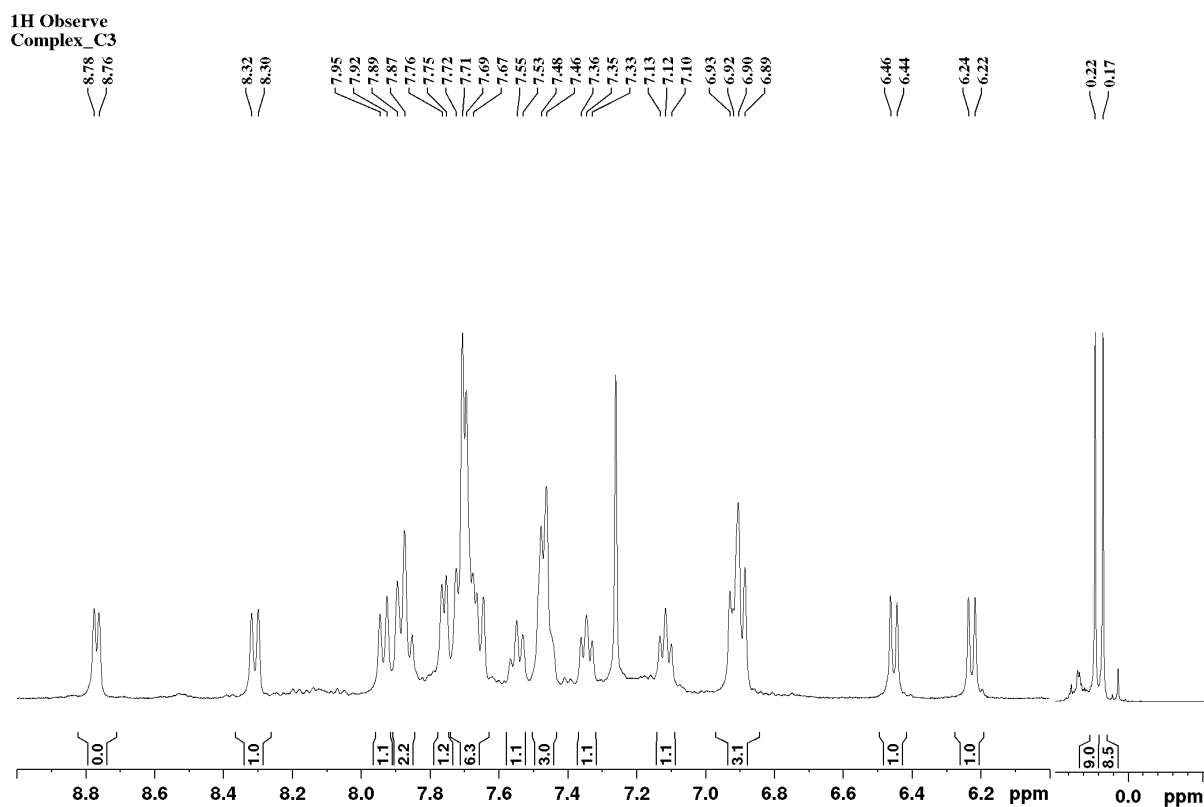

Figure 5. 400 MHz  $^1\text{H}$  NMR Spectra of C3 in  $\text{CDCl}_3$ .

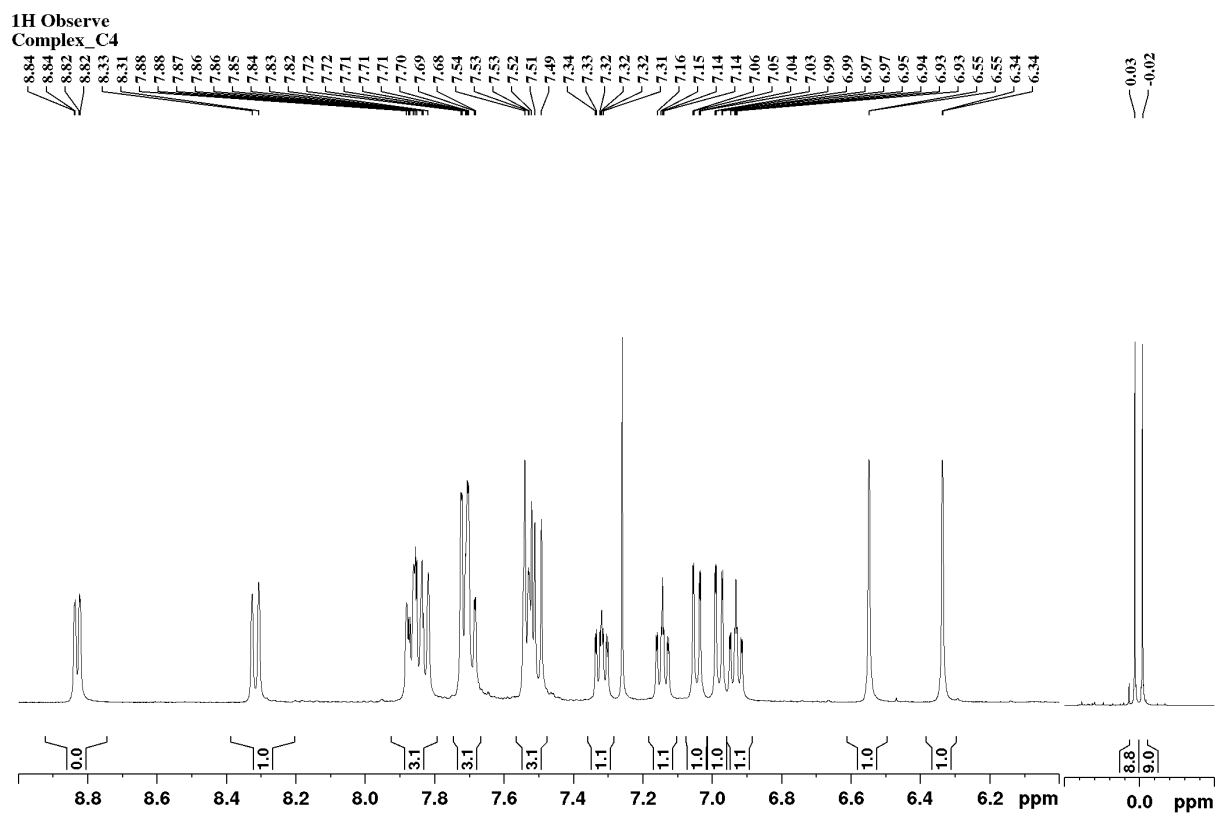

Figure 6. 400 MHz  $^1\text{H}$  NMR Spectra of C3 in  $\text{CDCl}_3$ .

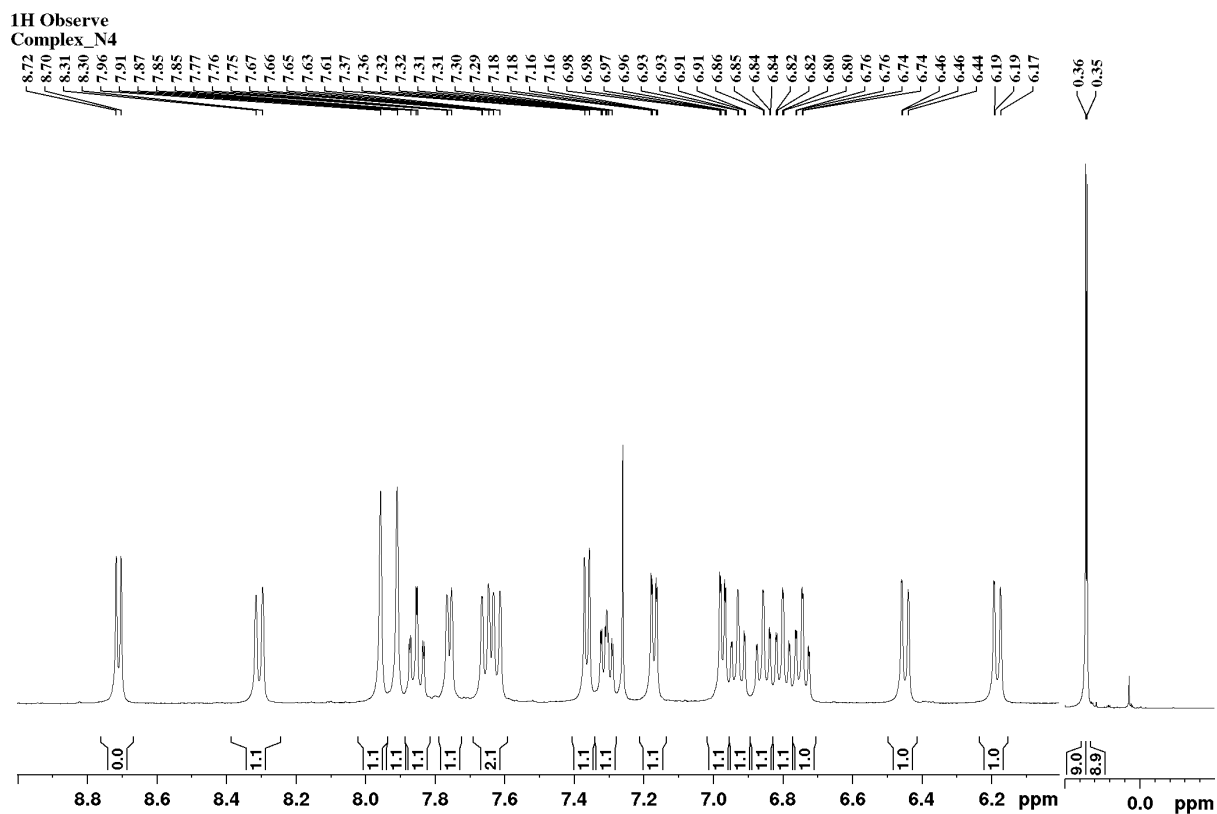

Figure 7. 400 MHz  $^1\text{H}$  NMR Spectra of N4 in  $\text{CDCl}_3$ .

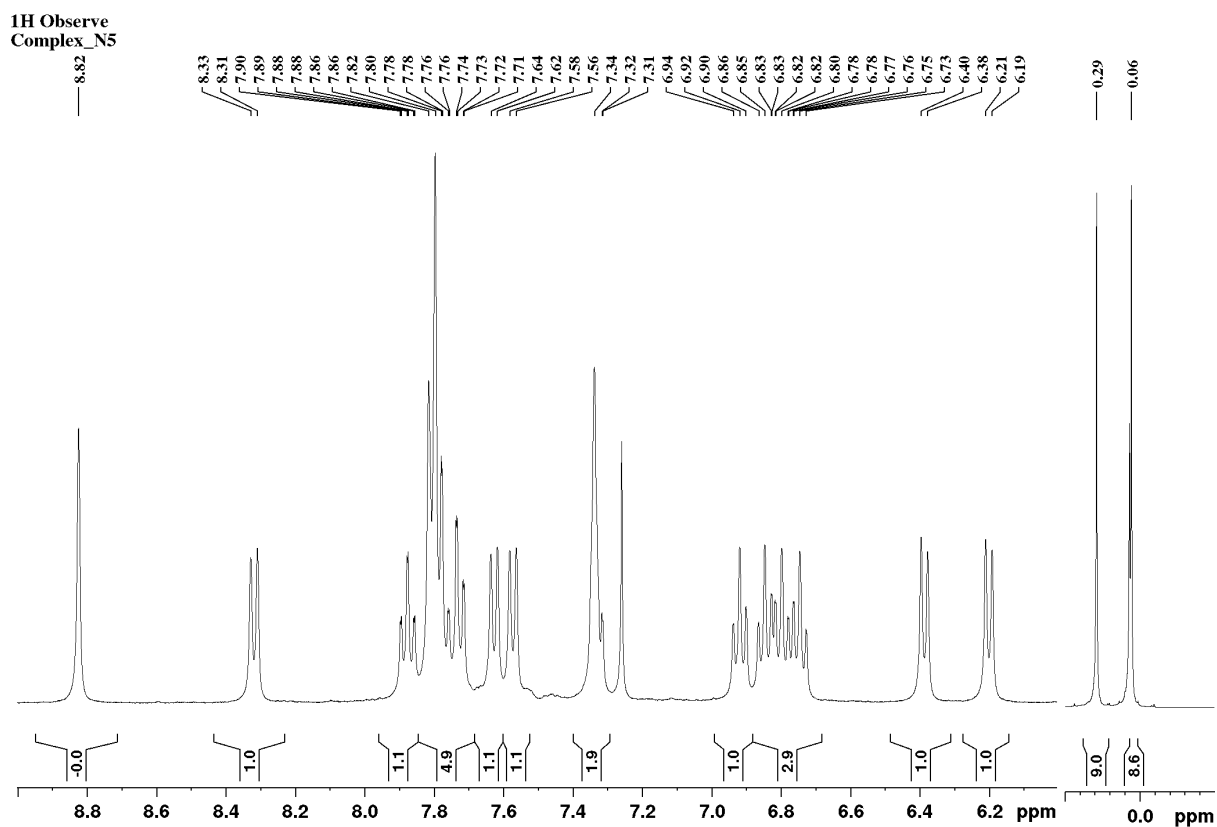

Figure 8. 400 MHz <sup>1</sup>H NMR Spectra of N5 in CDCl<sub>3</sub>.

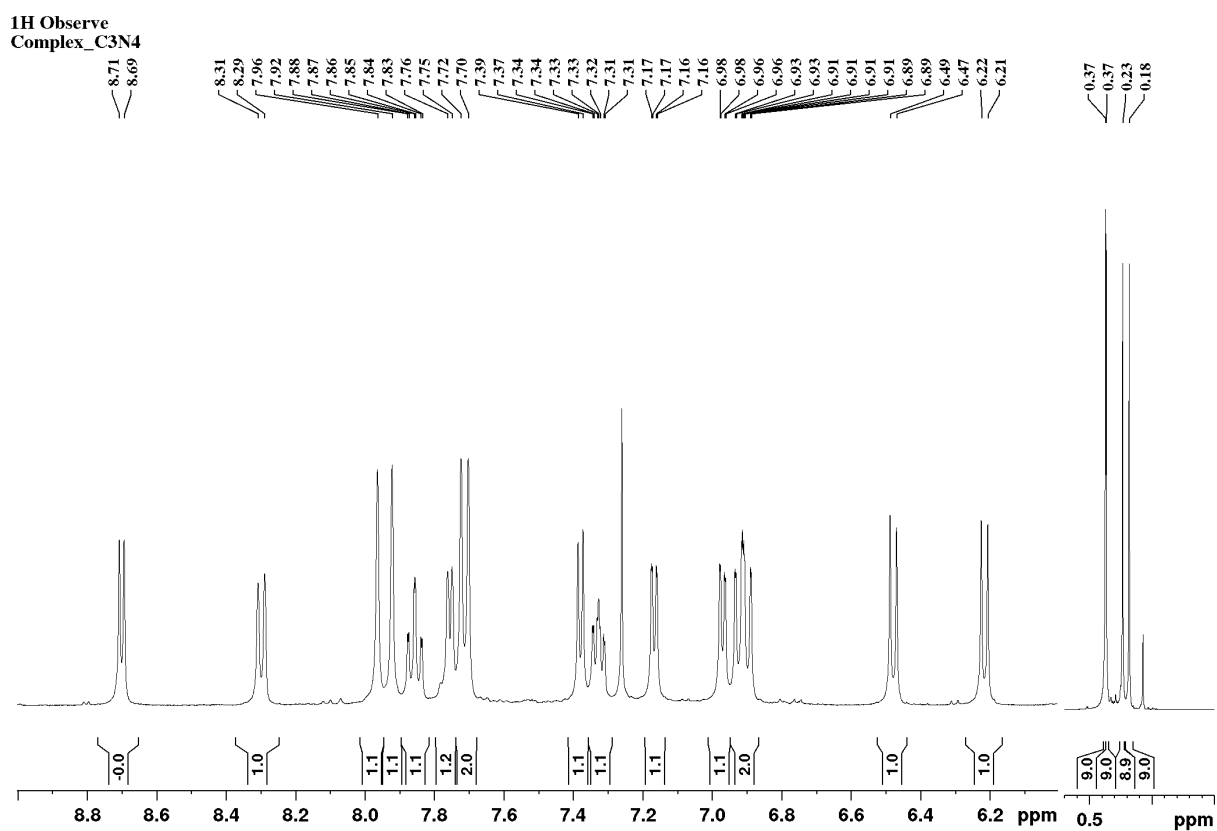

Figure 9. 400 MHz <sup>1</sup>H NMR Spectra of C3N4 in CDCl<sub>3</sub>.

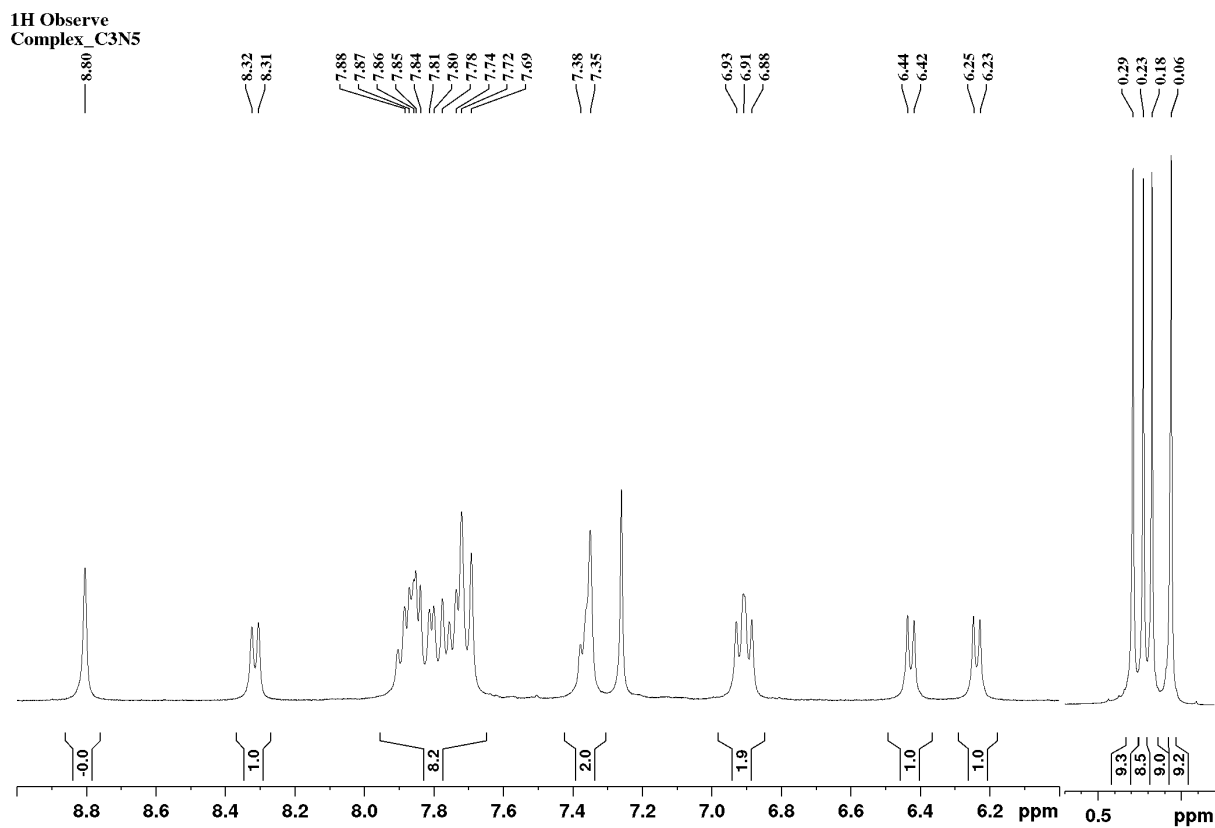

Figure 10. 400 MHz  $^1\text{H}$  NMR Spectra of C3N5 in  $\text{CDCl}_3$ .

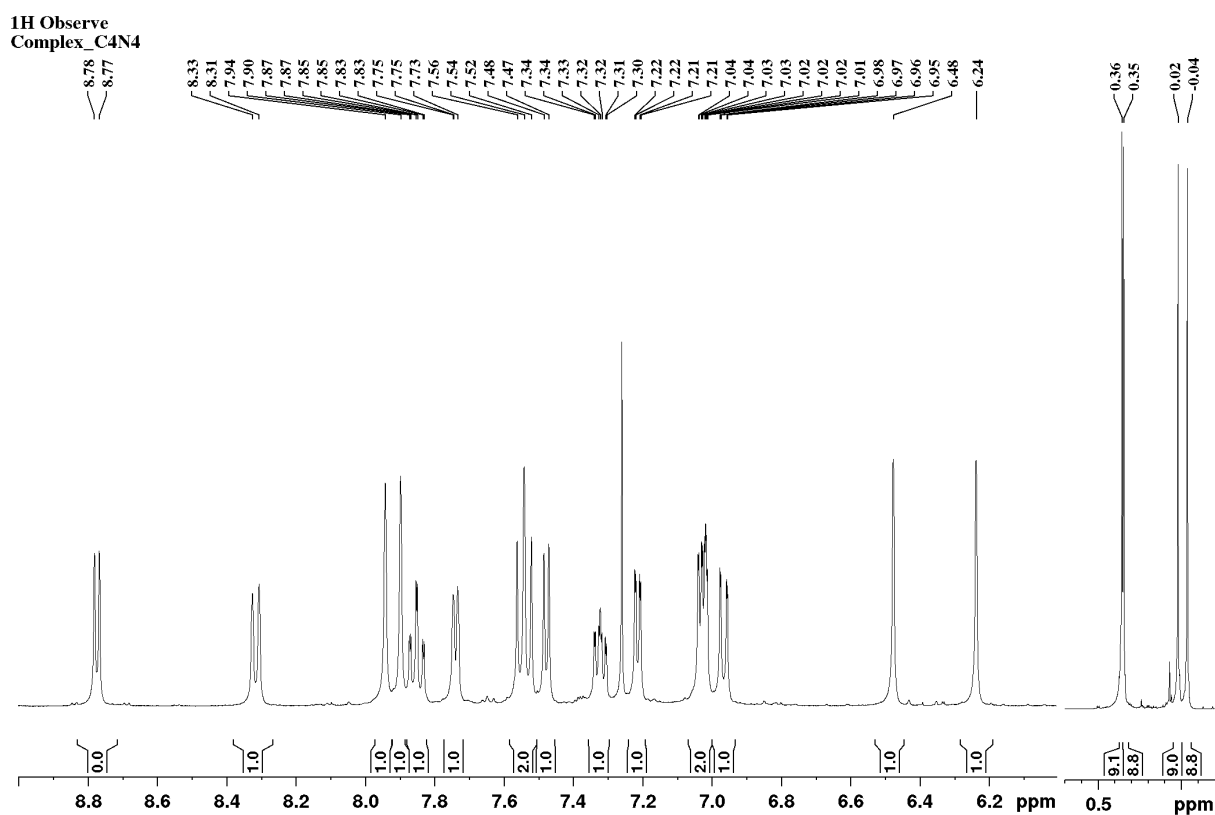

Figure 11. 400 MHz  $^1\text{H}$  NMR Spectra of C4N4 in  $\text{CDCl}_3$ .



**<sup>13</sup>C Observe with <sup>1</sup>H decoupling - D1 = 2s  
Complex\_C3**

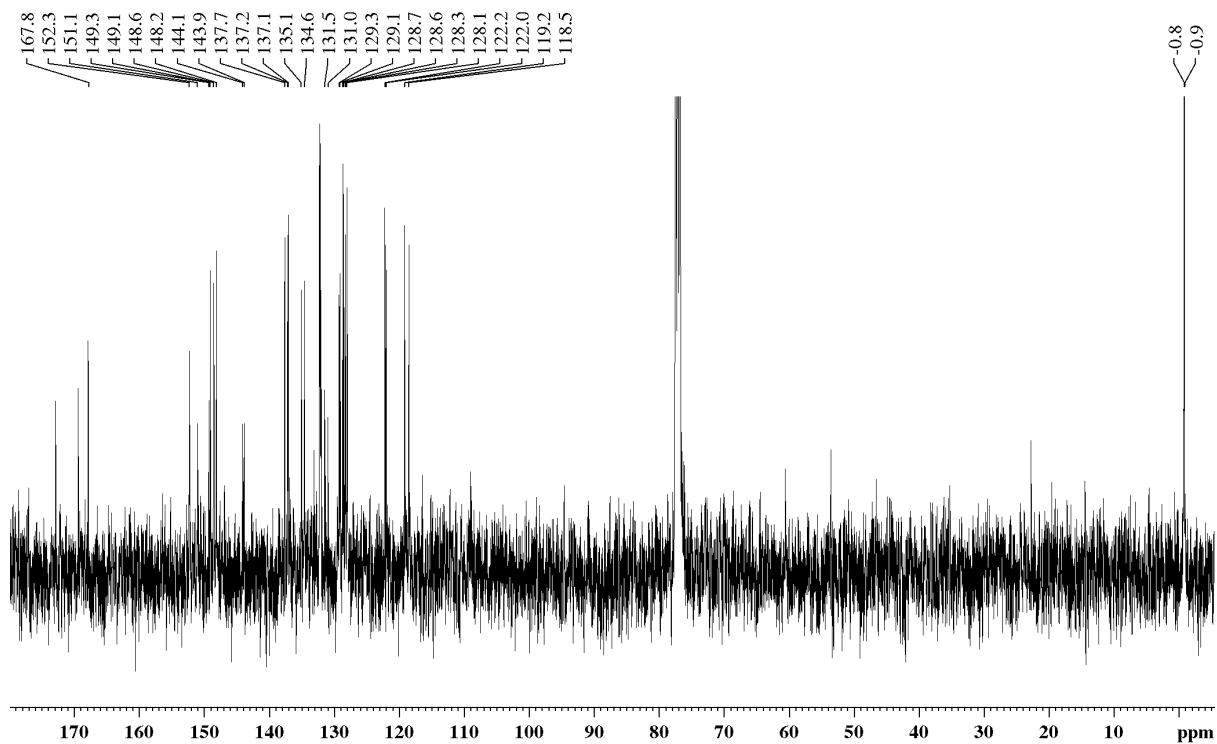

**Figure 14.** 101 MHz <sup>13</sup>C{<sup>1</sup>H} NMR Spectra of **C3** in CDCl<sub>3</sub>.

**<sup>13</sup>C Observe with <sup>1</sup>H decoupling - D1 = 2s  
Complex\_C4**

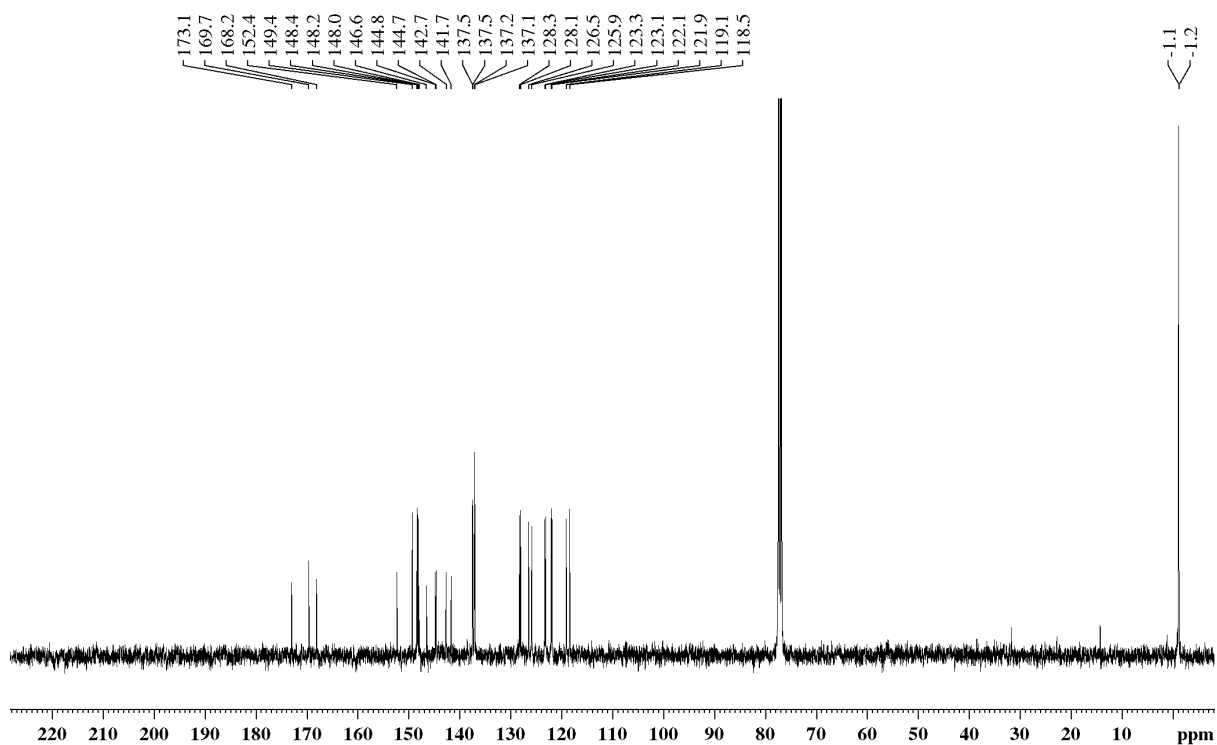

**Figure 15.** 101 MHz <sup>13</sup>C{<sup>1</sup>H} NMR Spectra of **Irpic** in CDCl<sub>3</sub>.



**<sup>13</sup>C Observe with <sup>1</sup>H decoupling - D1 = 2s  
Complex\_N4**

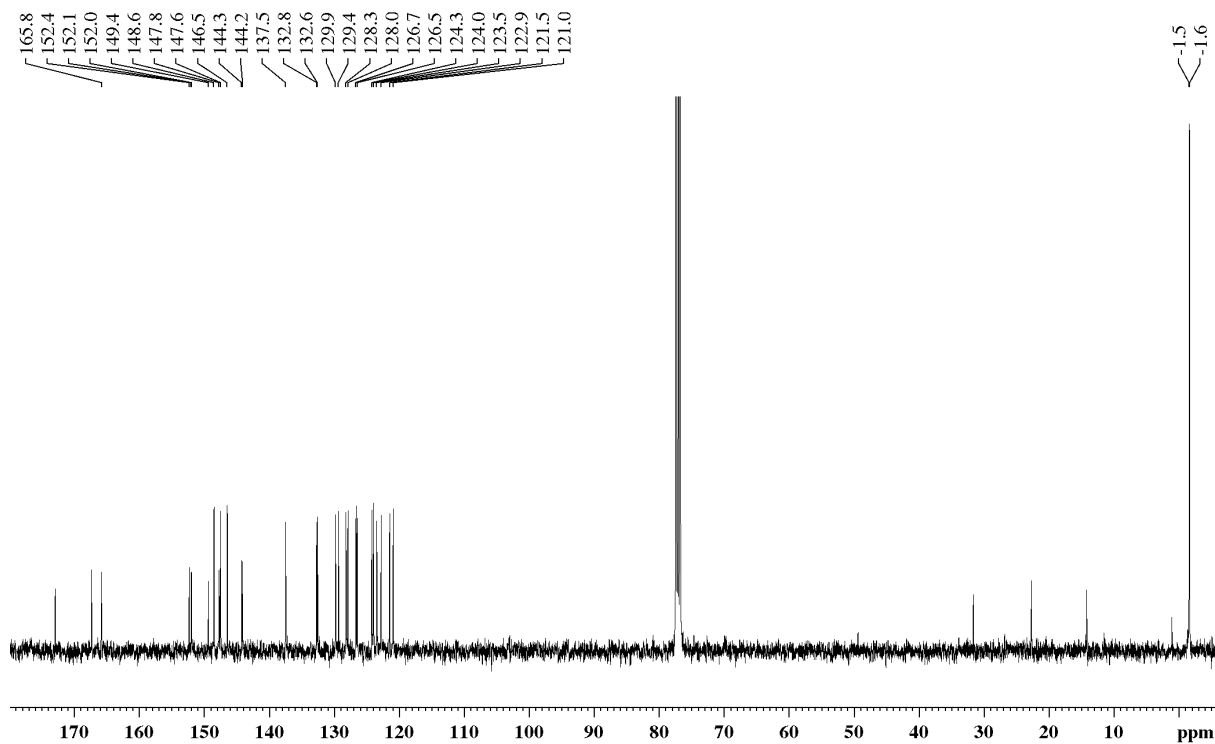

**Figure 16.** 101 MHz <sup>13</sup>C{<sup>1</sup>H} NMR Spectra of N4 in CDCl<sub>3</sub>.

**<sup>13</sup>C Observe with <sup>1</sup>H decoupling - D1 = 2s  
Complex\_N5**

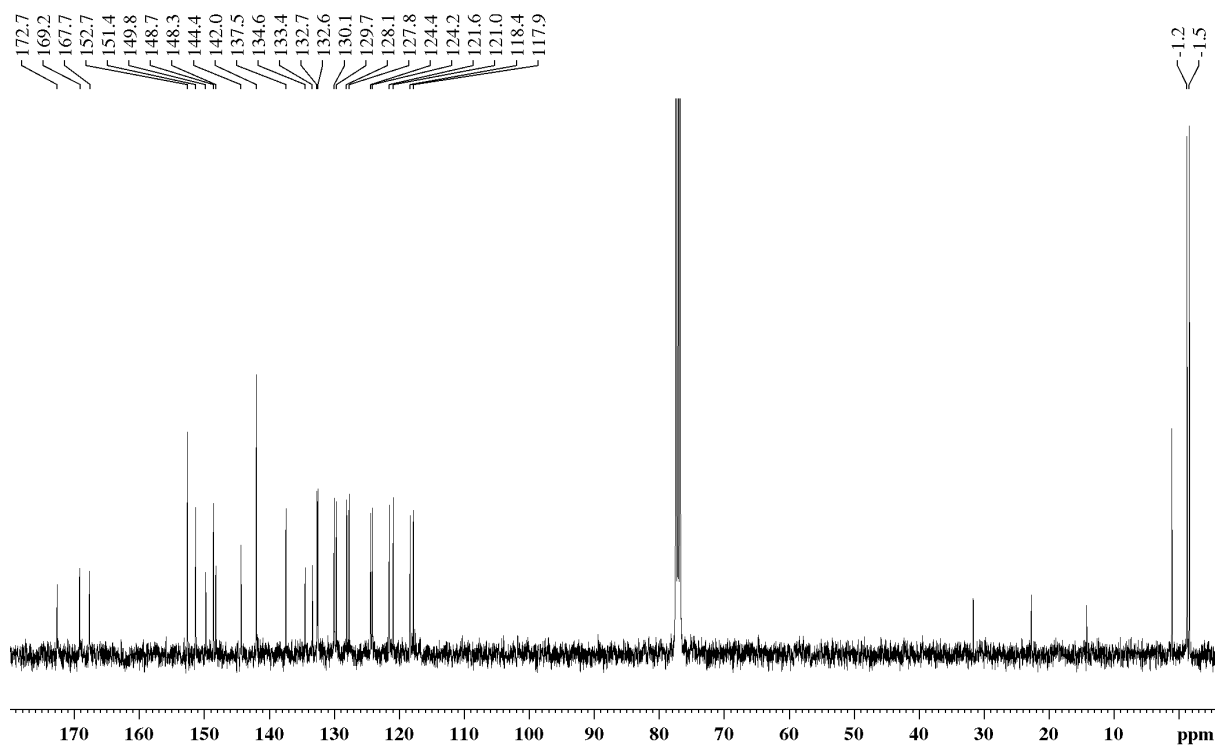

**Figure 17.** 101 MHz <sup>13</sup>C{<sup>1</sup>H} NMR Spectra of N5 in CDCl<sub>3</sub>.

**<sup>13</sup>C Observe with <sup>1</sup>H decoupling - D1 = 2s**  
**Complex\_C3N4**

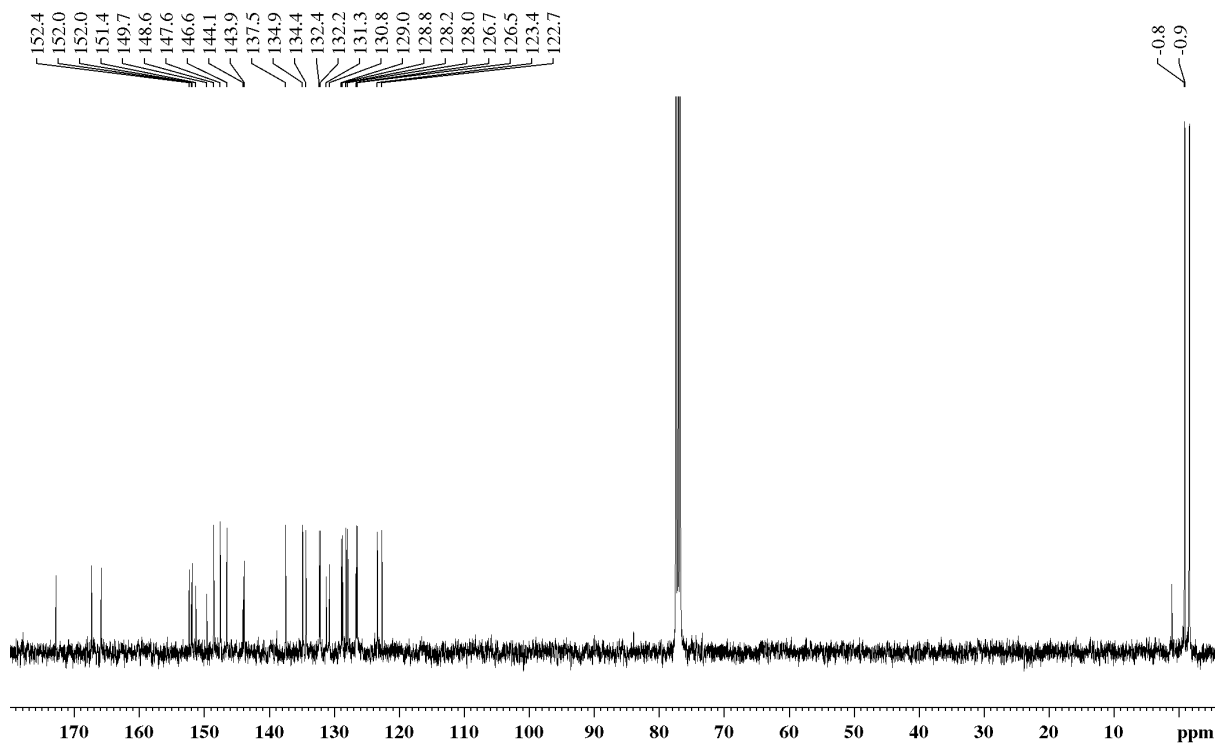

**Figure 18.** 101 MHz <sup>13</sup>C{<sup>1</sup>H} NMR Spectra of C3N4 in CDCl<sub>3</sub>.

**<sup>13</sup>C Observe with <sup>1</sup>H decoupling - D1 = 2s**  
**Complex\_C3N5**

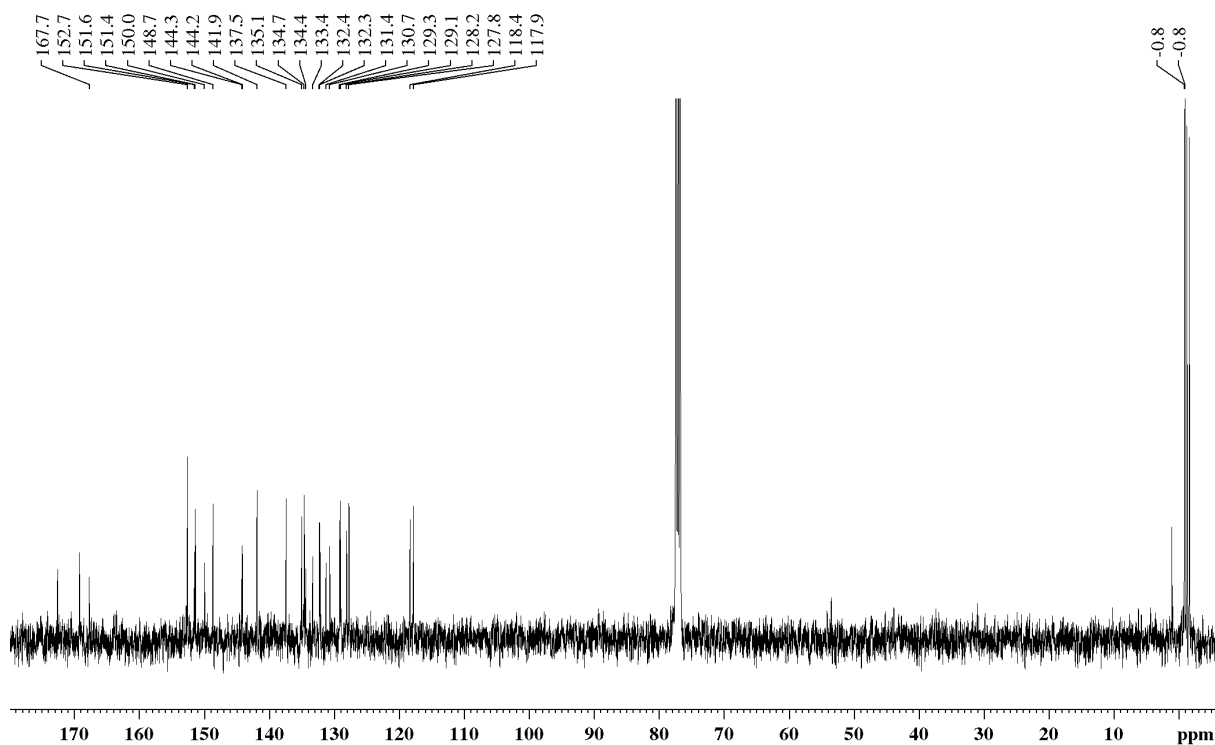

**Figure 19.** 101 MHz <sup>13</sup>C{<sup>1</sup>H} NMR Spectra of C3N5 in CDCl<sub>3</sub>.

**<sup>13</sup>C Observe with <sup>1</sup>H decoupling - D1 = 2s**  
**Complex\_C4N4**

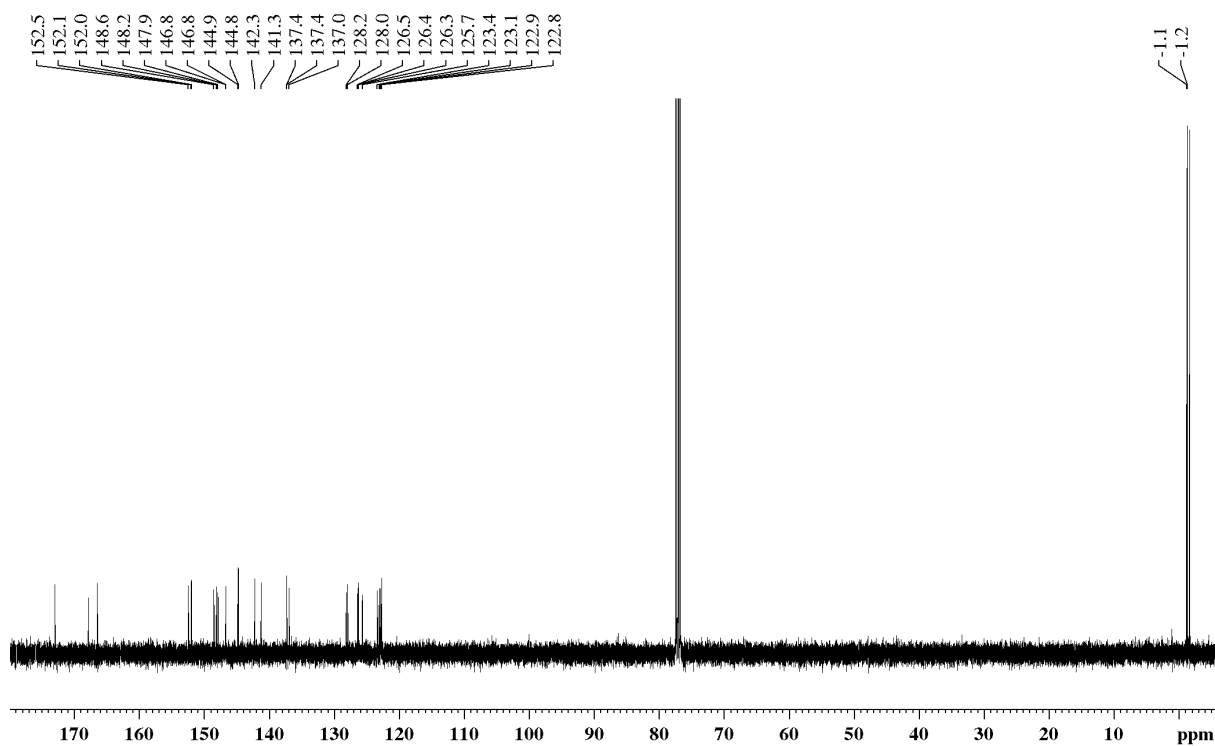

**Figure 20.** 101 MHz <sup>13</sup>C{<sup>1</sup>H} NMR Spectra of C4N4 in CDCl<sub>3</sub>.

**<sup>13</sup>C Observe with <sup>1</sup>H decoupling - D1 = 2s**  
**Complex\_C4N5**

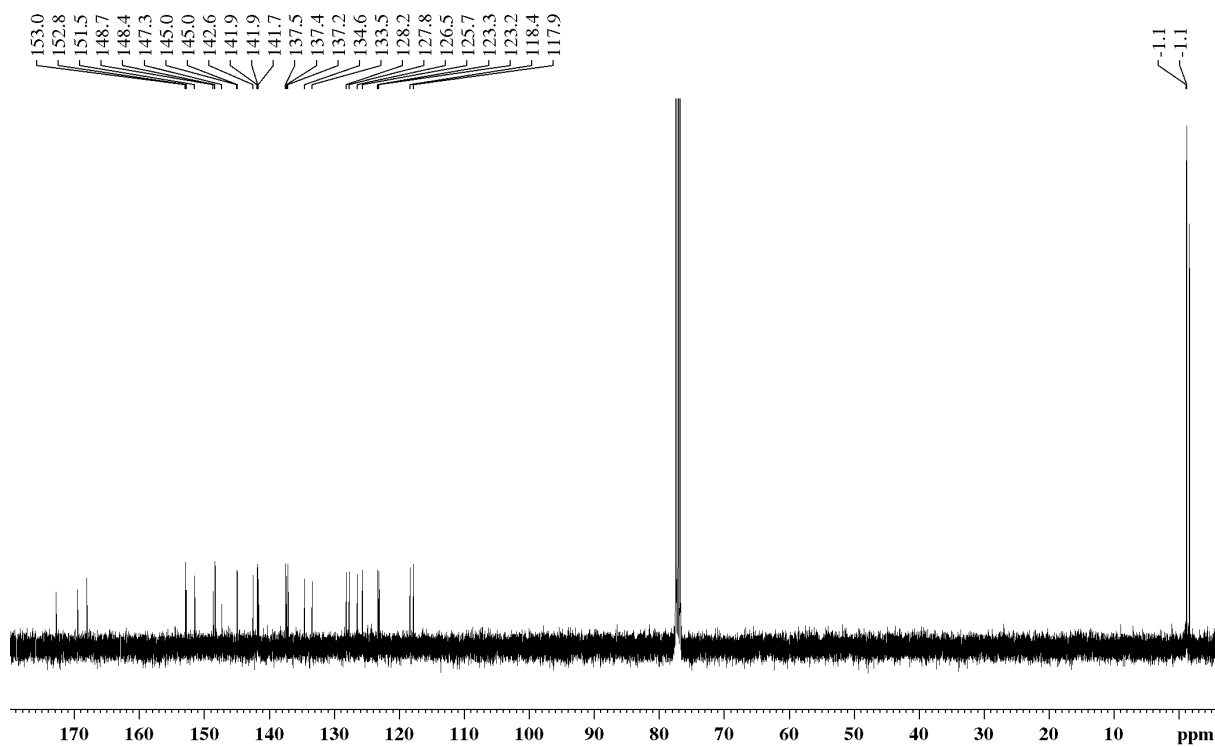

**Figure 21.** 101 MHz <sup>13</sup>C{<sup>1</sup>H} NMR Spectra of C4N5 in CDCl<sub>3</sub>.

**<sup>29</sup>Si Observe with <sup>1</sup>H Decoupling  
Complex\_C3**

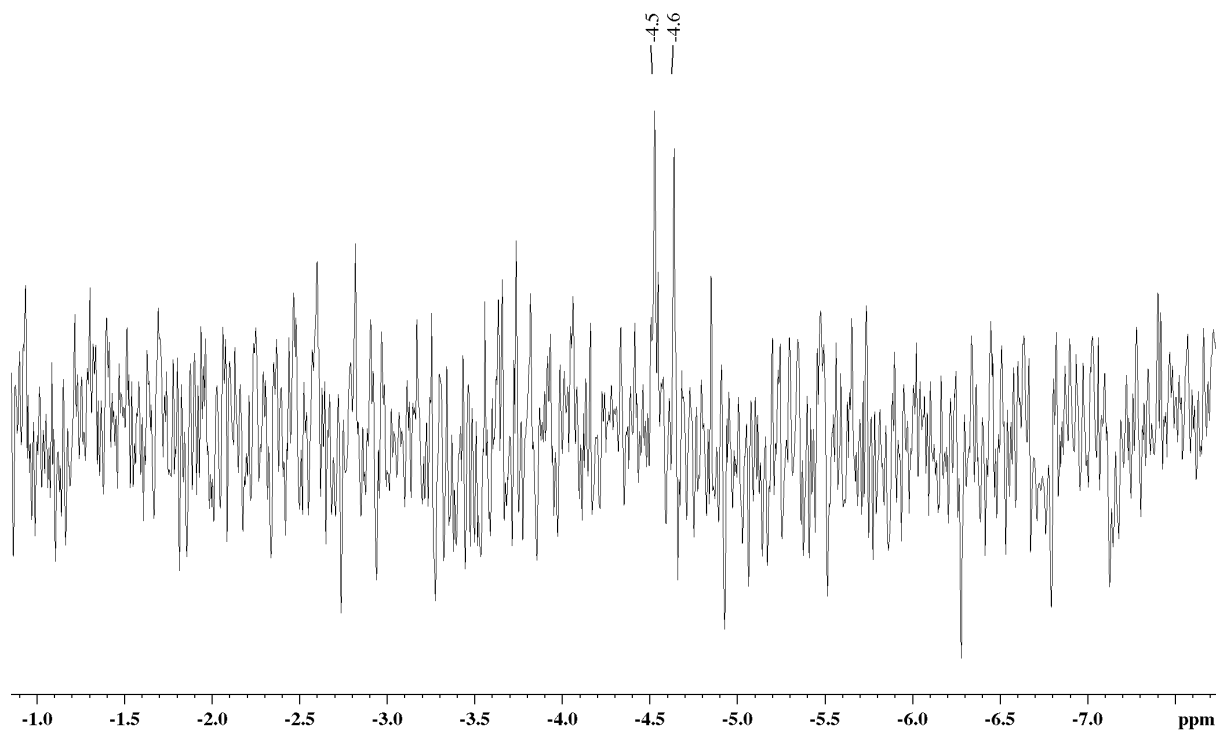

**Figure 22.** 79 MHz <sup>29</sup>Si{<sup>1</sup>H} NMR Spectra of C3 in CDCl<sub>3</sub>.

**<sup>29</sup>Si Observe with <sup>1</sup>H Decoupling  
Complex\_C4**

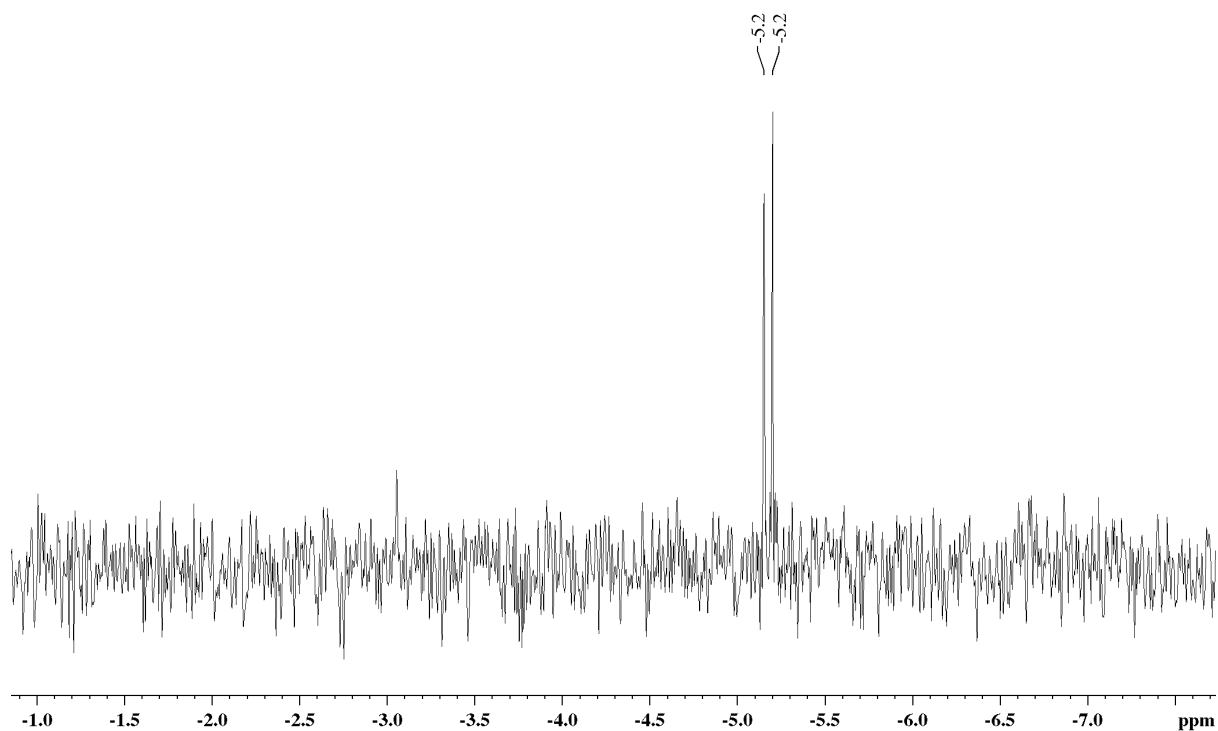

**Figure 23.** 79 MHz <sup>29</sup>Si{<sup>1</sup>H} NMR Spectra of C4 in CDCl<sub>3</sub>.

**<sup>29</sup>Si Observe with <sup>1</sup>H Decoupling  
Complex\_N4**

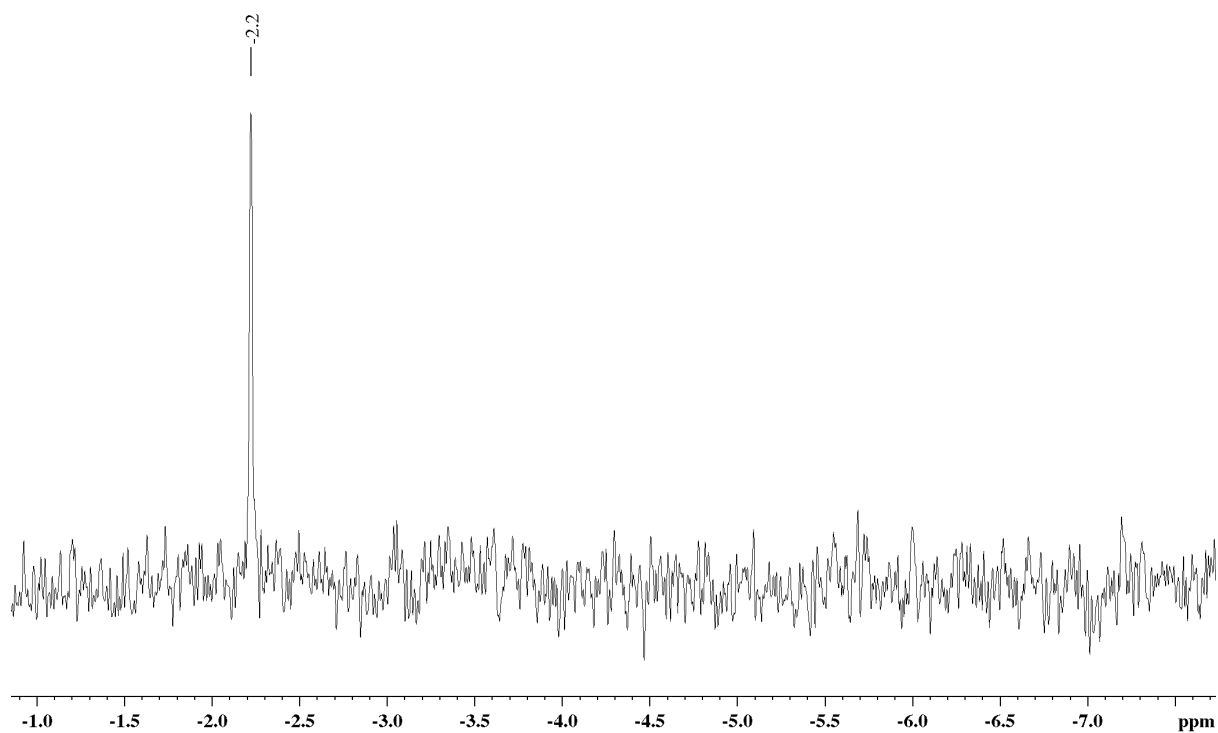

**Figure 24.** 79 MHz <sup>29</sup>Si{<sup>1</sup>H} NMR Spectra of N4 in CDCl<sub>3</sub>.

**<sup>29</sup>Si Observe with <sup>1</sup>H Decoupling  
Complex\_N5**

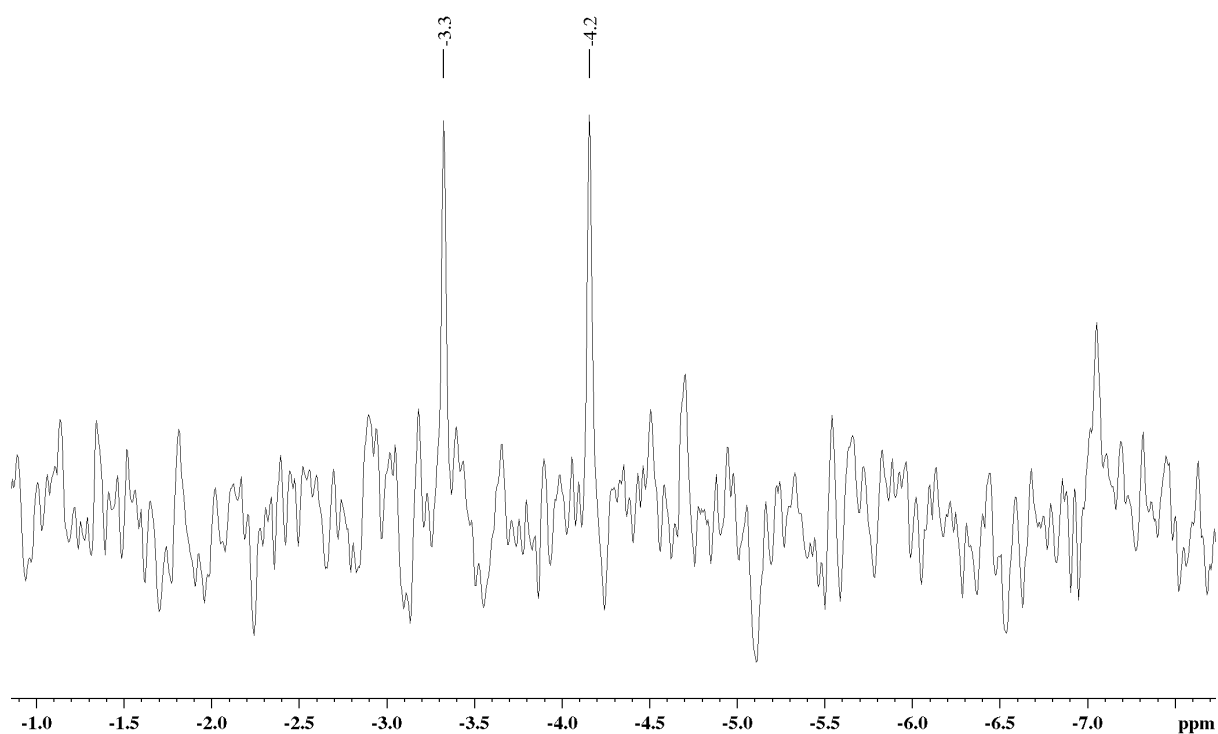

**Figure 25.** 79 MHz <sup>29</sup>Si{<sup>1</sup>H} NMR Spectra of N5 in CDCl<sub>3</sub>.

**<sup>29</sup>Si Observe with <sup>1</sup>H Decoupling  
Complex\_C3N4**

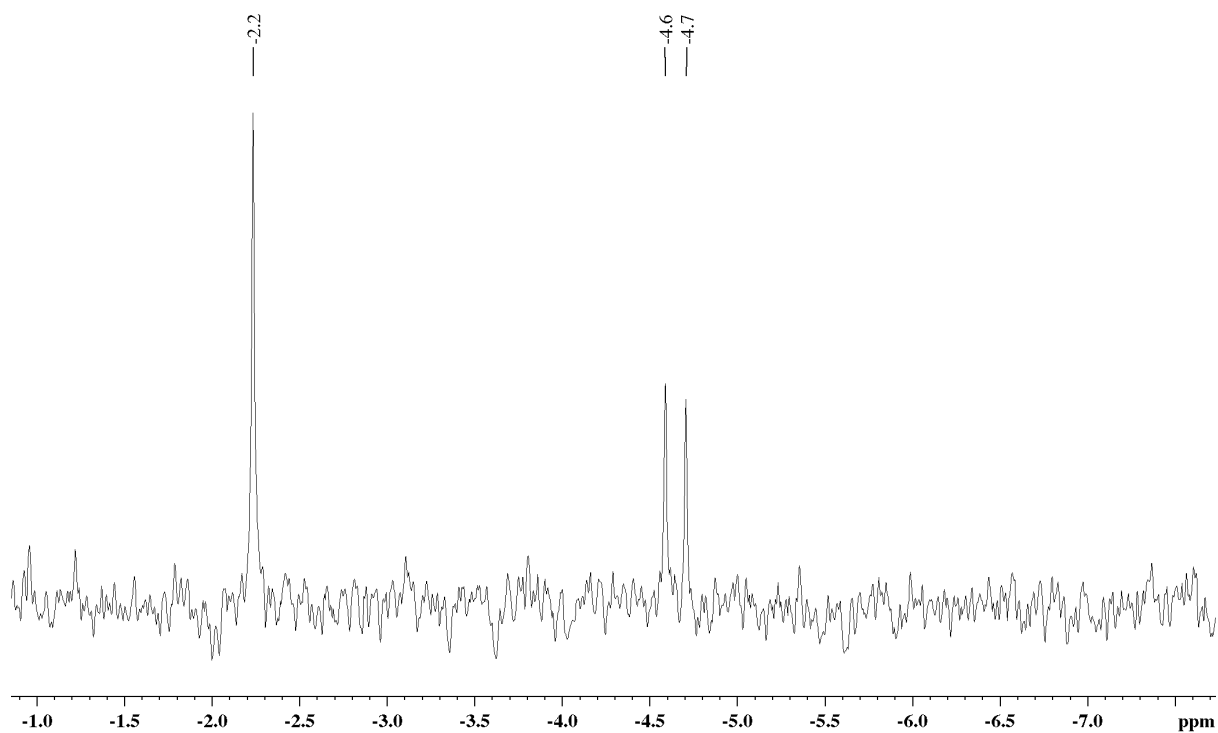

**Figure 26.** 79 MHz <sup>29</sup>Si{<sup>1</sup>H} NMR Spectra of C3N4 in CDCl<sub>3</sub>.

**<sup>29</sup>Si Observe with <sup>1</sup>H Decoupling  
Complex\_C3N5**

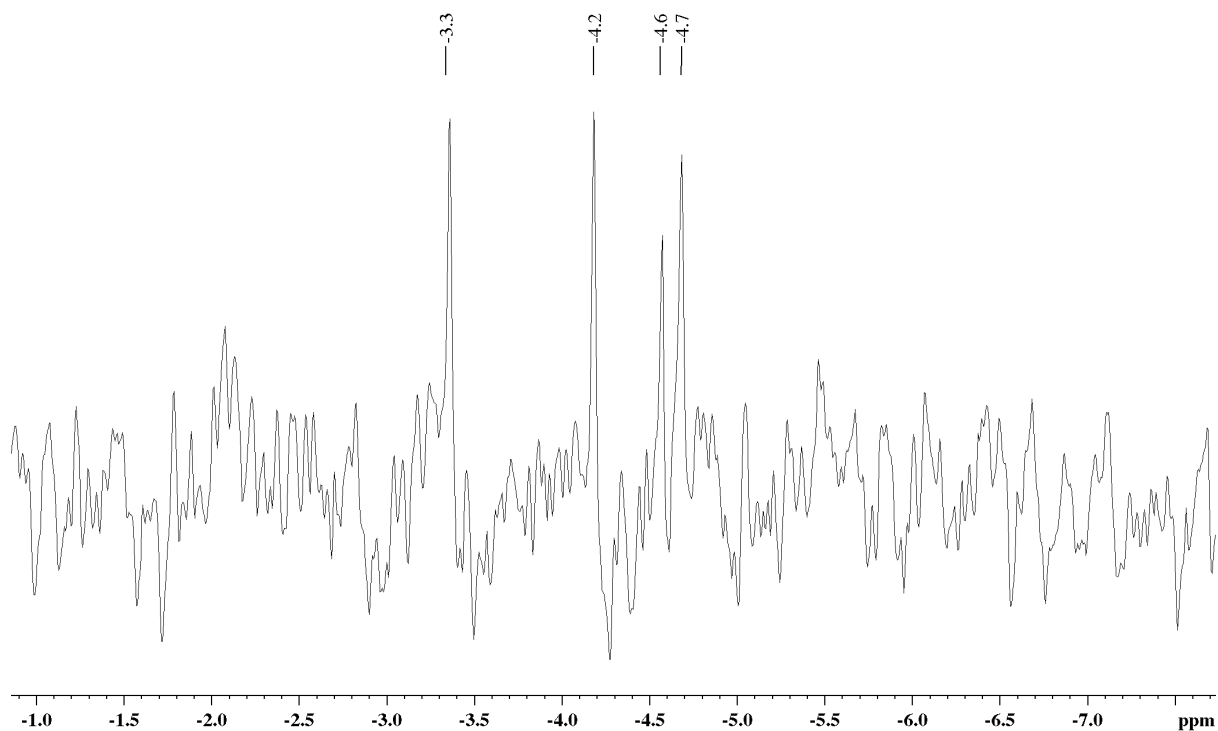

**Figure 27.** 79 MHz <sup>29</sup>Si{<sup>1</sup>H} NMR Spectra of C3N5 in CDCl<sub>3</sub>.

**<sup>29</sup>Si Observe with <sup>1</sup>H Decoupling  
Complex\_C4N4**

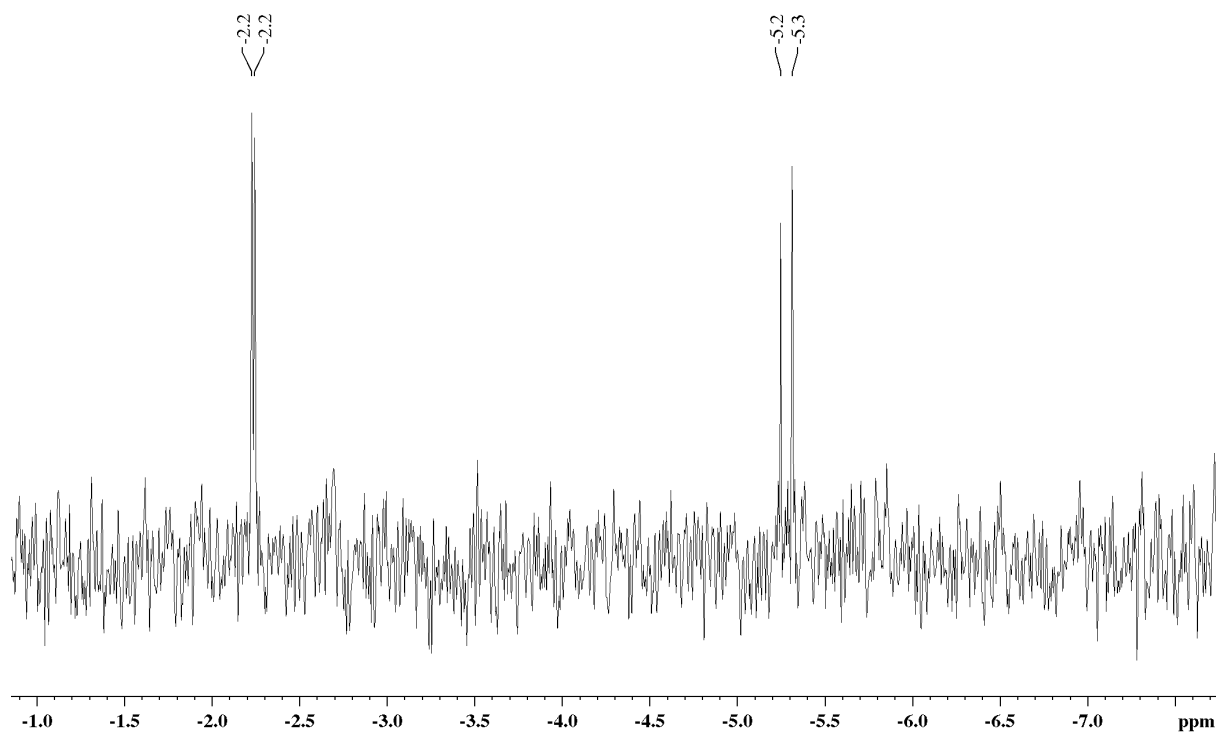

**Figure 28.** 79 MHz <sup>29</sup>Si{<sup>1</sup>H} NMR Spectra of C4N4 in CDCl<sub>3</sub>.

**<sup>29</sup>Si Observe with <sup>1</sup>H Decoupling  
Complex\_C4N5**

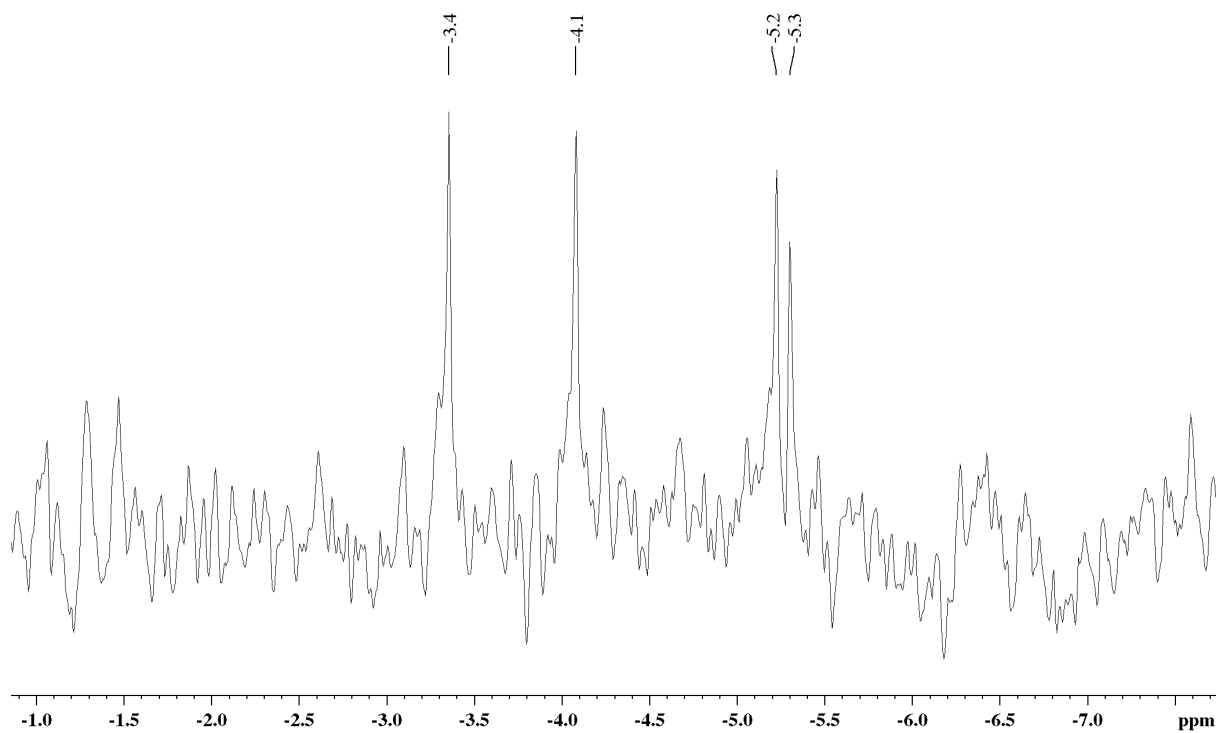

**Figure 29.** 79 MHz <sup>29</sup>Si{<sup>1</sup>H} NMR Spectra of C4N5 in CDCl<sub>3</sub>.

## HPLC Traces

### <Sample Information>

Sample Name : IrPic\_55  
Sample ID : IrPic\_55  
Method Filename : 55% Acetonitrile 45 Water 20 mins.lcm  
Batch Filename :  
Vial # : 2-10  
Injection Volume : 1 uL  
Date Acquired : 04/11/2022 16:11:20  
Date Processed : 04/11/2022 16:21:35  
Sample Type : Unknown  
Acquired by : System Administrator  
Processed by : System Administrator

### <Chromatogram>

mV

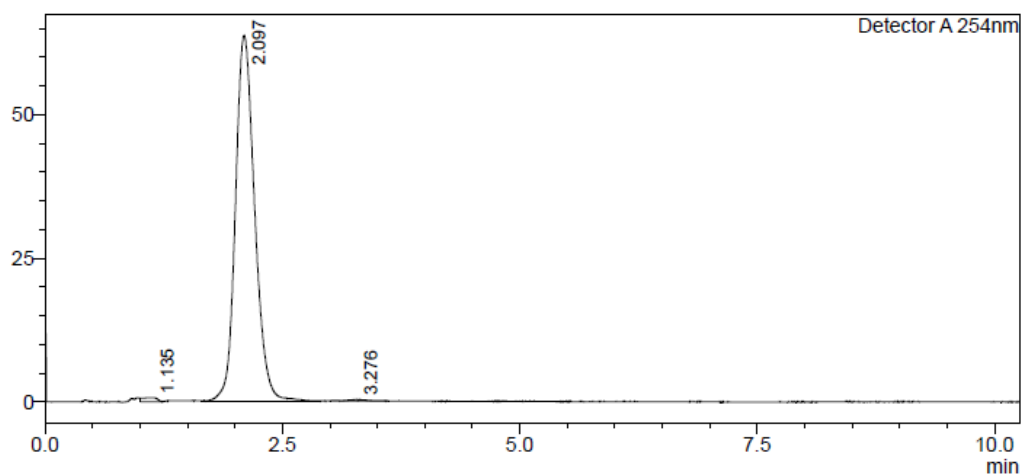

### <Peak Table>

Detector A 254nm

| Peak# | Ret. Time | Area   | Height | Area%   | Area/Height | Width at 5% Height |
|-------|-----------|--------|--------|---------|-------------|--------------------|
| 1     | 1.135     | 7373   | 682    | 0.815   | 10.813      | --                 |
| 2     | 2.097     | 894148 | 63593  | 98.819  | 14.060      | 0.478              |
| 3     | 3.276     | 3309   | 197    | 0.366   | 16.813      | 0.503              |
| Total |           | 904831 | 64472  | 100.000 |             |                    |

Figure 30. HPLC trace of IrPic.



### <Sample Information>

Sample Name : C3  
Sample ID : C3  
Method Filename : 75% Acetonitrile 25 Water 20 mins.lcm  
Batch Filename : Green\_emitters\_MeCN765.lcb  
Vial # : 2-11  
Injection Volume : 1 uL  
Date Acquired : 04/11/2022 11:25:29  
Date Processed : 04/11/2022 11:45:31  
Sample Type : Unknown  
Acquired by : System Administrator  
Processed by : System Administrator

### <Chromatogram>

mV

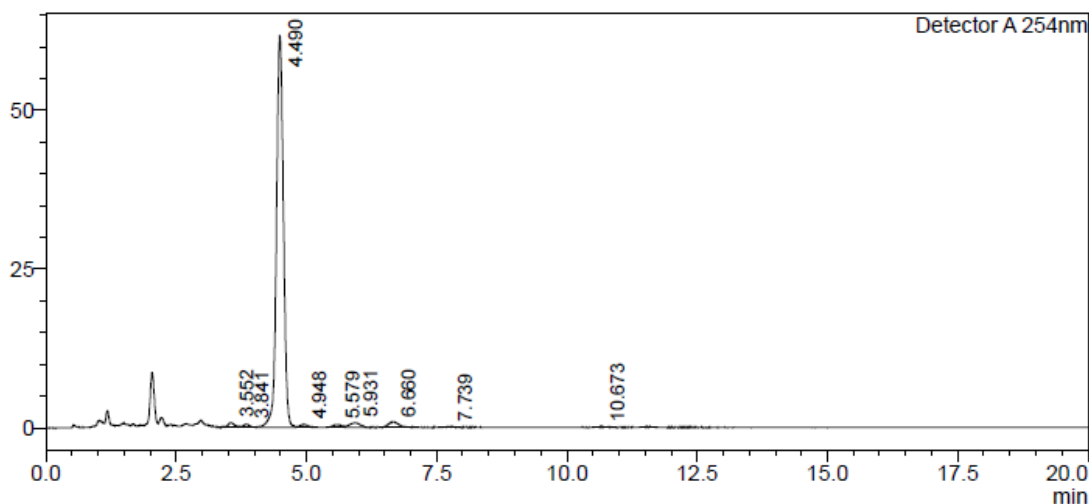

### <Peak Table>

Detector A 254nm

| Peak# | Ret. Time | Area   | Height | Area%   | Area/Height | Width at 5% Height |
|-------|-----------|--------|--------|---------|-------------|--------------------|
| 1     | 3.552     | 7297   | 773    | 1.178   | 9.444       | --                 |
| 2     | 3.841     | 4177   | 502    | 0.674   | 8.322       | --                 |
| 3     | 4.490     | 573676 | 61616  | 92.632  | 9.311       | 0.313              |
| 4     | 4.948     | 4512   | 454    | 0.729   | 9.944       | --                 |
| 5     | 5.579     | 4806   | 433    | 0.776   | 11.101      | --                 |
| 6     | 5.931     | 10236  | 735    | 1.653   | 13.926      | --                 |
| 7     | 6.660     | 12122  | 845    | 1.957   | 14.337      | 0.541              |
| 8     | 7.739     | 1287   | 100    | 0.208   | 12.900      | 0.351              |
| 9     | 10.673    | 1197   | 81     | 0.193   | 14.738      | 0.386              |
| Total |           | 619309 | 65539  | 100.000 |             |                    |

Figure 31. HPLC trace of C3.

**<Sample Information>**

Sample Name : C4  
Sample ID : C4  
Method Filename : 75% Acetonitrile 25 Water 20 mins.lcm  
Batch Filename : Green\_emitters\_MeCN765.lcb  
Vial # : 2-12  
Injection Volume : 1 uL  
Date Acquired : 04/11/2022 11:56:16  
Date Processed : 04/11/2022 12:16:19  
Sample Type : Unknown  
Acquired by : System Administrator  
Processed by : System Administrator

**<Chromatogram>**

mV

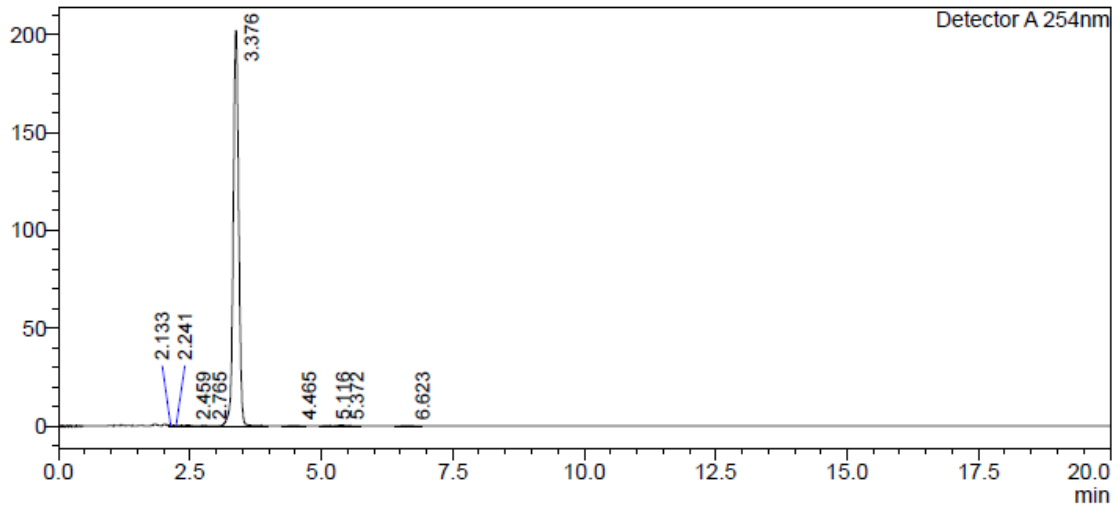

**<Peak Table>**

Detector A 254nm

| Peak# | Ret. Time | Area    | Height | Area%   | Area/Height | Width at 5% Height |
|-------|-----------|---------|--------|---------|-------------|--------------------|
| 1     | 2.133     | 1617    | 333    | 0.109   | 4.855       | --                 |
| 2     | 2.241     | 2456    | 366    | 0.165   | 6.718       | --                 |
| 3     | 2.459     | 3865    | 530    | 0.260   | 7.297       | --                 |
| 4     | 2.765     | 1729    | 185    | 0.116   | 9.361       | --                 |
| 5     | 3.376     | 1464873 | 201533 | 98.444  | 7.269       | 0.243              |
| 6     | 4.465     | 2562    | 214    | 0.172   | 11.975      | 0.347              |
| 7     | 5.116     | 1196    | 123    | 0.080   | 9.707       | --                 |
| 8     | 5.372     | 5732    | 486    | 0.385   | 11.799      | --                 |
| 9     | 6.623     | 3993    | 320    | 0.268   | 12.462      | 0.366              |
| Total |           | 1488023 | 204089 | 100.000 |             |                    |

**Figure 32.** HPLC trace of C4.

**<Sample Information>**

Sample Name : N4  
Sample ID : N4  
Method Filename : 75% Acetonitrile 25 Water 20 mins.lcm  
Batch Filename : Green\_emitters\_MeCN765.lcb  
Vial # : 2-13  
Injection Volume : 1 uL  
Date Acquired : 04/11/2022 12:27:05  
Date Processed : 04/11/2022 12:47:07  
Sample Type : Unknown  
Acquired by : System Administrator  
Processed by : System Administrator

**<Chromatogram>**

mV

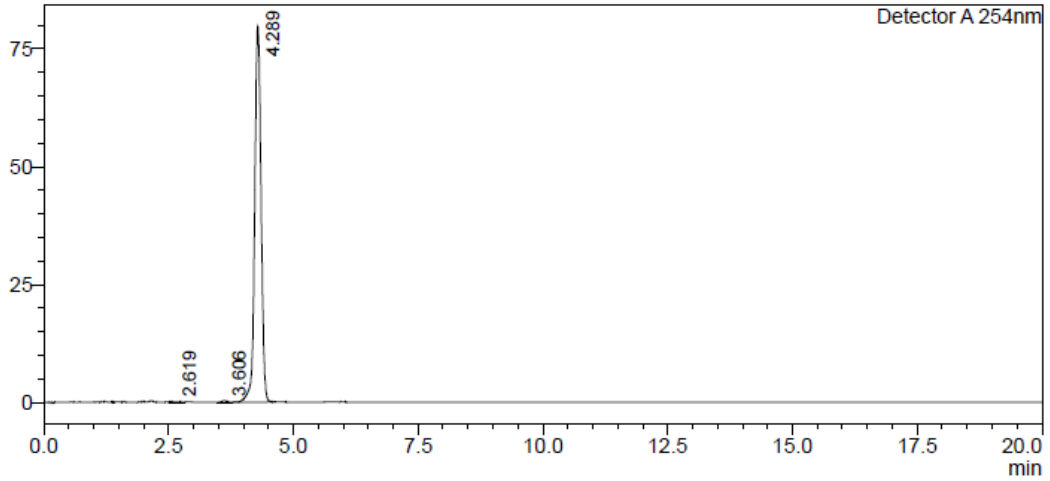

**<Peak Table>**

Detector A 254nm

| Peak# | Ret. Time | Area   | Height | Area%   | Area/Height | Width at 5% Height |
|-------|-----------|--------|--------|---------|-------------|--------------------|
| 1     | 2.619     | 1021   | 134    | 0.143   | 7.609       | -                  |
| 2     | 3.606     | 1980   | 281    | 0.277   | 7.055       | 0.205              |
| 3     | 4.289     | 711000 | 79662  | 99.580  | 8.925       | 0.299              |
| Total |           | 714001 | 80076  | 100.000 |             |                    |

**Figure 33.** HPLC trace of N4.

### <Sample Information>

Sample Name : N5  
Sample ID : N5  
Method Filename : 75% Acetonitrile 25 Water 20 mins.lcm  
Batch Filename : Green\_emitters\_MeCN765.lcb  
Vial # : 2-14  
Injection Volume : 1 uL  
Date Acquired : 04/11/2022 12:57:53  
Date Processed : 04/11/2022 13:17:55  
Sample Type : Unknown  
Acquired by : System Administrator  
Processed by : System Administrator

### <Chromatogram>

mV

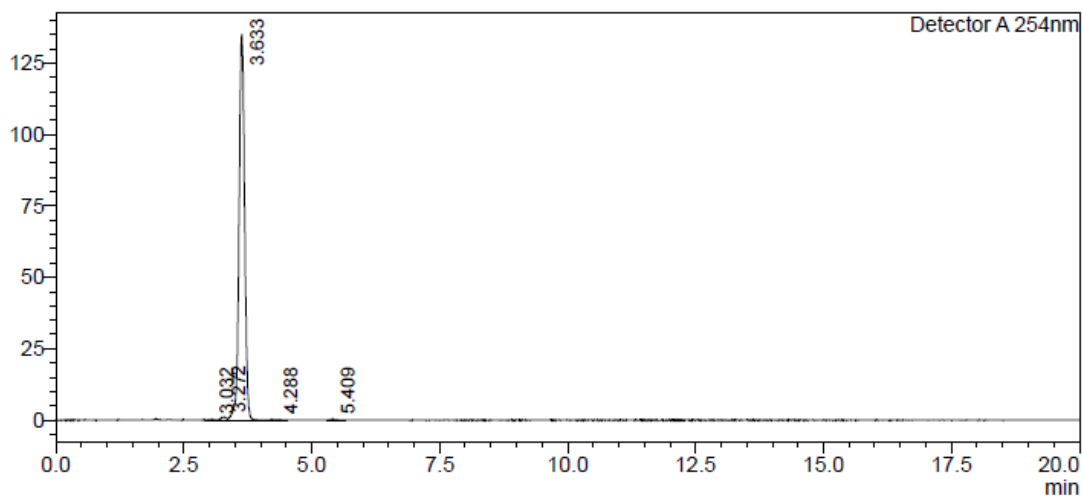

### <Peak Table>

Detector A 254nm

| Peak# | Ret. Time | Area    | Height | Area%   | Area/Height | Width at 5% Height |
|-------|-----------|---------|--------|---------|-------------|--------------------|
| 1     | 3.032     | 1289    | 183    | 0.124   | 7.041       | --                 |
| 2     | 3.272     | 7396    | 1054   | 0.713   | 7.019       | --                 |
| 3     | 3.633     | 1025515 | 134376 | 98.816  | 7.632       | 0.257              |
| 4     | 4.288     | 1691    | 109    | 0.163   | 15.488      | --                 |
| 5     | 5.409     | 1911    | 186    | 0.184   | 10.250      | --                 |
| Total |           | 1037802 | 135909 | 100.000 |             |                    |

Figure 34. HPLC Trace of N5.

<Sample Information>

Sample Name : C3N4\_90  
Sample ID : C3N4\_90  
Method Filename : 90% Acetonitrile 10 Water 20 mins.lcm  
Batch Filename : Green\_emitters\_MeCN765.lcb  
Vial # : 2-15  
Injection Volume : 10 uL  
Date Acquired : 04/11/2022 16:42:09  
Date Processed : 04/11/2022 17:02:12  
Sample Type : Unknown  
Acquired by : System Administrator  
Processed by : System Administrator

<Chromatogram>

mV

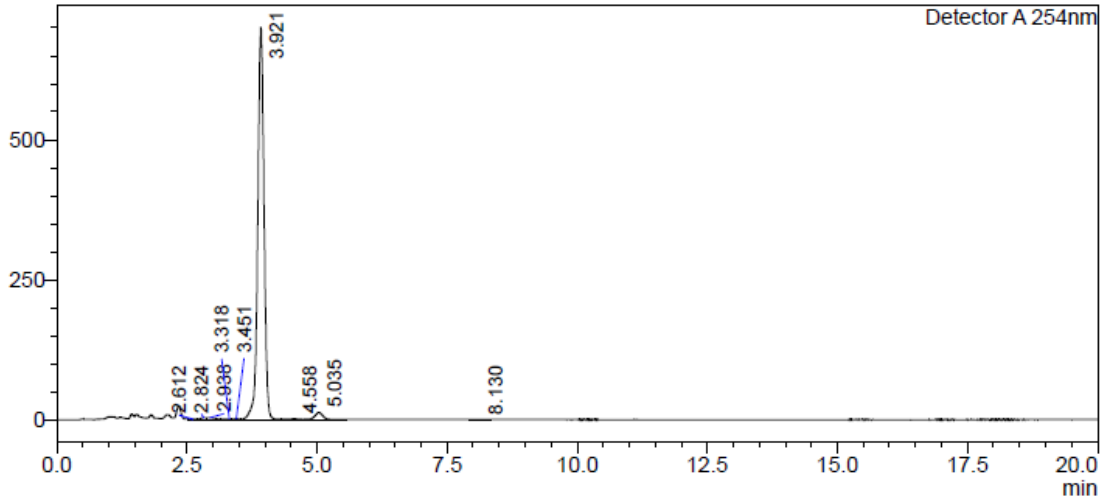

<Peak Table>

Detector A 254nm

| Peak# | Ret. Time | Area    | Height | Area%   | Area/Height | Width at 5% Height |
|-------|-----------|---------|--------|---------|-------------|--------------------|
| 1     | 2.612     | 7526    | 991    | 0.123   | 7.594       | --                 |
| 2     | 2.824     | 22184   | 2943   | 0.363   | 7.537       | --                 |
| 3     | 2.938     | 36639   | 3402   | 0.600   | 10.771      | --                 |
| 4     | 3.318     | 10296   | 971    | 0.168   | 10.607      | --                 |
| 5     | 3.451     | 13022   | 1598   | 0.213   | 8.151       | --                 |
| 6     | 3.921     | 5864119 | 699749 | 95.956  | 8.380       | 0.290              |
| 7     | 4.558     | 21724   | 1626   | 0.355   | 13.363      | --                 |
| 8     | 5.035     | 134073  | 12470  | 2.194   | 10.752      | 0.394              |
| 9     | 8.130     | 1705    | 145    | 0.028   | 11.754      | 0.330              |
| Total |           | 6111289 | 723894 | 100.000 |             |                    |

Figure 35. HPLC Trace of C3N4.

**<Sample Information>**

Sample Name : C3N5\_90  
Sample ID : C3N5\_90  
Method Filename : 90% Acetonitrile 10 Water 20 mins.lcm  
Batch Filename : Green\_emitters\_MeCN765.lcb  
Vial # : 2-16  
Injection Volume : 10 uL  
Date Acquired : 04/11/2022 17:13:00  
Date Processed : 04/11/2022 17:33:01  
Sample Type : Unknown  
Acquired by : System Administrator  
Processed by : System Administrator

**<Chromatogram>**

mV

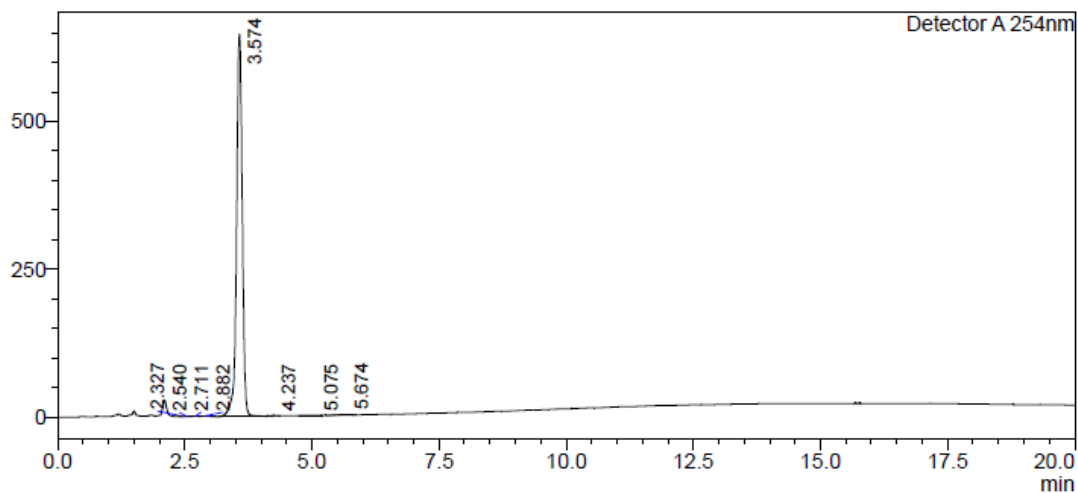

**<Peak Table>**

Detector A 254nm

| Peak# | Ret. Time | Area    | Height | Area%   | Area/Height | Width at 5% Height |
|-------|-----------|---------|--------|---------|-------------|--------------------|
| 1     | 2.327     | 18190   | 2505   | 0.358   | 7.263       | --                 |
| 2     | 2.540     | 2466    | 350    | 0.049   | 7.052       | --                 |
| 3     | 2.711     | 4144    | 535    | 0.082   | 7.745       | --                 |
| 4     | 2.882     | 5749    | 610    | 0.113   | 9.427       | --                 |
| 5     | 3.574     | 5034789 | 644443 | 99.081  | 7.813       | 0.277              |
| 6     | 4.237     | 3307    | 440    | 0.065   | 7.521       | 0.227              |
| 7     | 5.075     | 1271    | 101    | 0.025   | 12.642      | 0.334              |
| 8     | 5.674     | 11586   | 678    | 0.228   | 17.098      | 0.500              |
| Total |           | 5081502 | 649660 | 100.000 |             |                    |

**Figure 36.** HPLC Trace of C3N5.

**<Sample Information>**

Sample Name : C4N4\_90  
Sample ID : C4N4\_90  
Method Filename : 90% Acetonitrile 10 Water 20 mins.lcm  
Batch Filename : Green\_emitters\_MeCN765.lcb  
Vial # : 2-17  
Injection Volume : 10 uL  
Date Acquired : 04/11/2022 17:43:48  
Date Processed : 04/11/2022 18:03:50  
Sample Type : Unknown  
Acquired by : System Administrator  
Processed by : System Administrator

**<Chromatogram>**

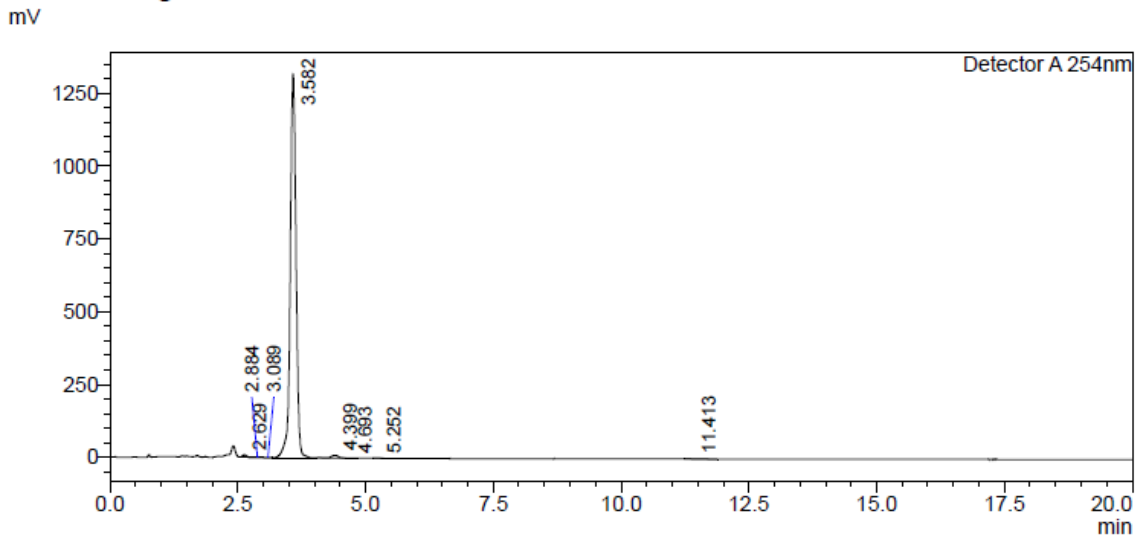

**<Peak Table>**

| Detector A 254nm |           |          |         |         |             |                    |
|------------------|-----------|----------|---------|---------|-------------|--------------------|
| Peak#            | Ret. Time | Area     | Height  | Area%   | Area/Height | Width at 5% Height |
| 1                | 2.629     | 57089    | 9398    | 0.542   | 6.075       | --                 |
| 2                | 2.884     | 3426     | 671     | 0.033   | 5.110       | 0.155              |
| 3                | 3.089     | 3960     | 638     | 0.038   | 6.205       | --                 |
| 4                | 3.582     | 10378155 | 1313188 | 98.520  | 7.903       | 0.278              |
| 5                | 4.399     | 84762    | 9366    | 0.805   | 9.050       | 0.311              |
| 6                | 4.693     | 2078     | 293     | 0.020   | 7.093       | 0.188              |
| 7                | 5.252     | 2041     | 218     | 0.019   | 9.357       | 0.264              |
| 8                | 11.413    | 2536     | 128     | 0.024   | 19.745      | 0.487              |
| Total            |           | 10534048 | 1333900 | 100.000 |             |                    |

**Figure 37.** HPLC Trace of C4N4.

### <Sample Information>

Sample Name : C4N5\_90  
Sample ID : C4N5\_90  
Method Filename : 90% Acetonitrile 10 Water 20 mins.lcm  
Batch Filename : Green\_emitters\_MeCN765.lcb  
Vial # : 2-18  
Injection Volume : 10 uL  
Date Acquired : 04/11/2022 18:14:38  
Date Processed : 04/11/2022 18:34:40  
Sample Type : Unknown  
Acquired by : System Administrator  
Processed by : System Administrator

### <Chromatogram>

mV

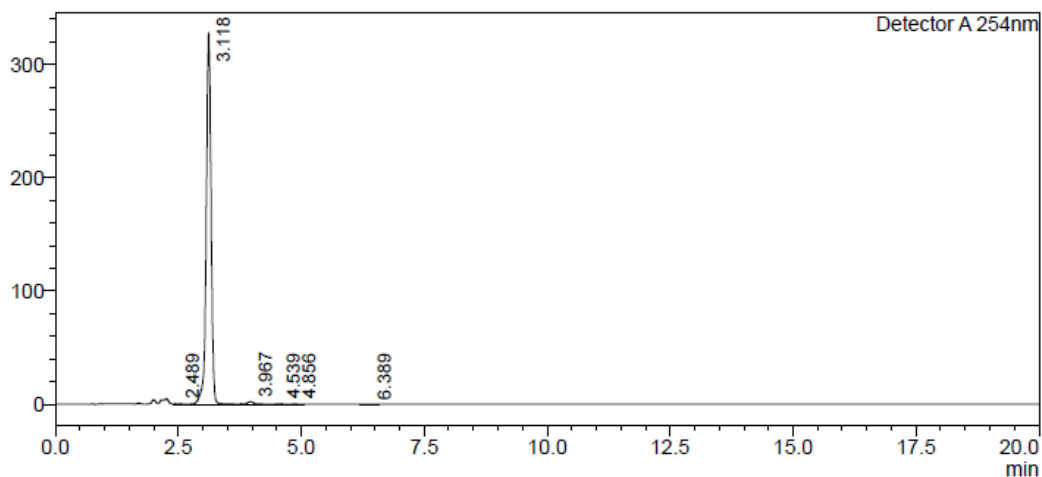

### <Peak Table>

Detector A 254nm

| Peak# | Ret. Time | Area    | Height | Area%   | Area/Height | Width at 5% Height |
|-------|-----------|---------|--------|---------|-------------|--------------------|
| 1     | 2.489     | 3850    | 426    | 0.168   | 9.030       | -                  |
| 2     | 3.118     | 2268528 | 325893 | 98.812  | 6.961       | 0.246              |
| 3     | 3.967     | 18782   | 2148   | 0.818   | 8.744       | 0.377              |
| 4     | 4.539     | 1914    | 214    | 0.083   | 8.957       | 0.275              |
| 5     | 4.856     | 1450    | 166    | 0.063   | 8.753       | 0.249              |
| 6     | 6.389     | 1286    | 116    | 0.056   | 11.092      | 0.301              |
| Total |           | 2295809 | 328962 | 100.000 |             |                    |

Figure 38. HPLC Trace of C4N5.



# HRMS

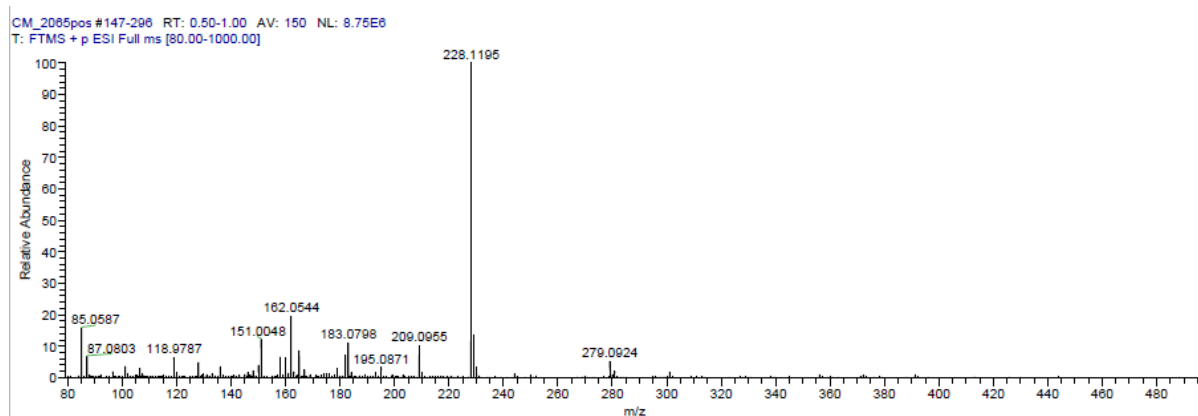

Figure 39. HR-MS of C3Sippy ligand.

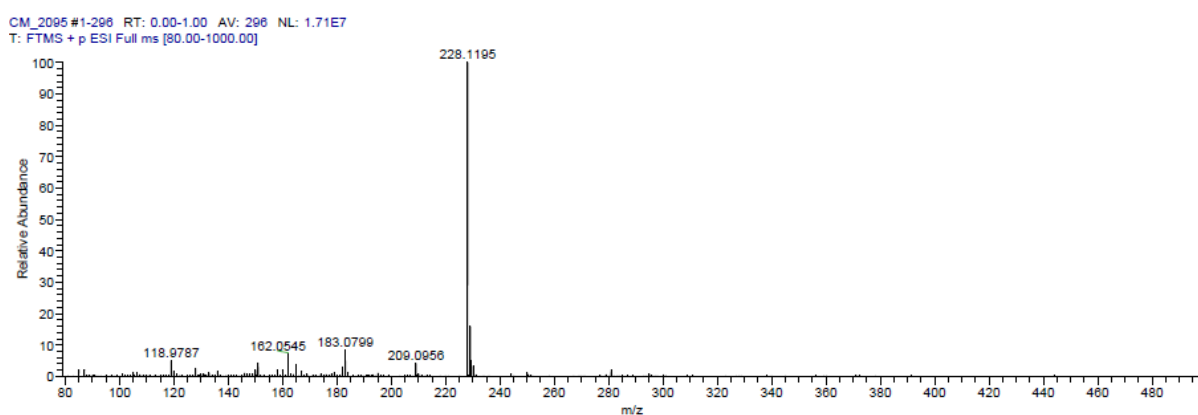

Figure 40. HR-MS of C4Sippy ligand.

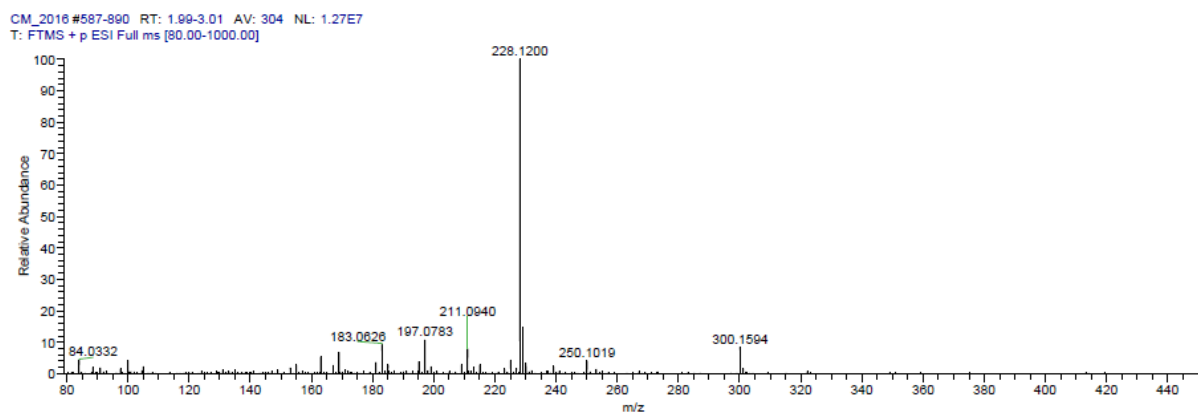

Figure 41. HR-MS of N4Sippy ligand.

CM\_1957 #1-235 RT: 0.00-0.80 AV: 235 NL: 1.29E8  
T: FTMS + p ESI Full ms [80.00-1000.00]

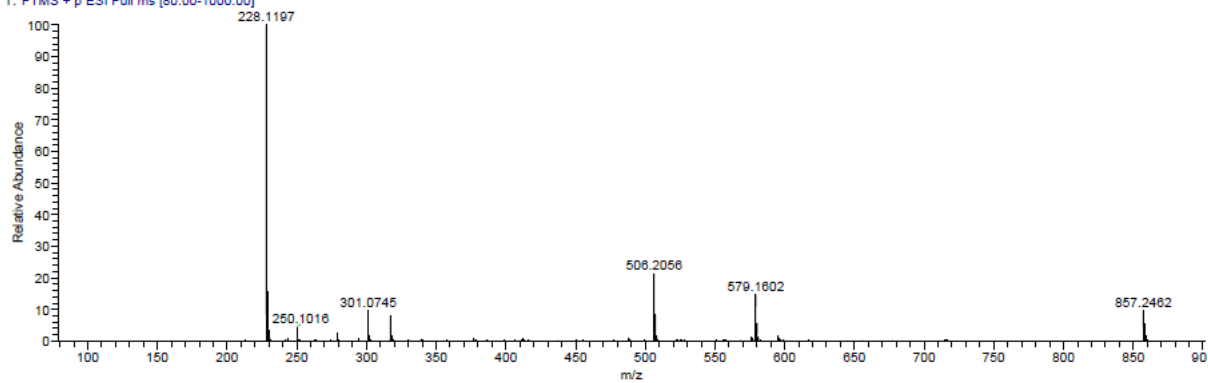

Figure 42. HR-MS of N5Sippy ligand.

CM\_2107 #1-296 RT: 0.00-1.00 AV: 296 NL: 1.11E7  
T: FTMS + p ESI Full ms [80.00-1000.00]

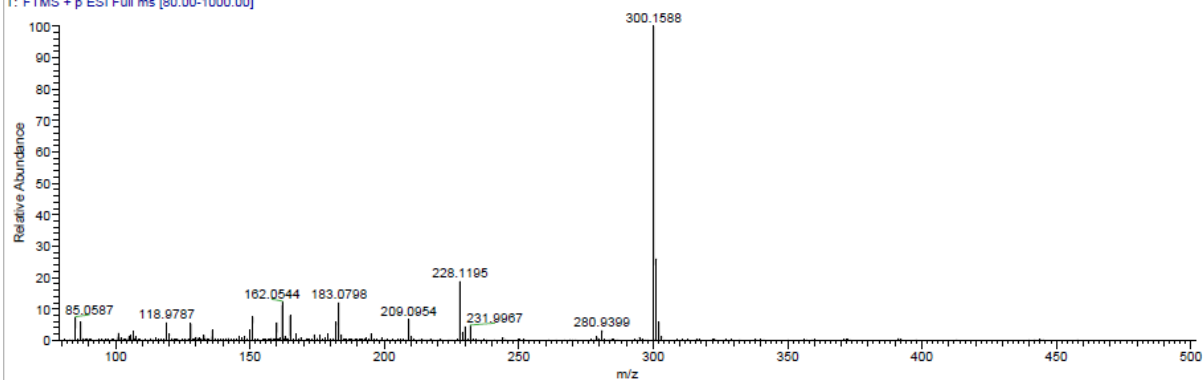

Figure 43. HR-MS of C3N4Sippy ligand.

CM\_1988 #236-443 RT: 0.80-1.50 AV: 208 NL: 1.81E7  
T: FTMS + p ESI Full ms [80.00-1000.00]

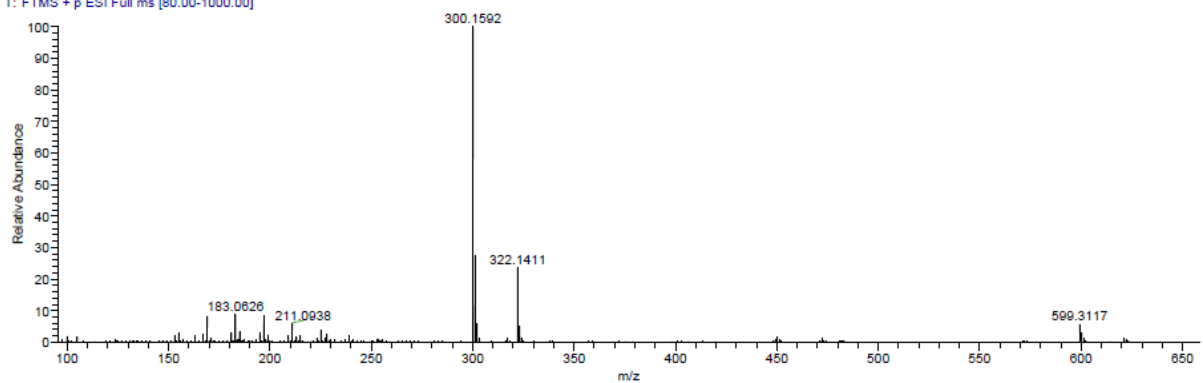

Figure 44. HR-MS of C3N5Sippy ligand.

CM\_2108 #1-296 RT: 0.00-1.00 AV: 296 NL: 5.68E6  
T: FTMS + p ESI Full ms [80.00-1000.00]

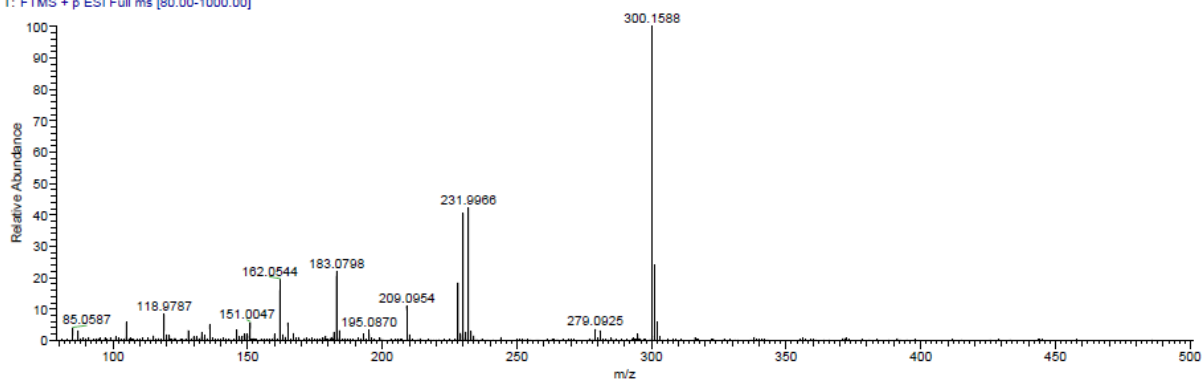

**Figure 45.** HR-MS of C4N4Sippy ligand.

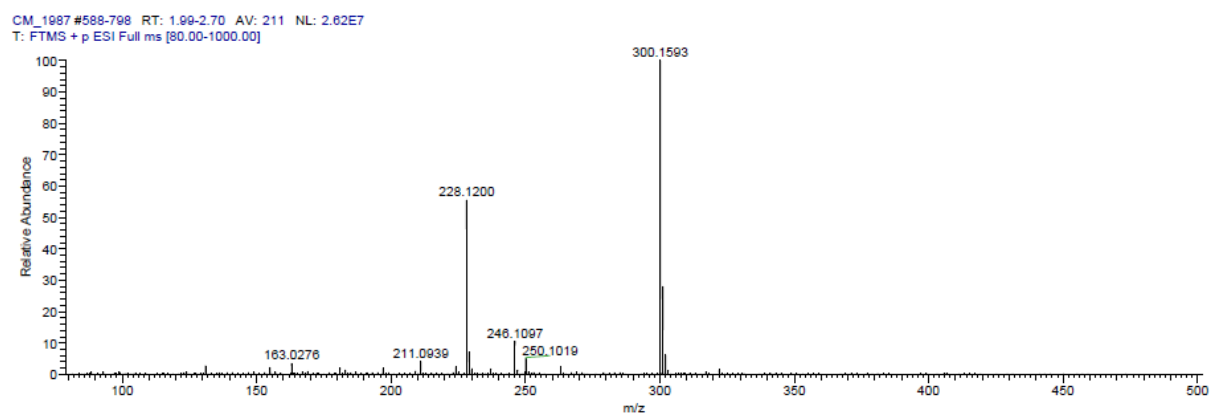

**Figure 46.** HR-MS of C4N5Sippy ligand.

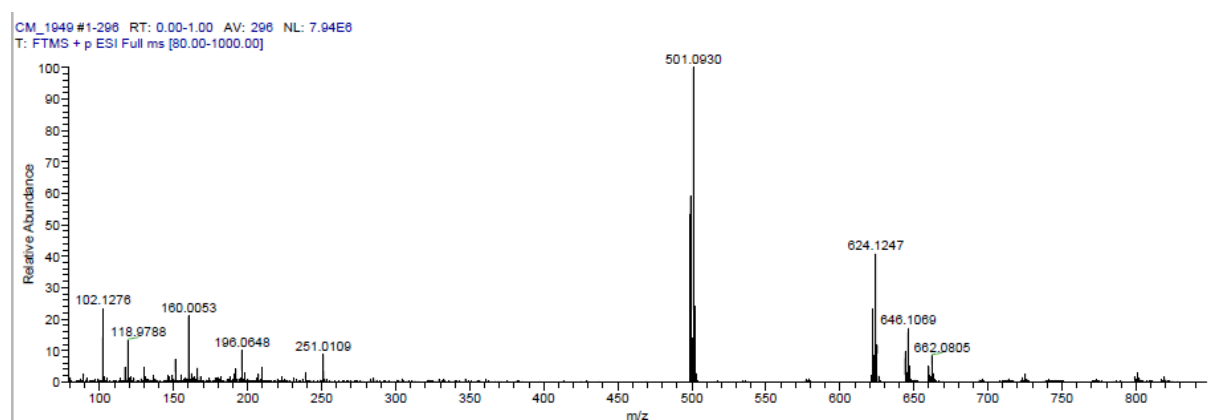

**Figure 47.** HR-MS of IrPic.

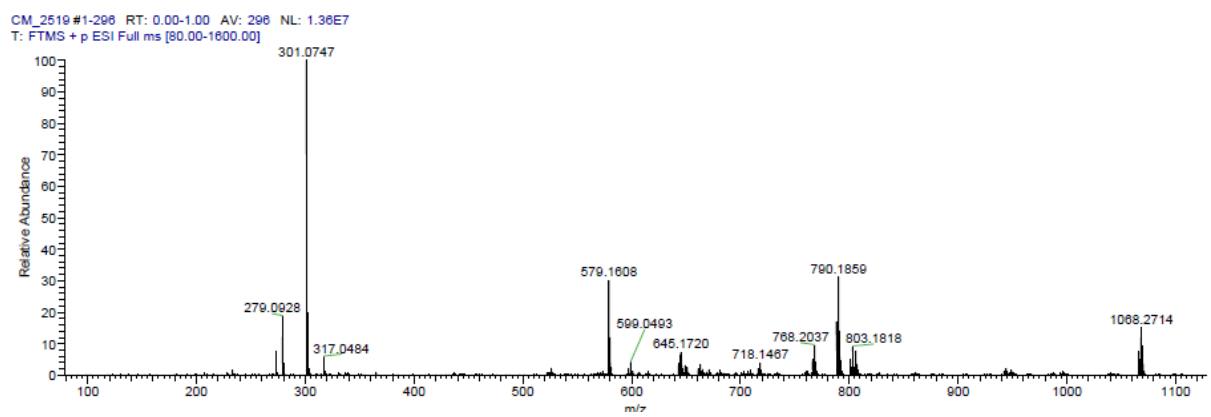

**Figure 48.** HR-MS of C3.

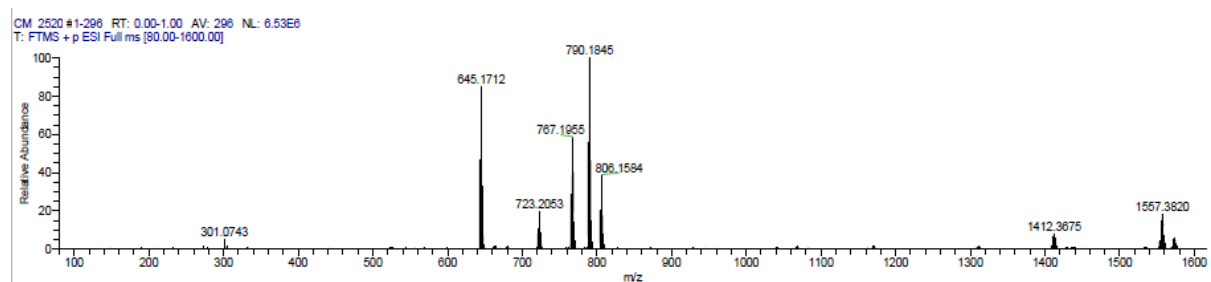

**Figure 49.** HR-MS of C4.

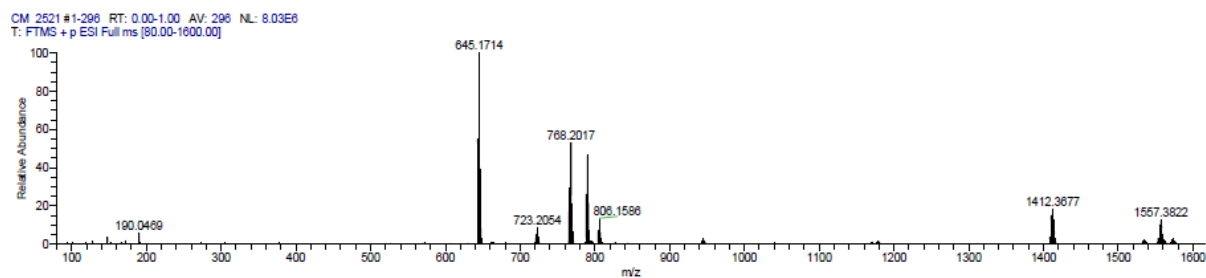

**Figure 50.** HR-MS of N4.

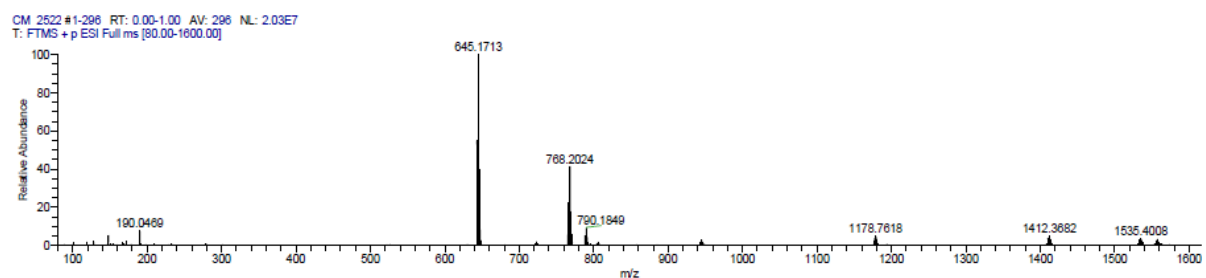

**Figure 51.** HR-MS of N5.

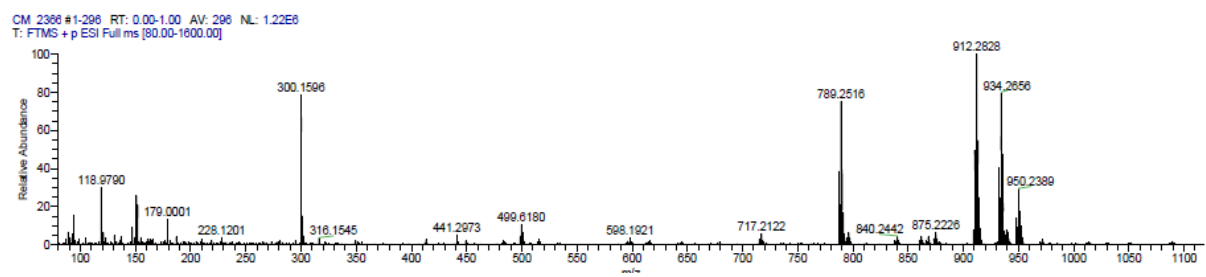

**Figure 52.** HR-MS of C3N4.

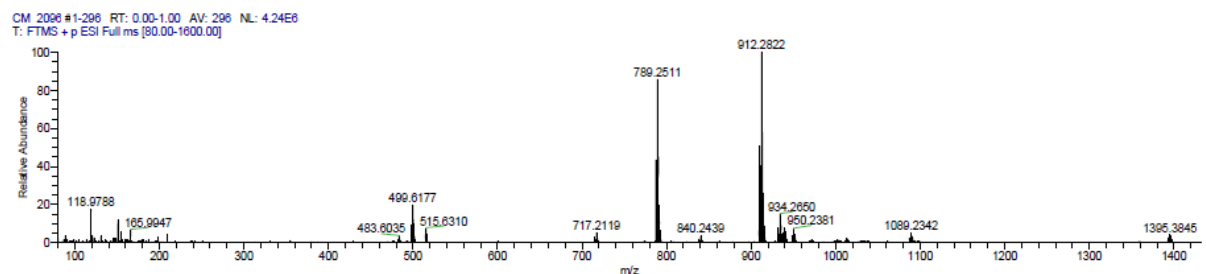

**Figure 53.** HR-MS of C3N5.

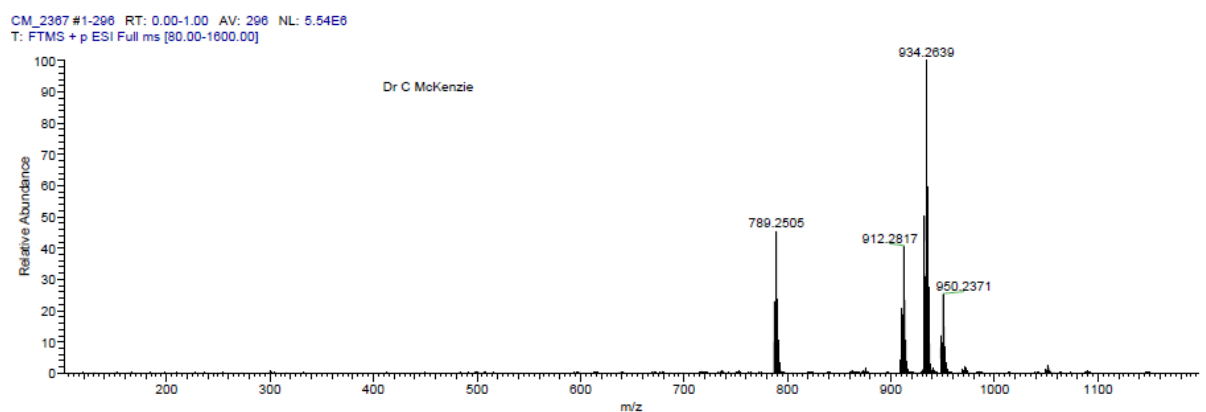

**Figure 54.** HR-MS of C4N4.

CM 2365 #1-296 RT: 0.00-1.00 AV: 296 NL: 8.78E6  
T: FTMS + p ESI Full ms [80.00-1600.00]

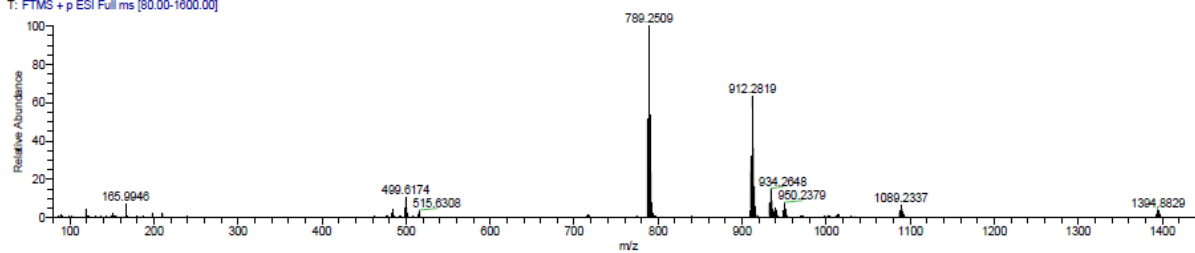

**Figure 55.** HR-MS of C4N5.

## Photophysics

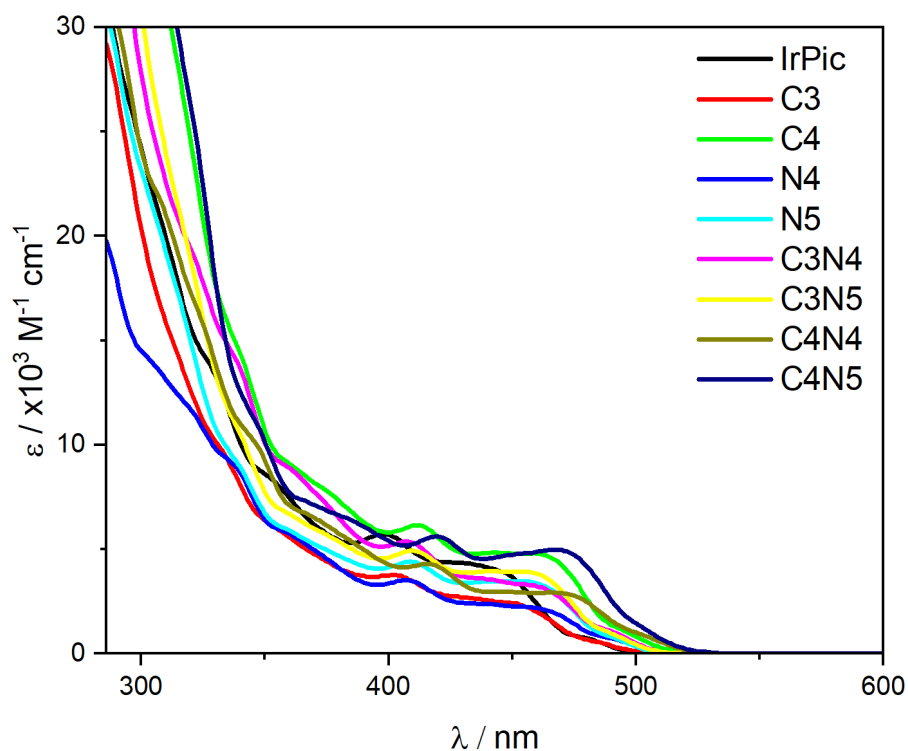

**Figure S56.** Absorption spectra of the 8 trimethylsilyl-substituted complexes and IrPic in toluene solution.

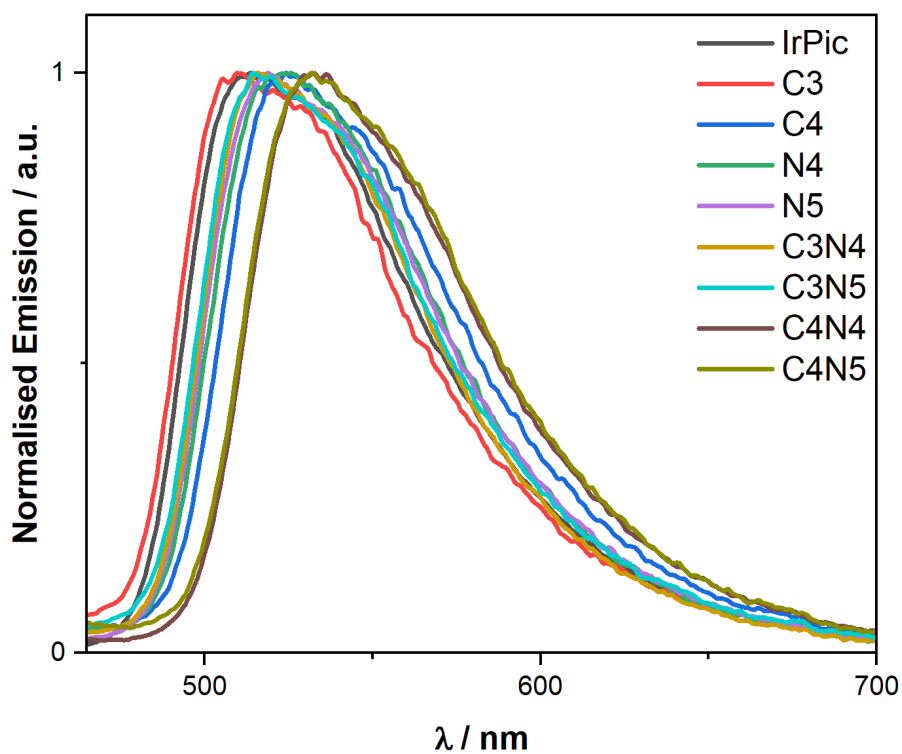

**Figure S57.** PL spectra of in 10 wt% doped films of the iridium complexes in mCBP (spin-coated from chlorobenzene),  $\lambda_{\text{exc}} = 340 \text{ nm}$ .

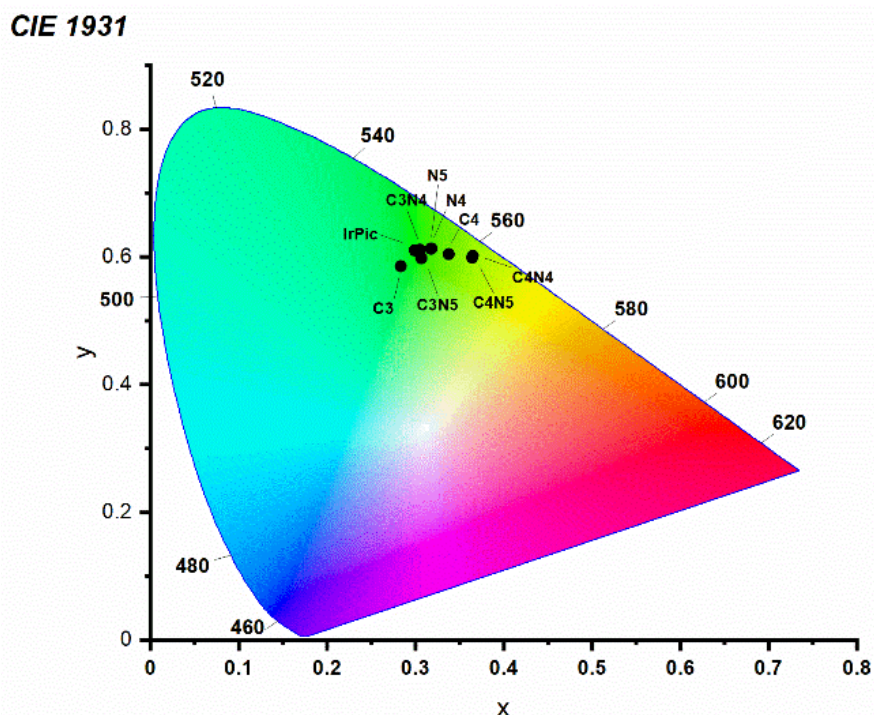

**Figure S58.** CIE diagram for the emission of the complexes in doped films (10 wt% in *m*CBP, spin-coated from chlorobenzene), ( $\lambda_{\text{exc}} = 340$  nm).

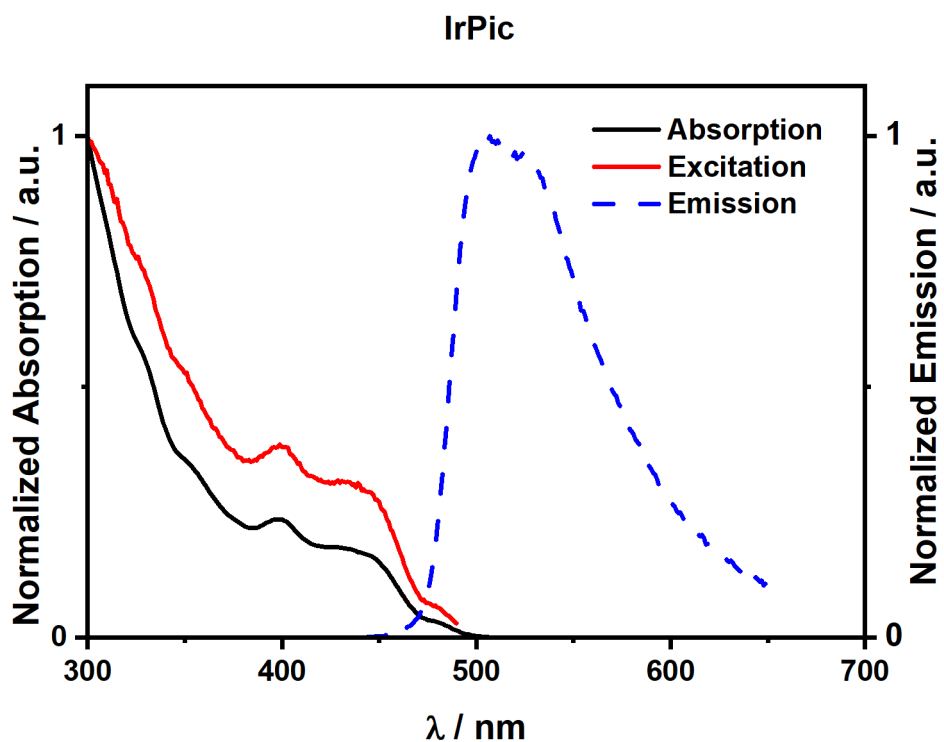

**Figure 59.** Plots of the normalised absorption, excitation ( $\lambda_{\text{em}} = 510$  nm) and emission ( $\lambda_{\text{exc}} = 400$  nm) of IrPic in dichloromethane solution.

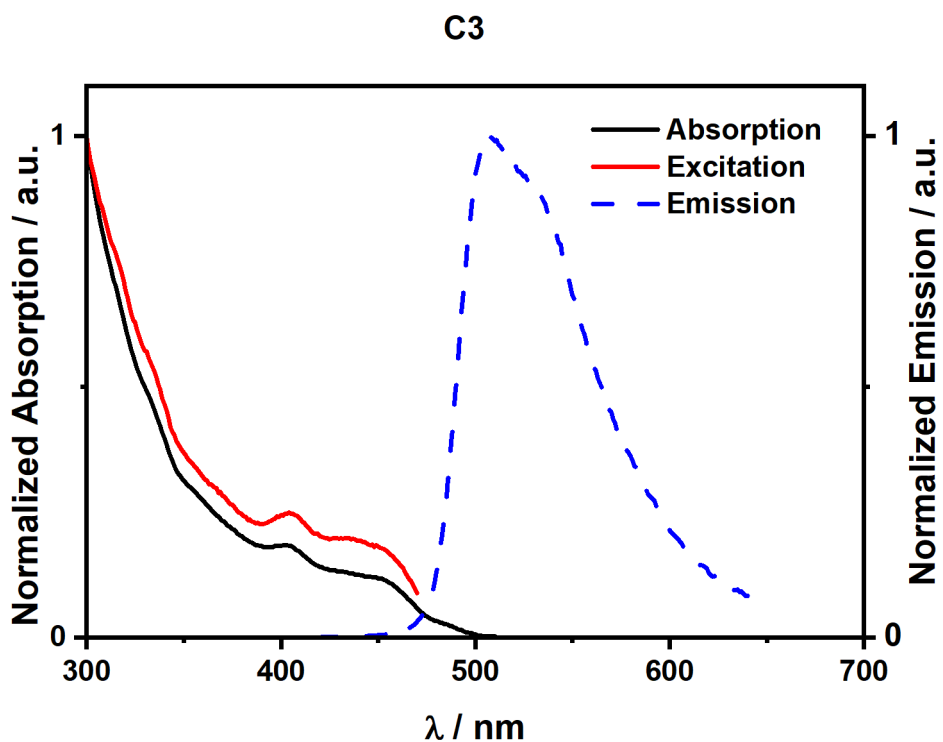

**Figure 60.** Plots of the normalised absorption, excitation ( $\lambda_{\text{em}} = 510 \text{ nm}$ ) and emission ( $\lambda_{\text{exc}} = 400 \text{ nm}$ ) of C3 in toluene solution.

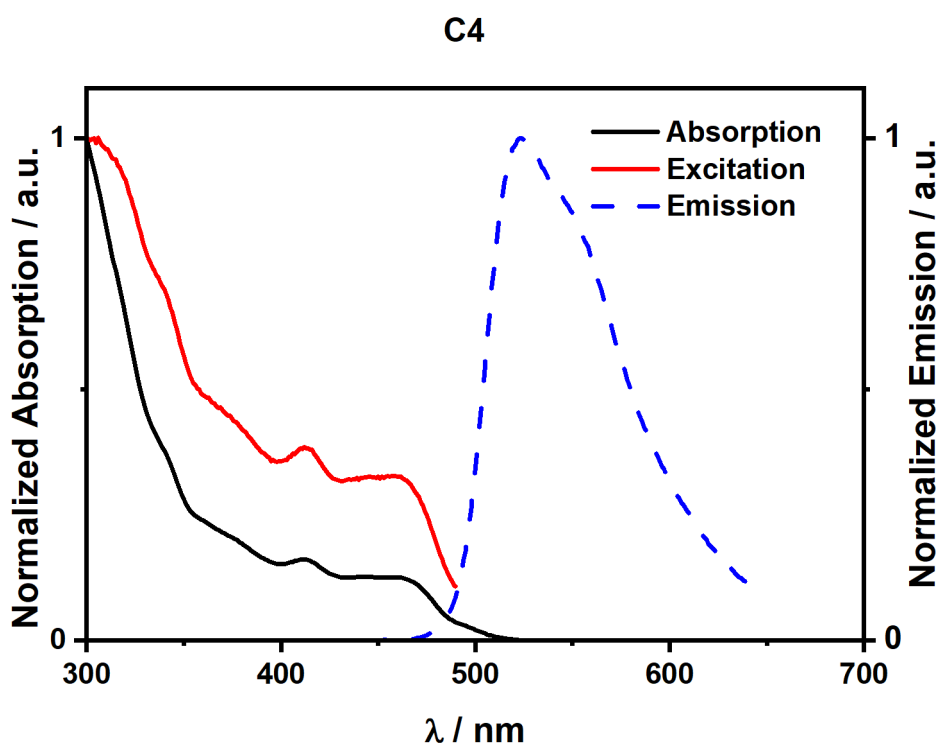

**Figure 61.** Plots of the normalised absorption, excitation ( $\lambda_{\text{em}} = 510 \text{ nm}$ ) and emission ( $\lambda_{\text{exc}} = 400 \text{ nm}$ ) of C4 in toluene solution.



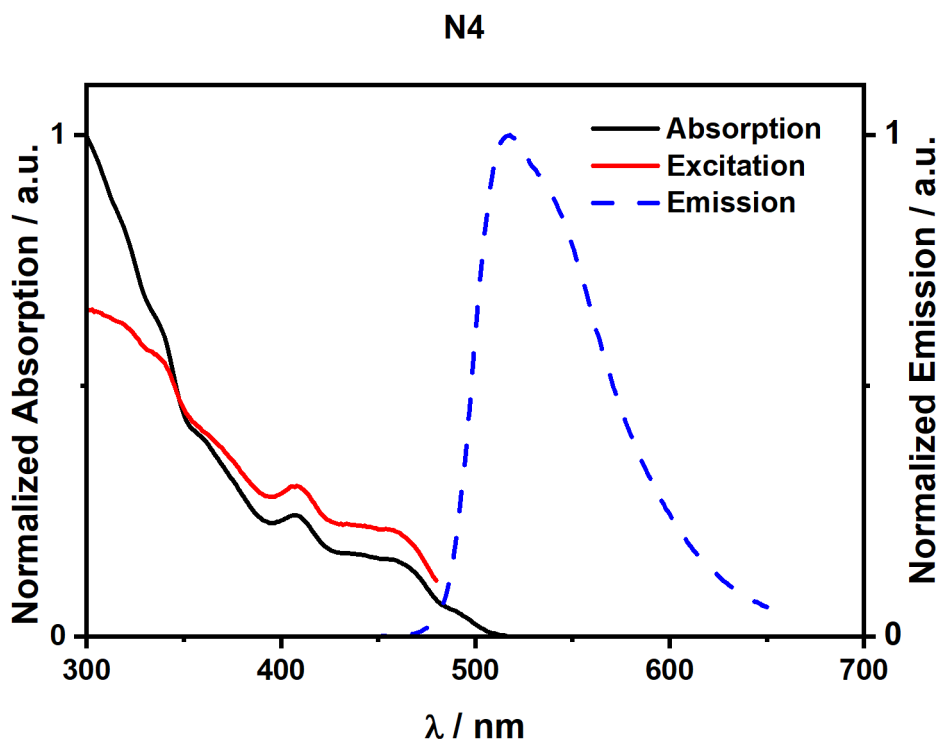

**Figure 62.** Plots of the normalised absorption, excitation ( $\lambda_{\text{em}} = 510 \text{ nm}$ ) and emission ( $\lambda_{\text{exc}} = 400 \text{ nm}$ ) of N4 in toluene solution.

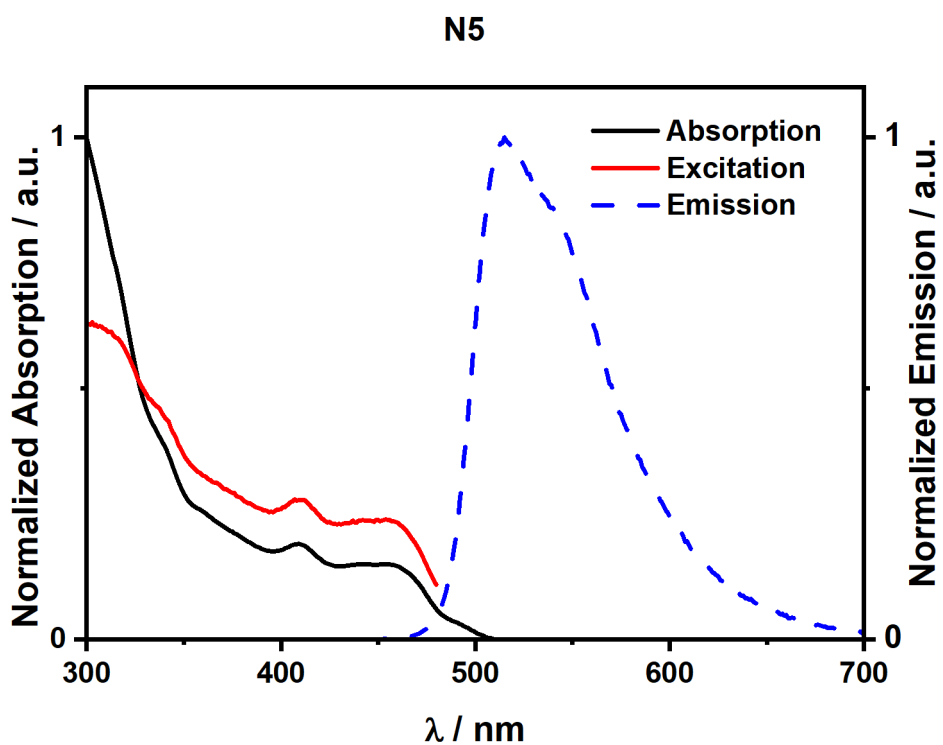

**Figure 63.** Plots of the normalised absorption, excitation ( $\lambda_{\text{em}} = 510 \text{ nm}$ ) and emission ( $\lambda_{\text{exc}} = 400 \text{ nm}$ ) of N5 in toluene solution.

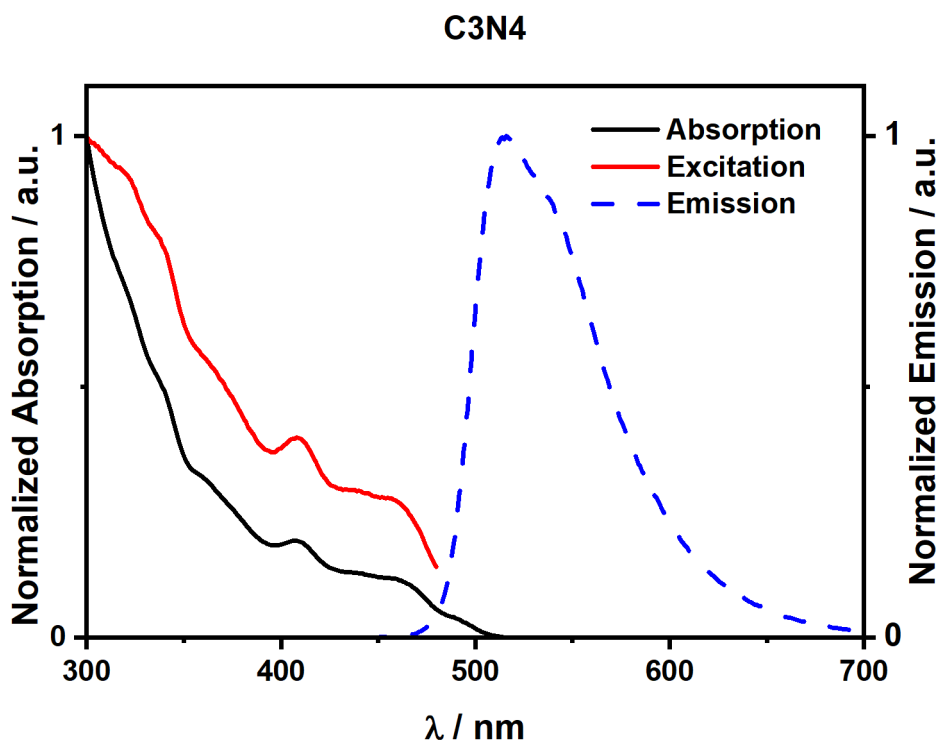

**Figure 64.** Plots of the normalised absorption, excitation ( $\lambda_{\text{em}} = 510 \text{ nm}$ ) and emission ( $\lambda_{\text{exc}} = 400 \text{ nm}$ ) of C3N4 in toluene solution.

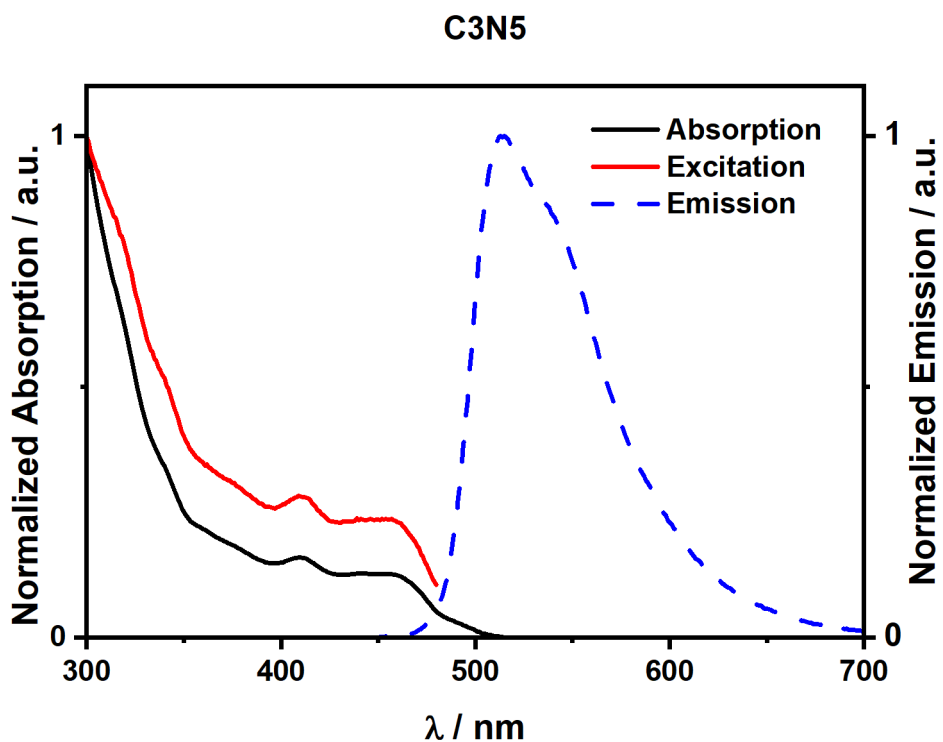

**Figure 65.** Plots of the normalised absorption, excitation ( $\lambda_{\text{em}} = 510 \text{ nm}$ ) and emission ( $\lambda_{\text{exc}} = 400 \text{ nm}$ ) of C3N5 in toluene solution.

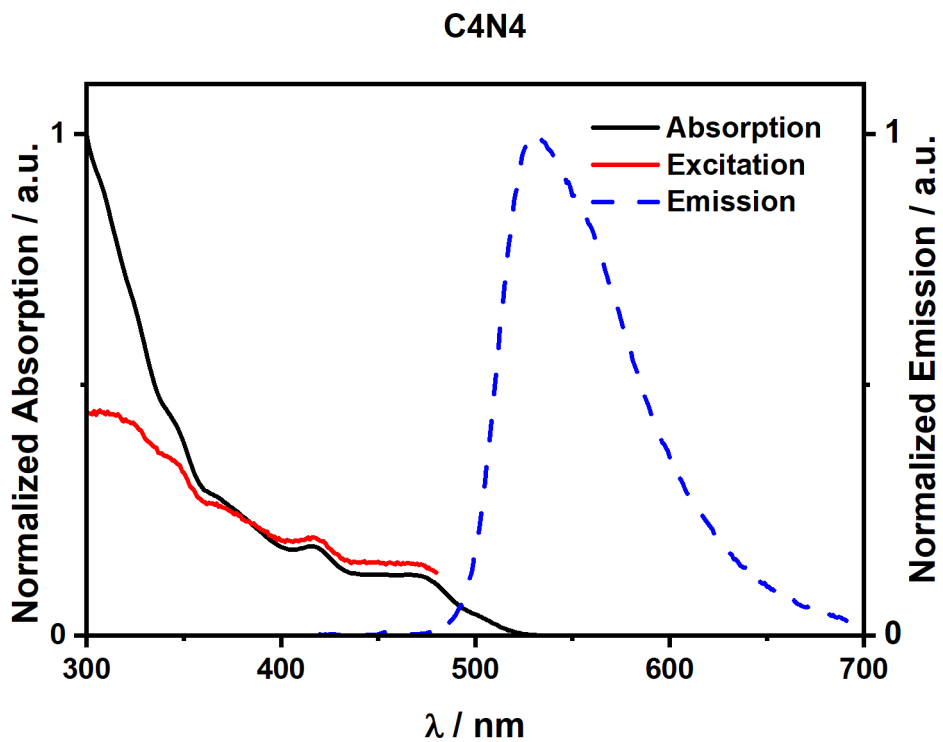

**Figure 66.** Plots of the normalised absorption, excitation ( $\lambda_{em} = 510$  nm) and emission ( $\lambda_{exc} = 400$  nm) of C4N4 in toluene solution.

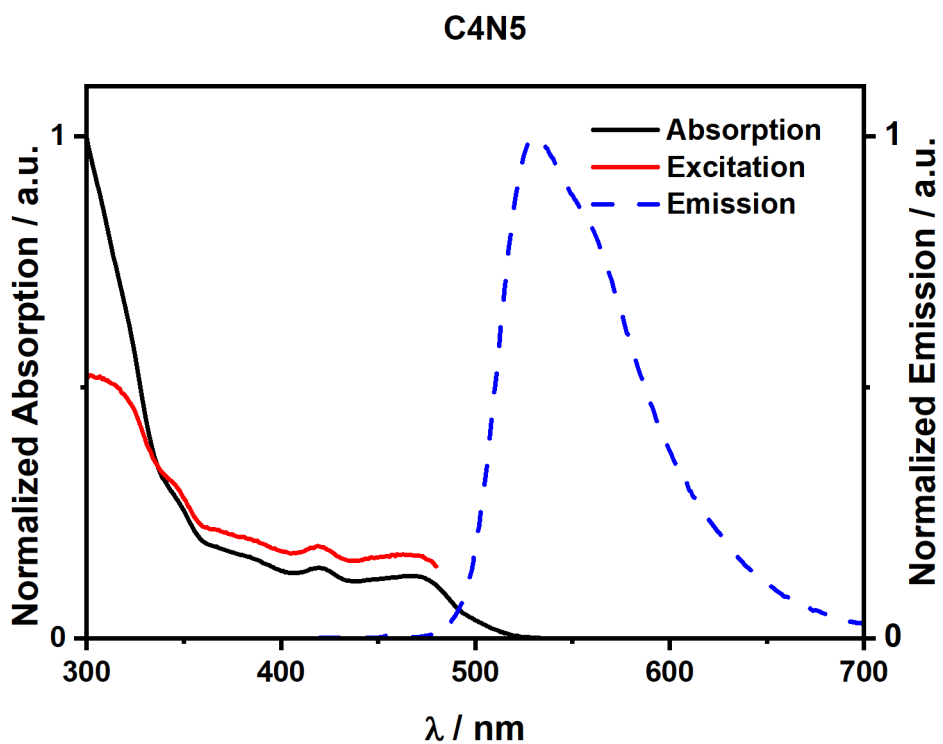

**Figure 67.** Plots of the normalised absorption, excitation ( $\lambda_{em} = 510$  nm) and emission ( $\lambda_{exc} = 400$  nm) of **C4N5** in toluene solution.

## DFT Calculations

**Table S1.** Plots of the HOMO and LUMO orbitals for each of the complexes.

| Complex | HOMO                                                                                | LUMO                                                                                 |
|---------|-------------------------------------------------------------------------------------|--------------------------------------------------------------------------------------|
| IrPic   | 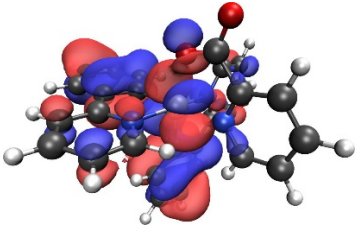   |    |
| C3      |    |    |
| C4      |   |   |
| N4      |  |  |
| N5      |  |  |

|      |                                                                                     |                                                                                      |
|------|-------------------------------------------------------------------------------------|--------------------------------------------------------------------------------------|
| C3N4 | 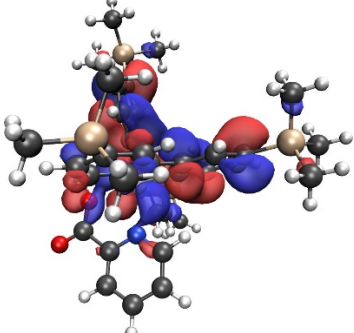   |    |
| C3N5 |    |    |
| C4N4 |   |   |
| C4N5 |  |  |

**Table S2.** Excited state transitions for each of the complexes from TD-DFT calculations.

| Complex | State          | Energy / eV | Wavelength / nm | Oscillator strength ( <i>f</i> ) | Transition               | Contribution / % |
|---------|----------------|-------------|-----------------|----------------------------------|--------------------------|------------------|
| IrPic   | T <sub>1</sub> | 2.6522      | 467.48          | 0                                | HOMO→LUMO+1              | 69               |
|         | T <sub>2</sub> | 2.7141      | 456.82          | 0                                | HOMO→LUMO+2              | 69               |
|         | T <sub>3</sub> | 2.8636      | 432.97          | 0                                | HOMO→LUMO                | 86               |
|         | S <sub>1</sub> | 2.8932      | 428.54          | 0.013                            | HOMO→LUMO                | 98               |
|         | S <sub>2</sub> | 2.9265      | 423.66          | 0.1086                           | HOMO→LUMO+1              | 97               |
|         | S <sub>3</sub> | 3.0471      | 406.89          | 0.0023                           | HOMO→LUMO+2              | 97               |
| C3      | T <sub>1</sub> | 2.6591      | 466.26          | 0                                | HOMO→LUMO+1              | 71               |
|         | T <sub>2</sub> | 2.7208      | 455.69          | 0                                | HOMO→LUMO+2              | 68               |
|         | T <sub>3</sub> | 2.8454      | 435.74          | 0                                | HOMO→LUMO                | 89               |
|         | S <sub>1</sub> | 2.8743      | 431.35          | 0.0082                           | HOMO→LUMO                | 98               |
|         | S <sub>2</sub> | 2.9234      | 424.11          | 0.1078                           | HOMO→LUMO+1              | 97               |
|         | S <sub>3</sub> | 3.0427      | 407.48          | 0.0024                           | HOMO→LUMO+2              | 97               |
| C4      | T <sub>1</sub> | 2.5939      | 477.98          | 0                                | HOMO→LUMO+1<br>HOMO→LUMO | 52<br>27         |
|         | T <sub>2</sub> | 2.6661      | 465.04          | 0                                | HOMO→LUMO+2              | 68               |
|         | T <sub>3</sub> | 2.8494      | 435.12          | 0                                | HOMO→LUMO<br>HOMO→LUMO+1 | 64<br>34         |
|         | S <sub>1</sub> | 2.858       | 433.81          | 0.1146                           | HOMO→LUMO<br>HOMO→LUMO+1 | 67<br>31         |
|         | S <sub>2</sub> | 2.8849      | 429.77          | 0.0144                           | HOMO→LUMO+1<br>HOMO→LUMO | 67<br>31         |
|         | S <sub>3</sub> | 3.0023      | 412.96          | 0.0028                           | HOMO→LUMO+2              | 97               |
| N4      | T <sub>1</sub> | 2.6522      | 467.48          | 0                                | HOMO→LUMO+1              | 71               |
|         | T <sub>2</sub> | 2.7125      | 457.08          | 0                                | HOMO→LUMO+2              | 68               |
|         | T <sub>3</sub> | 2.845       | 435.8           | 0                                | HOMO→LUMO                | 89               |
|         | S <sub>1</sub> | 2.8766      | 431.01          | 0.0053                           | HOMO→LUMO                | 96               |
|         | S <sub>2</sub> | 2.9138      | 425.51          | 0.1128                           | HOMO→LUMO+1              | 95               |
|         | S <sub>3</sub> | 3.0266      | 409.65          | 0.0026                           | HOMO→LUMO+2              | 97               |
| N5      | T <sub>1</sub> | 2.6294      | 471.53          | 0                                | HOMO→LUMO+1              | 62               |
|         | T <sub>2</sub> | 2.6936      | 460.29          | 0                                | HOMO→LUMO+2              | 68               |
|         | T <sub>3</sub> | 2.8396      | 436.63          | 0                                | HOMO→LUMO                | 79               |
|         | S <sub>1</sub> | 2.8625      | 433.13          | 0.0278                           | HOMO→LUMO                | 98               |
|         | S <sub>2</sub> | 2.9158      | 425.22          | 0.1236                           | HOMO→LUMO+1              | 97               |
|         | S <sub>3</sub> | 3.0369      | 408.26          | 0.0082                           | HOMO→LUMO+2              | 97               |
| C3N4    | T <sub>1</sub> | 2.6581      | 466.44          | 0                                | HOMO→LUMO+1              | 72               |
|         | T <sub>2</sub> | 2.7191      | 455.98          | 0                                | HOMO→LUMO+2              | 68               |
|         | T <sub>3</sub> | 2.8283      | 438.37          | 0                                | HOMO→LUMO                | 90               |
|         | S <sub>1</sub> | 2.8587      | 433.71          | 0.0052                           | HOMO→LUMO                | 97               |
|         | S <sub>2</sub> | 2.9097      | 426.11          | 0.1075                           | HOMO→LUMO+1              | 96               |
|         | S <sub>3</sub> | 3.021       | 410.41          | 0.0024                           | HOMO→LUMO+2              | 97               |
| C3N5    | T <sub>1</sub> | 2.6427      | 469.16          | 0                                | HOMO→LUMO+1              | 62               |
|         | T <sub>2</sub> | 2.7053      | 458.3           | 0                                | HOMO→LUMO+2              | 66               |
|         | T <sub>3</sub> | 2.821       | 439.5           | 0                                | HOMO→LUMO                | 81               |

|      |                |        |        |        |                          |          |
|------|----------------|--------|--------|--------|--------------------------|----------|
|      | S <sub>1</sub> | 2.8428 | 436.13 | 0.0182 | HOMO→LUMO                | 98       |
|      | S <sub>2</sub> | 2.9219 | 424.33 | 0.1293 | HOMO→LUMO+1              | 97       |
|      | S <sub>3</sub> | 3.0399 | 407.86 | 0.0058 | HOMO→LUMO+2              | 97       |
| C4N4 | T <sub>1</sub> | 2.5824 | 480.11 | 0      | HOMO→LUMO<br>HOMO→LUMO+1 | 42<br>37 |
|      | T <sub>2</sub> | 2.6745 | 463.58 | 0      | HOMO→LUMO+2              | 62       |
|      | S <sub>1</sub> | 2.8358 | 437.21 | 0.1237 | HOMO→LUMO<br>HOMO→LUMO+1 | 70<br>28 |
|      | T <sub>3</sub> | 2.8488 | 435.22 | 0      | HOMO→LUMO+1<br>HOMO→LUMO | 52<br>45 |
|      | S <sub>2</sub> | 2.8831 | 430.04 | 0.0043 | HOMO→LUMO+1<br>HOMO→LUMO | 70<br>28 |
|      | S <sub>3</sub> | 3.0026 | 412.92 | 0.0016 | HOMO→LUMO+2              | 97       |
| C4N5 | T <sub>1</sub> | 2.5577 | 484.75 | 0      | HOMO→LUMO<br>HOMO→LUMO+1 | 46<br>35 |
|      | T <sub>2</sub> | 2.6242 | 472.46 | 0      | HOMO→LUMO+2              | 71       |
|      | S <sub>1</sub> | 2.8024 | 442.42 | 0.1229 | HOMO→LUMO                | 94       |
|      | T <sub>3</sub> | 2.8188 | 439.85 | 0      | HOMO→LUMO+1<br>HOMO→LUMO | 53<br>45 |
|      | S <sub>2</sub> | 2.8676 | 432.36 | 0.0529 | HOMO→LUMO+1              | 93       |
|      | S <sub>3</sub> | 2.9459 | 420.87 | 0.0031 | HOMO→LUMO+2              | 97       |

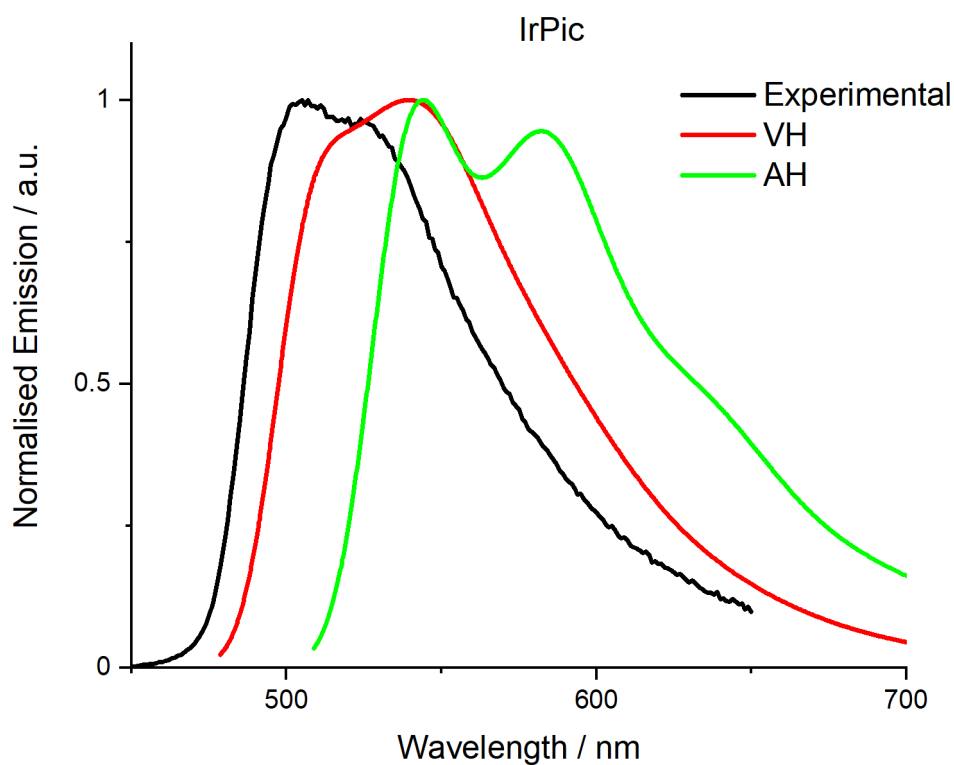

**Figure S68.** Comparison of experimental (degassed toluene solution) and calculated emission spectra (VH and AH methods) for IrPic.



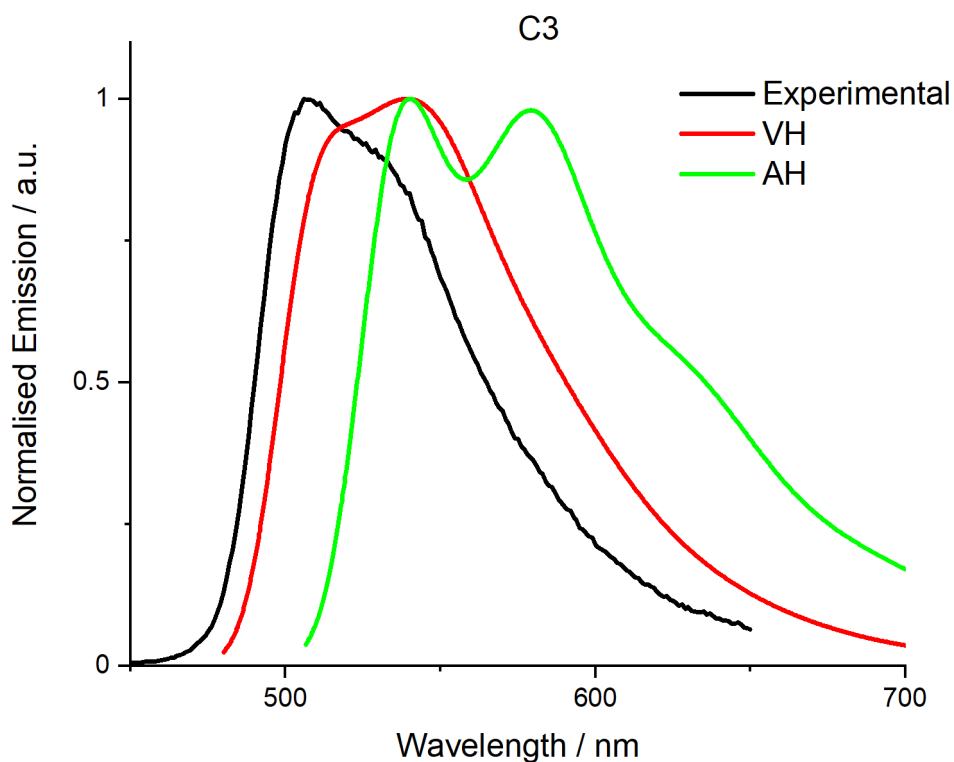

**Figure S69.** Comparison of experimental (degassed toluene solution) and calculated emission spectra (VH and AH, using silane model complex, methods) for **C3**.

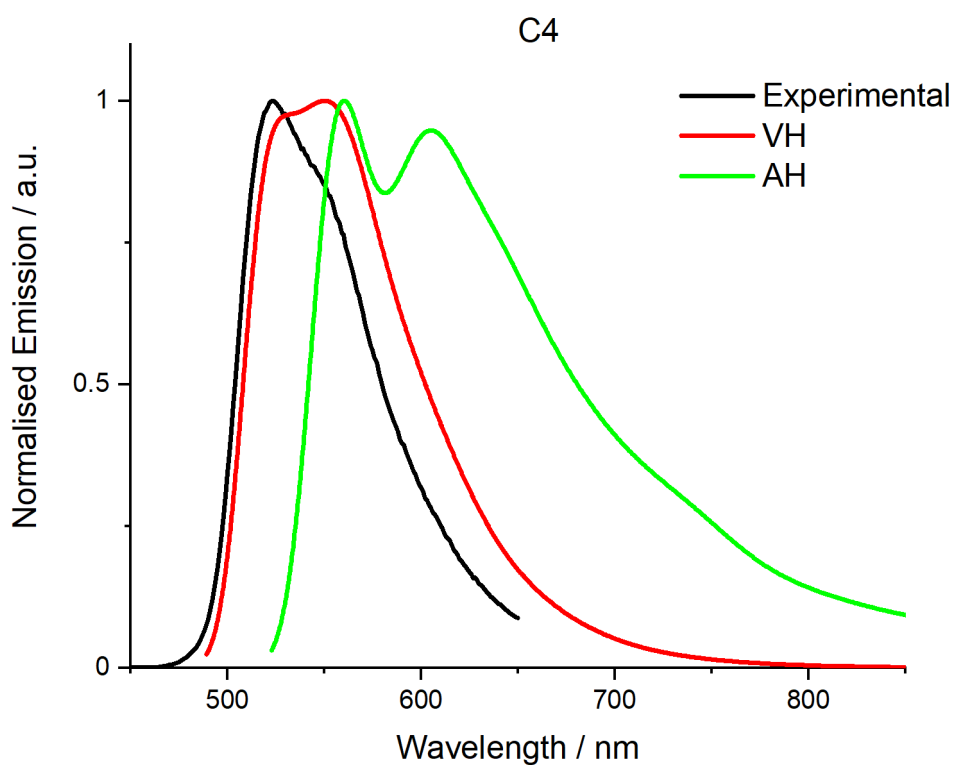

**Figure S70.** Comparison of experimental (degassed toluene solution) and calculated emission spectra (VH and AH, using silane model complex, methods) for **C4**.

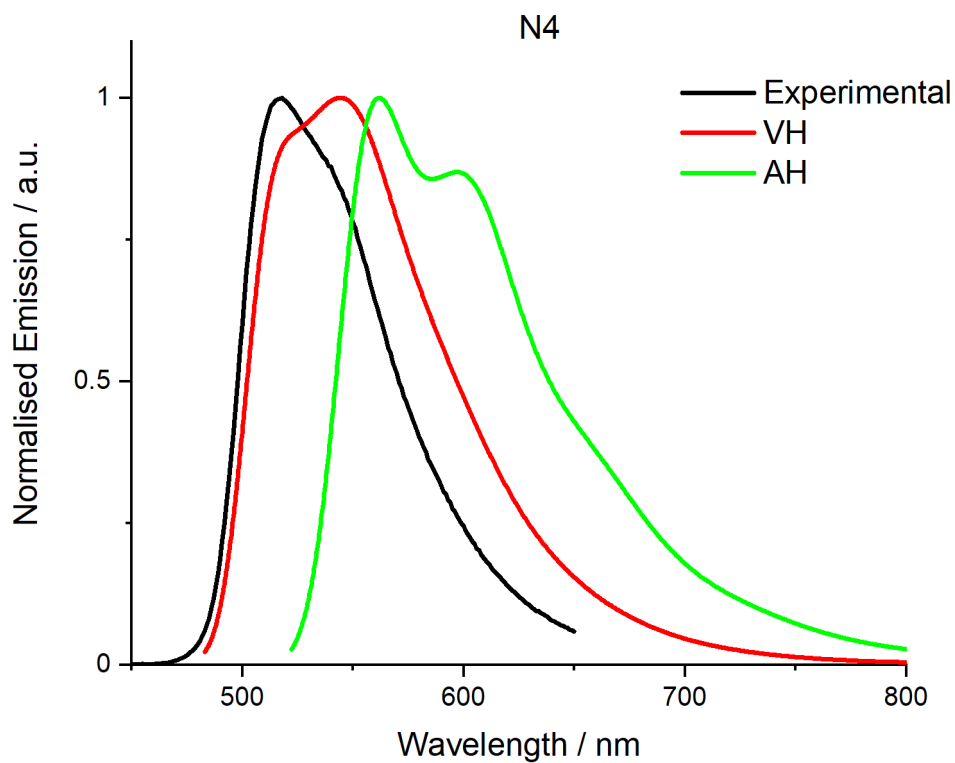

**Figure S71.** Comparison of experimental (degassed toluene solution) and calculated emission spectra (VH and AH, using silane model complex, methods) for N4.

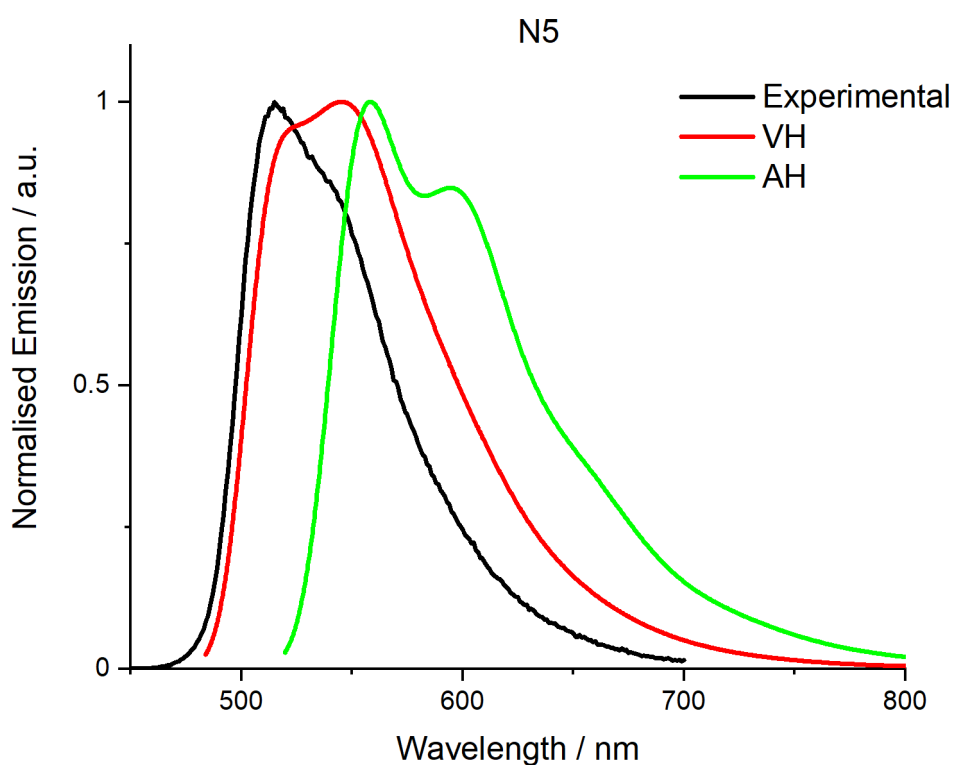

**Figure S72.** Comparison of experimental (degassed toluene solution) and calculated emission spectra (VH and AH, using silane model complex, methods) for N5.

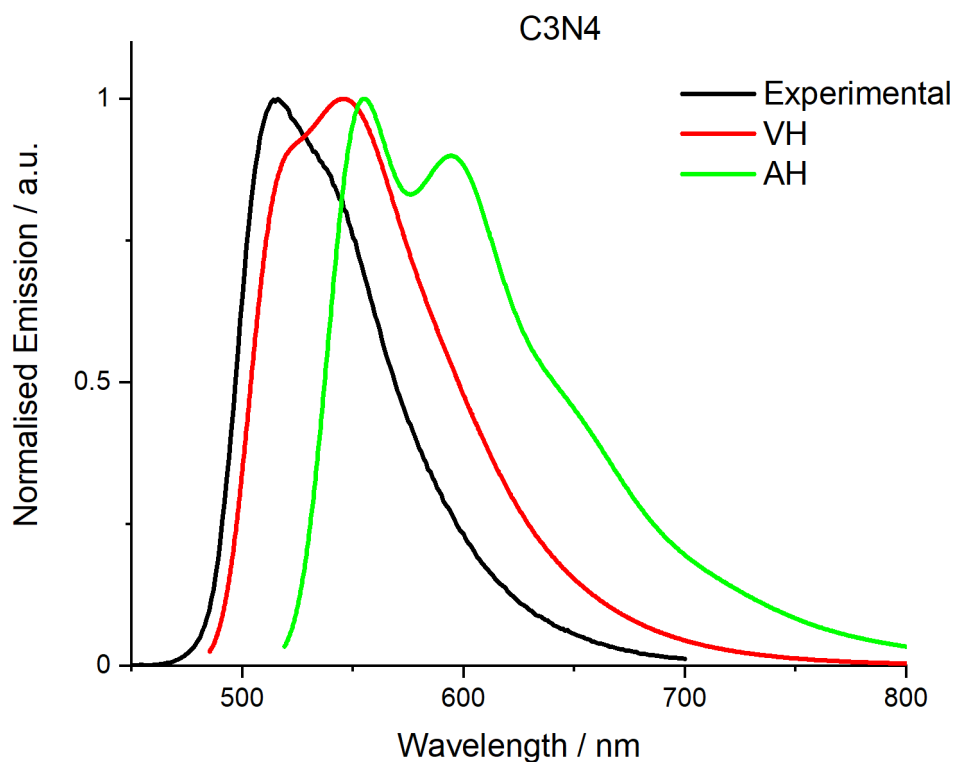

**Figure S73.** Comparison of experimental (degassed toluene solution) and calculated emission spectra (VH and AH, using silane model complex, methods) for **C3N4**.

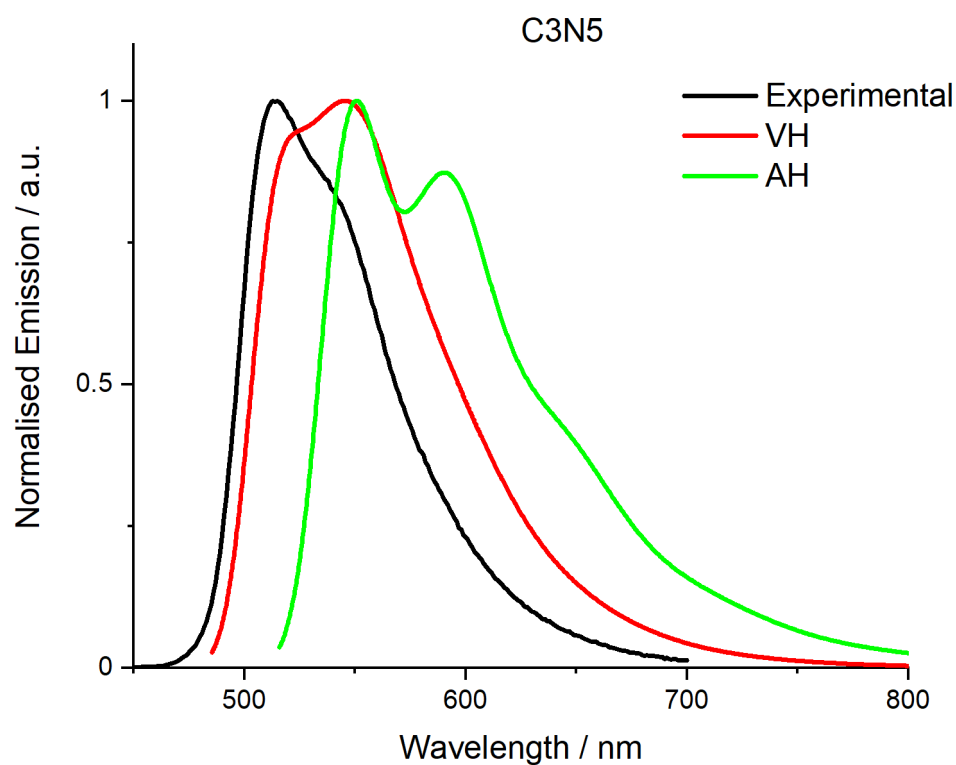

**Figure S74.** Comparison of experimental (degassed toluene solution) and calculated emission spectra (VH and AH, using silane model complex, methods) for **C3N5**.

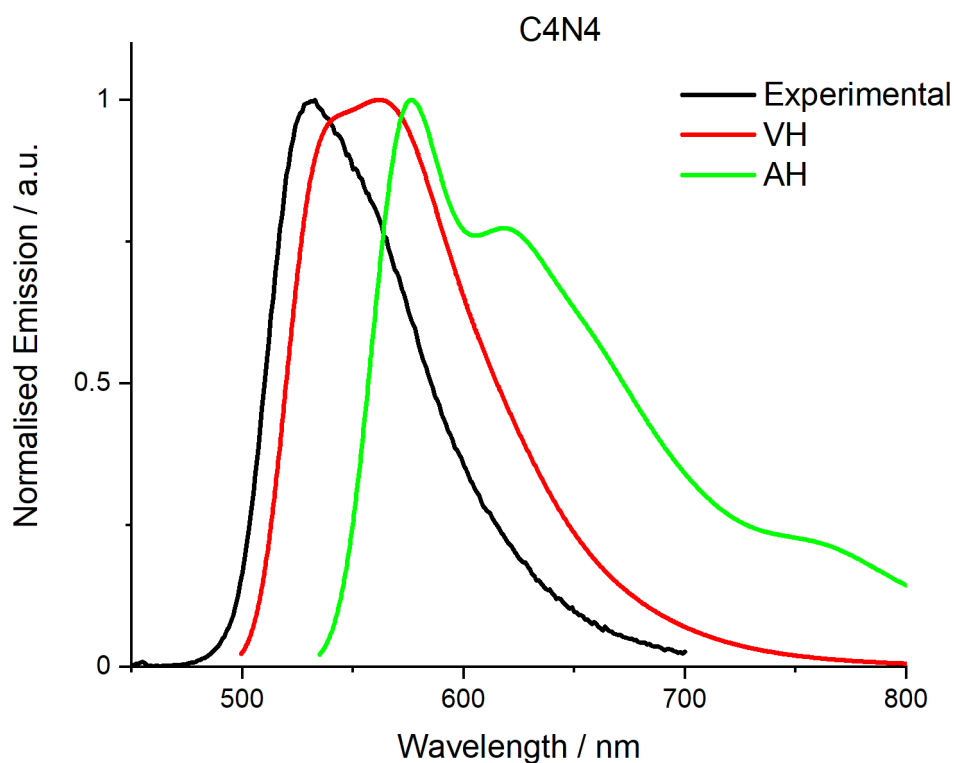

**Figure S75.** Comparison of experimental (degassed toluene solution) and calculated emission spectra (VH and AH, using silane model complex, methods) for **C4N4**.

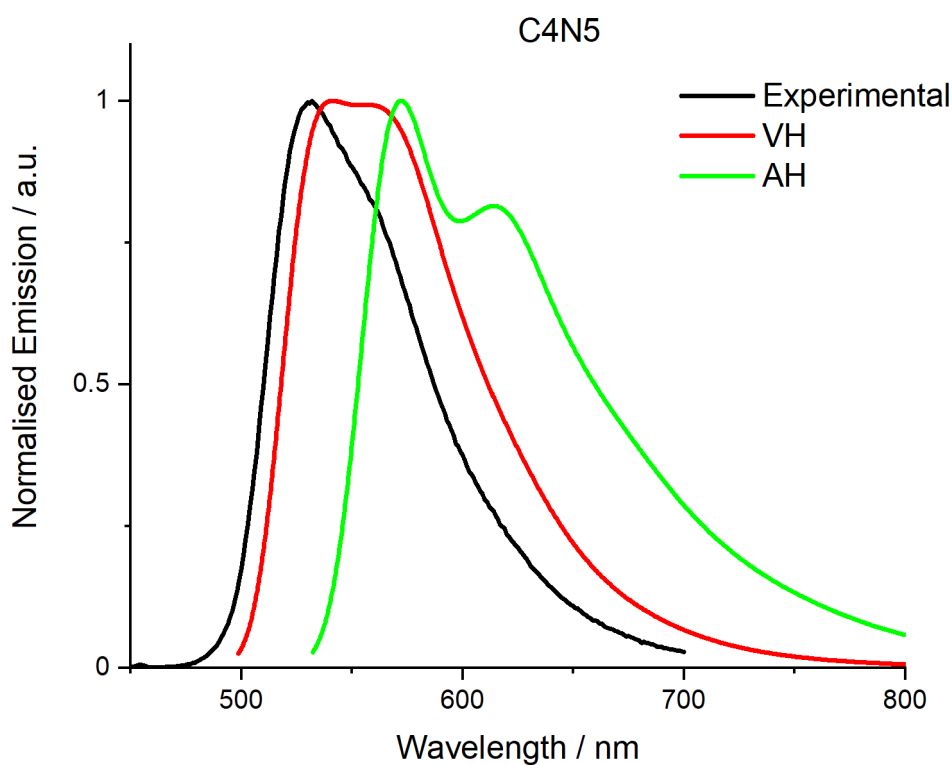

**Figure S76.** Comparison of experimental (degassed toluene solution) and calculated emission spectra (VH and AH, using silane model complex, methods) for **C4N5**.

**Table S3.** Information on the dipole transitions in the vibrational spectra of the reference complexes (*fac*-Ir(ppy)<sub>3</sub>, Ir(ppy)<sub>2</sub>(pic) and Ir(ppy)<sub>2</sub>(acac)) calculated by the AH method, a dipole strength of 0.002 was used as a cut-off for the reported transitions.

| Complex                               | Energy / cm <sup>-1</sup> | Transition    | Intensity | Dipolar Strength |
|---------------------------------------|---------------------------|---------------|-----------|------------------|
| <i>fac</i> -Ir(ppy) <sub>3</sub>      | -1648                     | 0>-> 153^1>-> | 0.4514    | 0.00346          |
|                                       | -1629                     | 0>-> 150^1>-> | 0.3101    | 0.00237          |
|                                       | -1626                     | 0>-> 148^1>-> | 0.4979    | 0.00380          |
|                                       | -1588                     | 0>-> 144^1>-> | 0.3651    | 0.00276          |
|                                       | -1588                     | 0>-> 143^1>-> | 0.5455    | 0.00412          |
|                                       | -1588                     | 0>-> 142^1>-> | 0.2872    | 0.00217          |
|                                       | -1512                     | 0>-> 141^1>-> | 1.256     | 0.00933          |
|                                       | -1509                     | 0>-> 139^1>-> | 0.5961    | 0.00442          |
|                                       | -1486                     | 0>-> 137^1>-> | 0.4514    | 0.00333          |
|                                       | -1486                     | 0>-> 136^1>-> | 0.405     | 0.00299          |
|                                       | -1344                     | 0>-> 128^1>-> | 0.4746    | 0.00339          |
|                                       | -1333                     | 0>-> 126^1>-> | 0.3173    | 0.00226          |
|                                       | -1332                     | 0>-> 125^1>-> | 0.3655    | 0.00260          |
|                                       | -1331                     | 0>-> 124^1>-> | 0.439     | 0.00313          |
|                                       | -1185                     | 0>-> 113^1>-> | 0.4777    | 0.00329          |
|                                       | -1059                     | 0>-> 96^1>->  | 0.4346    | 0.00291          |
|                                       | -1048                     | 0>-> 95^1>->  | 1.11      | 0.00742          |
|                                       | -1042                     | 0>-> 92^1>->  | 0.3852    | 0.00257          |
|                                       | -1041                     | 0>-> 91^1>->  | 0.3478    | 0.00232          |
|                                       | -1030                     | 0>-> 90^1>->  | 0.6846    | 0.00455          |
|                                       | -776                      | 0>-> 65^1>->  | 0.8078    | 0.00507          |
|                                       | -687                      | 0>-> 54^1>->  | 0.6257    | 0.00385          |
|                                       | -680                      | 0>-> 53^1>->  | 0.4281    | 0.00263          |
|                                       | -309                      | 0>-> 27^1>->  | 0.5928    | 0.00336          |
|                                       | -277                      | 0>-> 22^1>->  | 0.7306    | 0.00411          |
|                                       | -263                      | 0>-> 21^1>->  | 0.9719    | 0.00545          |
|                                       | -231                      | 0>-> 19^1>->  | 0.3892    | 0.00217          |
|                                       | -125                      | 0>-> 12^1>->  | 0.4897    | 0.00267          |
|                                       | -46                       | 0>-> 6^1>->   | 0.4695    | 0.00252          |
|                                       | -40                       | 0>-> 5^1>->   | 1.98      | 0.01059          |
| -39                                   | 0>-> 4^1>->               | 1.815         | 0.00971   |                  |
| -29                                   | 0>-> 3^1>->               | 1.346         | 0.00718   |                  |
| 0                                     | 0>-> 0>->                 | 13.81         | 0.07321   |                  |
| Ir(ppy) <sub>2</sub> (pic)<br>(IrPic) | -1654                     | 0>-> 134^1>-> | 0.4304    | 0.003364         |
|                                       | -1631                     | 0>-> 132^1>-> | 0.4101    | 0.003188         |
|                                       | -1628                     | 0>-> 131^1>-> | 0.3525    | 0.002738         |
|                                       | -1593                     | 0>-> 126^1>-> | 1.193     | 0.009191         |
|                                       | -1518                     | 0>-> 125^1>-> | 0.9161    | 0.006935         |
|                                       | -1515                     | 0>-> 124^1>-> | 0.7846    | 0.005937         |
|                                       | -1490                     | 0>-> 121^1>-> | 0.4273    | 0.003214         |

|                                  |       |                                                       |        |          |
|----------------------------------|-------|-------------------------------------------------------|--------|----------|
|                                  | -1347 | $ 0\rangle \rightarrow  113^1\rangle \rightarrow$     | 0.3457 | 0.002516 |
|                                  | -1339 | $ 0\rangle \rightarrow  112^1\rangle \rightarrow$     | 0.7636 | 0.005546 |
|                                  | -1186 | $ 0\rangle \rightarrow  100^1\rangle \rightarrow$     | 0.5479 | 0.003842 |
|                                  | -1062 | $ 0\rangle \rightarrow  86^1\rangle \rightarrow$      | 0.8052 | 0.005488 |
|                                  | -1053 | $ 0\rangle \rightarrow  85^1\rangle \rightarrow$      | 0.6411 | 0.004361 |
|                                  | -1049 | $ 0\rangle \rightarrow  83^1\rangle \rightarrow$      | 0.3412 | 0.002319 |
|                                  | -779  | $ 0\rangle \rightarrow  60^1\rangle \rightarrow$      | 0.3207 | 0.002051 |
|                                  | -777  | $ 0\rangle \rightarrow  59^1\rangle \rightarrow$      | 0.4974 | 0.003180 |
|                                  | -691  | $ 0\rangle \rightarrow  49^1\rangle \rightarrow$      | 0.7451 | 0.004672 |
|                                  | -310  | $ 0\rangle \rightarrow  25^1\rangle \rightarrow$      | 1.329  | 0.007662 |
|                                  | -295  | $ 0\rangle \rightarrow  24^1\rangle \rightarrow$      | 0.5675 | 0.003261 |
|                                  | -259  | $ 0\rangle \rightarrow  20^1\rangle \rightarrow$      | 1.061  | 0.006052 |
|                                  | -223  | $ 0\rangle \rightarrow  19^1\rangle \rightarrow$      | 0.7834 | 0.004432 |
|                                  | -83   | $ 0\rangle \rightarrow  7^1\rangle \rightarrow$       | 1.468  | 0.008057 |
|                                  | -42   | $ 0\rangle \rightarrow  5^1\rangle \rightarrow$       | 1.95   | 0.010610 |
|                                  | -38   | $ 0\rangle \rightarrow  4^1\rangle \rightarrow$       | 0.6205 | 0.003373 |
|                                  | -34   | $ 0\rangle \rightarrow  3^1\rangle \rightarrow$       | 0.8908 | 0.004838 |
|                                  | -33   | $ 0\rangle \rightarrow  2^1\rangle \rightarrow$       | 0.3969 | 0.002155 |
|                                  | 0     | $ 0\rangle \rightarrow  0\rangle \rightarrow$         | 11.8   | 0.063610 |
| <b>Ir(ppy)<sub>2</sub>(acac)</b> | -1632 | $ 0\rangle \rightarrow  134^1\rangle \rightarrow$     | 0.3193 | 0.00266  |
|                                  | -1627 | $ 0\rangle \rightarrow  133^1\rangle \rightarrow$     | 0.2937 | 0.00244  |
|                                  | -1592 | $ 0\rangle \rightarrow  129^1\rangle \rightarrow$     | 0.5346 | 0.00441  |
|                                  | -1592 | $ 0\rangle \rightarrow  128^1\rangle \rightarrow$     | 0.4795 | 0.00395  |
|                                  | -1544 | $ 0\rangle \rightarrow  126^1;1^1\rangle \rightarrow$ | 0.257  | 0.00210  |
|                                  | -1543 | $ 0\rangle \rightarrow  125^1;1^1\rangle \rightarrow$ | 0.2591 | 0.00211  |
|                                  | -1516 | $ 0\rangle \rightarrow  126^1\rangle \rightarrow$     | 0.7279 | 0.00589  |
|                                  | -1515 | $ 0\rangle \rightarrow  125^1\rangle \rightarrow$     | 0.727  | 0.00589  |
|                                  | -1492 | $ 0\rangle \rightarrow  123^1\rangle \rightarrow$     | 0.2953 | 0.00238  |
|                                  | -1338 | $ 0\rangle \rightarrow  109^1\rangle \rightarrow$     | 0.425  | 0.00330  |
|                                  | -1338 | $ 0\rangle \rightarrow  108^1\rangle \rightarrow$     | 0.3925 | 0.00305  |
|                                  | -1185 | $ 0\rangle \rightarrow  99^1\rangle \rightarrow$      | 0.2999 | 0.00225  |
|                                  | -1184 | $ 0\rangle \rightarrow  98^1\rangle \rightarrow$      | 0.3087 | 0.00231  |
|                                  | -1061 | $ 0\rangle \rightarrow  87^1\rangle \rightarrow$      | 0.5676 | 0.00413  |
|                                  | -1052 | $ 0\rangle \rightarrow  85^1\rangle \rightarrow$      | 0.7147 | 0.00519  |
|                                  | -1049 | $ 0\rangle \rightarrow  83^1\rangle \rightarrow$      | 0.3949 | 0.00287  |
|                                  | -777  | $ 0\rangle \rightarrow  59^1\rangle \rightarrow$      | 0.4039 | 0.00276  |
|                                  | -691  | $ 0\rangle \rightarrow  52^1\rangle \rightarrow$      | 0.6384 | 0.00427  |
|                                  | -307  | $ 0\rangle \rightarrow  27^1\rangle \rightarrow$      | 0.8621 | 0.00529  |
|                                  | -289  | $ 0\rangle \rightarrow  26^1\rangle \rightarrow$      | 0.3832 | 0.00234  |
|                                  | -288  | $ 0\rangle \rightarrow  23^1;1^1\rangle \rightarrow$  | 0.447  | 0.00273  |
|                                  | -260  | $ 0\rangle \rightarrow  23^1\rangle \rightarrow$      | 1.366  | 0.00830  |
|                                  | -107  | $ 0\rangle \rightarrow  8^1;1^1\rangle \rightarrow$   | 0.475  | 0.00279  |
|                                  | -79   | $ 0\rangle \rightarrow  8^1\rangle \rightarrow$       | 1.341  | 0.00783  |
|                                  | -76   | $ 0\rangle \rightarrow  5^1;1^1\rangle \rightarrow$   | 0.4746 | 0.00277  |

|  |     |                                                     |        |         |
|--|-----|-----------------------------------------------------|--------|---------|
|  | -63 | $ 0\rangle \rightarrow  3^1;1^1\rangle \rightarrow$ | 0.5228 | 0.00304 |
|  | -56 | $ 0\rangle \rightarrow  1^2\rangle \rightarrow$     | 0.7668 | 0.00445 |
|  | -48 | $ 0\rangle \rightarrow  5^1\rangle \rightarrow$     | 1.251  | 0.00725 |
|  | -35 | $ 0\rangle \rightarrow  3^1\rangle \rightarrow$     | 1.475  | 0.00853 |
|  | -28 | $ 0\rangle \rightarrow  1^1\rangle \rightarrow$     | 3.837  | 0.02215 |
|  | 0   | $ 0\rangle \rightarrow  0\rangle \rightarrow$       | 10.76  | 0.06171 |

**Table S4.** Information on the dipole transitions in the vibrational spectra of the complexes calculated by the VH method, a dipole strength of 0.002 was used as a cut-off for the reported transitions.

| Complex | Energy / $\text{cm}^{-1}$ | Transition                                            | Intensity | Dipolar Strength |
|---------|---------------------------|-------------------------------------------------------|-----------|------------------|
| IrPic   | -1660                     | $ 0\rangle \rightarrow  135^1\rangle \rightarrow$     | 0.6501    | 0.003845         |
|         | -1508                     | $ 0\rangle \rightarrow  124^1\rangle \rightarrow$     | 0.3853    | 0.002205         |
|         | -1507                     | $ 0\rangle \rightarrow  123^1\rangle \rightarrow$     | 0.4104    | 0.002347         |
|         | -1071                     | $ 0\rangle \rightarrow  84^1;3^1\rangle \rightarrow$  | 0.4279    | 0.002228         |
|         | -1037                     | $ 0\rangle \rightarrow  84^1\rangle \rightarrow$      | 0.8824    | 0.004562         |
|         | -1032                     | $ 0\rangle \rightarrow  83^1\rangle \rightarrow$      | 0.7486    | 0.003867         |
|         | -797                      | $ 0\rangle \rightarrow  57^1;3^1\rangle \rightarrow$  | 0.451     | 0.002217         |
|         | -763                      | $ 0\rangle \rightarrow  57^1\rangle \rightarrow$      | 0.9561    | 0.004666         |
|         | -711                      | $ 0\rangle \rightarrow  48^1;3^1\rangle \rightarrow$  | 0.6512    | 0.003144         |
|         | -677                      | $ 0\rangle \rightarrow  48^1\rangle \rightarrow$      | 1.341     | 0.006427         |
|         | -311                      | $ 0\rangle \rightarrow  25^1\rangle \rightarrow$      | 0.4567    | 0.002030         |
|         | -260                      | $ 0\rangle \rightarrow  20^1\rangle \rightarrow$      | 0.846     | 0.003721         |
|         | -74                       | $ 0\rangle \rightarrow  4^1;3^1\rangle \rightarrow$   | 0.8346    | 0.003535         |
|         | -68                       | $ 0\rangle \rightarrow  3^2\rangle \rightarrow$       | 0.7522    | 0.003183         |
|         | -60                       | $ 0\rangle \rightarrow  3^1;1^1\rangle \rightarrow$   | 0.5844    | 0.002468         |
|         | -39                       | $ 0\rangle \rightarrow  4^1\rangle \rightarrow$       | 1.627     | 0.006845         |
|         | -34                       | $ 0\rangle \rightarrow  3^1\rangle \rightarrow$       | 3.05      | 0.012820         |
|         | -25                       | $ 0\rangle \rightarrow  1^1\rangle \rightarrow$       | 1.482     | 0.006216         |
|         | 0                         | $ 0\rangle \rightarrow  0\rangle \rightarrow$         | 6.24      | 0.026040         |
| C3      | -1049                     | $ 0\rangle \rightarrow  122^1;1^2\rangle \rightarrow$ | 0.5572    | 0.002923         |
|         | -1040                     | $ 0\rangle \rightarrow  122^1;1^1\rangle \rightarrow$ | 0.6421    | 0.003363         |
|         | -720                      | $ 0\rangle \rightarrow  80^1;1^2\rangle \rightarrow$  | 0.8301    | 0.004064         |
|         | -711                      | $ 0\rangle \rightarrow  80^1;1^1\rangle \rightarrow$  | 0.9584    | 0.004682         |
|         | -702                      | $ 0\rangle \rightarrow  80^1\rangle \rightarrow$      | 0.467     | 0.002277         |
|         | -75                       | $ 0\rangle \rightarrow  10^1;1^1\rangle \rightarrow$  | 0.53      | 0.002272         |
|         | -48                       | $ 0\rangle \rightarrow  5^1;1^2\rangle \rightarrow$   | 0.5667    | 0.002416         |
|         | -39                       | $ 0\rangle \rightarrow  5^1;1^1\rangle \rightarrow$   | 0.583     | 0.002481         |
|         | -28                       | $ 0\rangle \rightarrow  1^3\rangle \rightarrow$       | 1.286     | 0.005457         |
|         | -18                       | $ 0\rangle \rightarrow  1^2\rangle \rightarrow$       | 2.761     | 0.011700         |
|         | -9                        | $ 0\rangle \rightarrow  1^1\rangle \rightarrow$       | 3.177     | 0.013440         |
|         | 0                         | $ 0\rangle \rightarrow  0\rangle \rightarrow$         | 1.544     | 0.006519         |
| C4      | -61                       | $ 0\rangle \rightarrow  3^4\rangle \rightarrow$       | 0.5022    | 0.002324         |

|      |                                               |                                                       |          |          |
|------|-----------------------------------------------|-------------------------------------------------------|----------|----------|
|      | -46                                           | $ 0\rangle \rightarrow  3^3\rangle \rightarrow$       | 0.7343   | 0.003387 |
|      | -31                                           | $ 0\rangle \rightarrow  3^2\rangle \rightarrow$       | 1.015    | 0.004667 |
|      | -24                                           | $ 0\rangle \rightarrow  3^1;1^1\rangle \rightarrow$   | 0.6216   | 0.002855 |
|      | -22                                           | $ 0\rangle \rightarrow  2^1;1^1\rangle \rightarrow$   | 0.4845   | 0.002224 |
|      | -15                                           | $ 0\rangle \rightarrow  3^1\rangle \rightarrow$       | 1.178    | 0.005400 |
|      | -12                                           | $ 0\rangle \rightarrow  2^1\rangle \rightarrow$       | 0.452    | 0.002070 |
|      | -9                                            | $ 0\rangle \rightarrow  1^1\rangle \rightarrow$       | 1.103    | 0.005050 |
|      | 0                                             | $ 0\rangle \rightarrow  0\rangle \rightarrow$         | 1.344    | 0.006140 |
| N4   | -1651                                         | $ 0\rangle \rightarrow  191^1\rangle \rightarrow$     | 0.5296   | 0.003263 |
|      | -1509                                         | $ 0\rangle \rightarrow  180^1\rangle \rightarrow$     | 0.5347   | 0.003193 |
|      | -1352                                         | $ 0\rangle \rightarrow  158^1\rangle \rightarrow$     | 0.367    | 0.002118 |
|      | -1069                                         | $ 0\rangle \rightarrow  122^1;6^1\rangle \rightarrow$ | 0.4521   | 0.002453 |
|      | -1036                                         | $ 0\rangle \rightarrow  122^1\rangle \rightarrow$     | 0.8215   | 0.004427 |
|      | -812                                          | $ 0\rangle \rightarrow  95^1\rangle \rightarrow$      | 0.6271   | 0.003222 |
|      | -679                                          | $ 0\rangle \rightarrow  72^1\rangle \rightarrow$      | 0.6082   | 0.003038 |
|      | -65                                           | $ 0\rangle \rightarrow  6^2\rangle \rightarrow$       | 0.6062   | 0.002667 |
|      | -46                                           | $ 0\rangle \rightarrow  6^1;1^1\rangle \rightarrow$   | 0.662    | 0.002901 |
|      | -46                                           | $ 0\rangle \rightarrow  8^1\rangle \rightarrow$       | 0.4607   | 0.002019 |
|      | -33                                           | $ 0\rangle \rightarrow  6^1\rangle \rightarrow$       | 2.358    | 0.010310 |
|      | -30                                           | $ 0\rangle \rightarrow  5^1\rangle \rightarrow$       | 0.6016   | 0.002627 |
|      | -17                                           | $ 0\rangle \rightarrow  2^1\rangle \rightarrow$       | 0.4887   | 0.002129 |
|      | -14                                           | $ 0\rangle \rightarrow  1^1\rangle \rightarrow$       | 1.596    | 0.006949 |
|      | 0                                             | $ 0\rangle \rightarrow  0\rangle \rightarrow$         | 4.267    | 0.018530 |
| N5   | -1652                                         | $ 0\rangle \rightarrow  191^1\rangle \rightarrow$     | 0.8155   | 0.005056 |
|      | -1450                                         | $ 0\rangle \rightarrow  162^1\rangle \rightarrow$     | 0.5668   | 0.003361 |
|      | -1417                                         | $ 0\rangle \rightarrow  161^1\rangle \rightarrow$     | 0.3771   | 0.002220 |
|      | -1135                                         | $ 0\rangle \rightarrow  132^1\rangle \rightarrow$     | 0.3933   | 0.002177 |
|      | -1118                                         | $ 0\rangle \rightarrow  131^1\rangle \rightarrow$     | 0.3935   | 0.002171 |
|      | -1038                                         | $ 0\rangle \rightarrow  124^1\rangle \rightarrow$     | 0.5632   | 0.003054 |
|      | -831                                          | $ 0\rangle \rightarrow  93^1;8^1\rangle \rightarrow$  | 0.3914   | 0.002030 |
|      | -785                                          | $ 0\rangle \rightarrow  93^1\rangle \rightarrow$      | 1.378    | 0.007081 |
|      | -687                                          | $ 0\rangle \rightarrow  72^1\rangle \rightarrow$      | 0.7155   | 0.003600 |
|      | -646                                          | $ 0\rangle \rightarrow  69^1\rangle \rightarrow$      | 0.5063   | 0.002526 |
|      | -328                                          | $ 0\rangle \rightarrow  47^1\rangle \rightarrow$      | 0.4357   | 0.002034 |
|      | -258                                          | $ 0\rangle \rightarrow  40^1\rangle \rightarrow$      | 0.5342   | 0.002458 |
|      | -46                                           | $ 0\rangle \rightarrow  8^1\rangle \rightarrow$       | 1.783    | 0.007856 |
|      | -38                                           | $ 0\rangle \rightarrow  7^1\rangle \rightarrow$       | 1.002    | 0.004407 |
|      | -33                                           | $ 0\rangle \rightarrow  6^1\rangle \rightarrow$       | 1.381    | 0.006070 |
|      | -26                                           | $ 0\rangle \rightarrow  5^1\rangle \rightarrow$       | 1.045    | 0.004585 |
|      | -21                                           | $ 0\rangle \rightarrow  3^1\rangle \rightarrow$       | 0.9852   | 0.004318 |
| 0    | $ 0\rangle \rightarrow  0\rangle \rightarrow$ | 6.197                                                 | 0.027050 |          |
| C3N4 | -1522                                         | $ 0\rangle \rightarrow  237^1;2^1\rangle \rightarrow$ | 0.3311   | 0.002023 |
|      | -1355                                         | $ 0\rangle \rightarrow  202^1;2^1\rangle \rightarrow$ | 0.3614   | 0.002129 |
|      | -1051                                         | $ 0\rangle \rightarrow  161^1;2^2\rangle \rightarrow$ | 0.4157   | 0.002292 |



|      |                                               |                                                        |          |          |
|------|-----------------------------------------------|--------------------------------------------------------|----------|----------|
|      | -1042                                         | $ 0\rangle \rightarrow  161^1; 2^1\rangle \rightarrow$ | 0.6476   | 0.003564 |
|      | -1032                                         | $ 0\rangle \rightarrow  161^1\rangle \rightarrow$      | 0.398    | 0.002186 |
|      | -847                                          | $ 0\rangle \rightarrow  132^1; 2^1\rangle \rightarrow$ | 0.4101   | 0.002164 |
|      | -723                                          | $ 0\rangle \rightarrow  111^1; 2^2\rangle \rightarrow$ | 0.659    | 0.003387 |
|      | -714                                          | $ 0\rangle \rightarrow  111^1; 2^1\rangle \rightarrow$ | 1.028    | 0.005272 |
|      | -705                                          | $ 0\rangle \rightarrow  111^1\rangle \rightarrow$      | 0.6321   | 0.003237 |
|      | -28                                           | $ 0\rangle \rightarrow  2^3\rangle \rightarrow$        | 0.7161   | 0.003185 |
|      | -19                                           | $ 0\rangle \rightarrow  2^2\rangle \rightarrow$        | 2.348    | 0.010420 |
|      | -18                                           | $ 0\rangle \rightarrow  2^1; 1^1\rangle \rightarrow$   | 0.4697   | 0.002085 |
|      | -9                                            | $ 0\rangle \rightarrow  2^1\rangle \rightarrow$        | 3.648    | 0.016170 |
|      | 0                                             | $ 0\rangle \rightarrow  0\rangle \rightarrow$          | 2.237    | 0.009895 |
| C3N5 | -1651                                         | $ 0\rangle \rightarrow  247^1\rangle \rightarrow$      | 0.4324   | 0.002720 |
|      | -1631                                         | $ 0\rangle \rightarrow  244^1\rangle \rightarrow$      | 0.3553   | 0.002224 |
|      | -1450                                         | $ 0\rangle \rightarrow  207^1\rangle \rightarrow$      | 0.3665   | 0.002205 |
|      | -1141                                         | $ 0\rangle \rightarrow  172^1\rangle \rightarrow$      | 0.4582   | 0.002576 |
|      | -1038                                         | $ 0\rangle \rightarrow  161^1; 2^1\rangle \rightarrow$ | 0.3955   | 0.002175 |
|      | -1029                                         | $ 0\rangle \rightarrow  161^1\rangle \rightarrow$      | 0.6153   | 0.003377 |
|      | -825                                          | $ 0\rangle \rightarrow  129^1; 2^1\rangle \rightarrow$ | 0.4289   | 0.002253 |
|      | -816                                          | $ 0\rangle \rightarrow  129^1\rangle \rightarrow$      | 0.6709   | 0.003518 |
|      | -741                                          | $ 0\rangle \rightarrow  114^1\rangle \rightarrow$      | 0.4528   | 0.002337 |
|      | -19                                           | $ 0\rangle \rightarrow  2^2\rangle \rightarrow$        | 0.6849   | 0.003041 |
|      | -18                                           | $ 0\rangle \rightarrow  2^1; 1^1\rangle \rightarrow$   | 0.8111   | 0.003601 |
|      | -9                                            | $ 0\rangle \rightarrow  2^1\rangle \rightarrow$        | 2.595    | 0.011500 |
|      | -9                                            | $ 0\rangle \rightarrow  1^1\rangle \rightarrow$        | 1.522    | 0.006746 |
| 0    | $ 0\rangle \rightarrow  0\rangle \rightarrow$ | 4.03                                                   | 0.017830 |          |
| C4N4 | -1651                                         | $ 0\rangle \rightarrow  247^1\rangle \rightarrow$      | 0.2979   | 0.002138 |
|      | -1636                                         | $ 0\rangle \rightarrow  244^1\rangle \rightarrow$      | 0.2811   | 0.002011 |
|      | -1468                                         | $ 0\rangle \rightarrow  232^1\rangle \rightarrow$      | 0.2989   | 0.002057 |
|      | -991                                          | $ 0\rangle \rightarrow  157^1\rangle \rightarrow$      | 0.3912   | 0.002419 |
|      | -822                                          | $ 0\rangle \rightarrow  129^1\rangle \rightarrow$      | 0.5598   | 0.003334 |
|      | -707                                          | $ 0\rangle \rightarrow  111^1\rangle \rightarrow$      | 0.9409   | 0.005465 |
|      | -39                                           | $ 0\rangle \rightarrow  10^1\rangle \rightarrow$       | 1.024    | 0.005157 |
|      | -26                                           | $ 0\rangle \rightarrow  7^1\rangle \rightarrow$        | 0.9292   | 0.004664 |
|      | -12                                           | $ 0\rangle \rightarrow  1^1\rangle \rightarrow$        | 0.7627   | 0.003817 |
|      | 0                                             | $ 0\rangle \rightarrow  0\rangle \rightarrow$          | 4.464    | 0.022280 |
| C4N5 | -1652                                         | $ 0\rangle \rightarrow  244^1; 1^1\rangle \rightarrow$ | 0.283    | 0.002014 |
|      | -1650                                         | $ 0\rangle \rightarrow  247^1\rangle \rightarrow$      | 0.4583   | 0.003261 |
|      | -1637                                         | $ 0\rangle \rightarrow  244^1\rangle \rightarrow$      | 0.4684   | 0.003323 |
|      | -1445                                         | $ 0\rangle \rightarrow  207^1; 1^1\rangle \rightarrow$ | 0.5139   | 0.003489 |
|      | -1430                                         | $ 0\rangle \rightarrow  207^1\rangle \rightarrow$      | 0.8444   | 0.005713 |
|      | -1155                                         | $ 0\rangle \rightarrow  172^1; 1^1\rangle \rightarrow$ | 0.4596   | 0.002923 |
|      | -1140                                         | $ 0\rangle \rightarrow  172^1\rangle \rightarrow$      | 0.7535   | 0.004776 |
|      | -1139                                         | $ 0\rangle \rightarrow  171^1\rangle \rightarrow$      | 0.3328   | 0.002109 |
|      | -819                                          | $ 0\rangle \rightarrow  129^1; 1^1\rangle \rightarrow$ | 0.4303   | 0.002540 |

|  |      |                                                   |        |          |
|--|------|---------------------------------------------------|--------|----------|
|  | -804 | $ 0\rangle \rightarrow  129^1\rangle \rightarrow$ | 0.7112 | 0.004185 |
|  | -321 | $ 0\rangle \rightarrow  67^1\rangle \rightarrow$  | 0.5871 | 0.003113 |
|  | -244 | $ 0\rangle \rightarrow  58^1\rangle \rightarrow$  | 0.4828 | 0.002517 |
|  | -147 | $ 0\rangle \rightarrow  26^1\rangle \rightarrow$  | 0.5895 | 0.003012 |
|  | -36  | $ 0\rangle \rightarrow  9^1\rangle \rightarrow$   | 0.5417 | 0.002703 |
|  | -30  | $ 0\rangle \rightarrow  1^2\rangle \rightarrow$   | 0.8778 | 0.004375 |
|  | -15  | $ 0\rangle \rightarrow  1^1\rangle \rightarrow$   | 3.17   | 0.015750 |
|  | 0    | $ 0\rangle \rightarrow  0\rangle \rightarrow$     | 5.183  | 0.025670 |

**Table S5.** Selected vibrational modes for the ground state complexes in the vibrational calculations by the VH method, a vibrational intensity of 200 KM/mol is used as a cut-off for the reported vibrations.

| Complex | Mode | Frequency / $\text{cm}^{-1}$ | IR intensity / $\text{KMmol}^{-1}$ |
|---------|------|------------------------------|------------------------------------|
| IrPic   | 71   | 935.49                       | 200.2499                           |
|         | 79   | 1008.26                      | 314.4454                           |
|         | 94   | 1127.48                      | 322.5319                           |
|         | 103  | 1205.28                      | 331.7055                           |
|         | 114  | 1374.17                      | 382.188                            |
|         | 116  | 1418.56                      | 251.7772                           |
|         | 117  | 1440.76                      | 437.4632                           |
|         | 126  | 1514.9                       | 209.3839                           |
|         | 127  | 1529.33                      | 262.0755                           |
|         | 128  | 1561.81                      | 645.1789                           |
|         | 129  | 1562.68                      | 255.1247                           |
|         | 134  | 1642.25                      | 530.3205                           |
|         | 136  | 1667.7                       | 1168.156                           |
| C3      | 104  | 861.66                       | 224.6866                           |
|         | 107  | 865.75                       | 478.8404                           |
|         | 108  | 874.63                       | 557.5119                           |
|         | 113  | 958                          | 303.7302                           |
|         | 119  | 1013.17                      | 306.017                            |
|         | 159  | 1374.45                      | 384.3191                           |
|         | 160  | 1413.18                      | 281.2341                           |
|         | 163  | 1442.99                      | 475.1171                           |
|         | 182  | 1514.08                      | 211.4045                           |
|         | 184  | 1541.13                      | 637.5692                           |
|         | 190  | 1641.62                      | 583.4166                           |
|         | 192  | 1666.38                      | 1149.637                           |
| C4      | 93   | 773.42                       | 200.1132                           |
|         | 106  | 865.9                        | 646.2393                           |
|         | 107  | 872.75                       | 381.3585                           |
|         | 130  | 1104.83                      | 795.8017                           |
|         | 141  | 1201.94                      | 356.3131                           |
|         | 158  | 1367.6                       | 222.0828                           |

|             |         |          |          |
|-------------|---------|----------|----------|
|             | 159     | 1374.28  | 410.8153 |
|             | 162     | 1427.2   | 410.624  |
|             | 183     | 1530.24  | 378.2906 |
|             | 184     | 1548.58  | 702.2495 |
|             | 190     | 1641.92  | 593.8492 |
|             | 192     | 1665.35  | 1003.753 |
| <b>N4</b>   | 106     | 874.83   | 677.6044 |
|             | 159     | 1374     | 383.375  |
|             | 168     | 1458.23  | 218.5795 |
|             | 188     | 1640.59  | 237.7836 |
|             | 189     | 1643.62  | 279.2531 |
|             | 191     | 1650.8   | 316.7414 |
|             | 192     | 1669.9   | 973.256  |
| <b>N5</b>   | 103     | 861.51   | 668.7448 |
|             | 104     | 862.3    | 489.7969 |
|             | 107     | 873.1    | 398.3428 |
|             | 111     | 948.33   | 291.0672 |
|             | 134     | 1150     | 250.4396 |
|             | 141     | 1197.7   | 579.4761 |
|             | 158     | 1375.01  | 379.1891 |
|             | 162     | 1427.25  | 210.1452 |
|             | 180     | 1492.83  | 258.1653 |
|             | 183     | 1529.96  | 447.1626 |
|             | 185     | 1564.82  | 996.7995 |
|             | 191     | 1641.96  | 516.5704 |
|             | 192     | 1667.41  | 1115.184 |
| <b>C3N4</b> | 131     | 816.05   | 370.5343 |
|             | 138     | 856.84   | 231.3734 |
|             | 141     | 861.79   | 241.7848 |
|             | 142     | 862.04   | 315.3436 |
|             | 143     | 862.27   | 740.1618 |
|             | 145     | 867.03   | 230.3165 |
|             | 146     | 870.23   | 319.0033 |
|             | 148     | 875.59   | 703.4691 |
|             | 149     | 890.49   | 432.2064 |
|             | 155     | 956.76   | 288.7763 |
|             | 160     | 1018.17  | 530.8604 |
|             | 168     | 1091.3   | 414.4068 |
|             | 173     | 1152     | 668.4637 |
|             | 204     | 1375.37  | 458.8432 |
|             | 205     | 1416.42  | 390.9619 |
|             | 208     | 1446.25  | 463.9173 |
|             | 240     | 1530.22  | 855.5427 |
| 246         | 1641.71 | 594.0887 |          |

|             |         |          |          |
|-------------|---------|----------|----------|
|             | 248     | 1665.06  | 946.3764 |
| <b>C3N5</b> | 139     | 858.03   | 216.9392 |
|             | 140     | 859.17   | 1138.051 |
|             | 141     | 861.23   | 244.3628 |
|             | 142     | 861.42   | 202.9777 |
|             | 146     | 867.68   | 467.6328 |
|             | 149     | 877.84   | 677.3524 |
|             | 160     | 1019.17  | 300.6022 |
|             | 174     | 1168.07  | 267.7923 |
|             | 177     | 1186.29  | 227.5513 |
|             | 203     | 1374.14  | 439.2699 |
|             | 206     | 1416.77  | 223.9956 |
|             | 236     | 1484.49  | 349.9674 |
|             | 239     | 1523.55  | 209.16   |
|             | 240     | 1540.81  | 718.2158 |
|             | 246     | 1639.65  | 222.0842 |
| 247         | 1641.42 | 534.5761 |          |
| 248         | 1664.62 | 908.6639 |          |
| <b>C4N4</b> | 130     | 800.56   | 252.7033 |
|             | 144     | 866.4    | 583.3293 |
|             | 146     | 871.19   | 1073.887 |
|             | 147     | 873.46   | 273.5808 |
|             | 148     | 879.19   | 490.072  |
|             | 154     | 948.78   | 238.4885 |
|             | 167     | 1079.05  | 1282.784 |
|             | 179     | 1196.26  | 398.4768 |
|             | 203     | 1372.7   | 531.5166 |
|             | 204     | 1375.54  | 229.3786 |
|             | 207     | 1429.47  | 402.4787 |
|             | 239     | 1515.78  | 412.7118 |
|             | 240     | 1525.69  | 883.4048 |
|             | 242     | 1564.11  | 201.317  |
|             | 246     | 1641.56  | 662.9512 |
| 248         | 1664.29 | 1010.157 |          |
| <b>C4N5</b> | 142     | 862.25   | 410.3133 |
|             | 143     | 863.6    | 319.3598 |
|             | 144     | 866.15   | 259.9975 |
|             | 145     | 866.9    | 734.345  |
|             | 147     | 870.16   | 885.2174 |
|             | 153     | 964.47   | 270.4406 |
|             | 168     | 1106.55  | 715.0987 |
|             | 179     | 1203.03  | 625.7837 |
|             | 198     | 1323.08  | 240.4224 |
|             | 204     | 1376.07  | 260.0901 |

|  |     |         |          |
|--|-----|---------|----------|
|  | 208 | 1441.33 | 230.6644 |
|  | 239 | 1529.11 | 840.812  |
|  | 240 | 1549.99 | 681.6393 |
|  | 246 | 1638.8  | 250.1828 |
|  | 247 | 1641.68 | 593.8704 |
|  | 248 | 1664.9  | 959.3727 |

**Table S6.** Information on the dipole transitions in the vibrational spectra of the complexes with methyl groups replaced by hydrogen atoms calculated by the AH method, a dipole strength of 0.002 was used as a cut-off for the reported transitions.

| Complex | Energy / cm <sup>-1</sup>  | Transition                   | Intensity | Dipole Strength |
|---------|----------------------------|------------------------------|-----------|-----------------|
| IrPic   | -1654                      | 0> ->  134 <sup>1</sup> > -> | 0.4304    | 0.003364        |
|         | -1631                      | 0> ->  132 <sup>1</sup> > -> | 0.4101    | 0.003188        |
|         | -1628                      | 0> ->  131 <sup>1</sup> > -> | 0.3525    | 0.002738        |
|         | -1593                      | 0> ->  126 <sup>1</sup> > -> | 1.193     | 0.009191        |
|         | -1518                      | 0> ->  125 <sup>1</sup> > -> | 0.9161    | 0.006935        |
|         | -1515                      | 0> ->  124 <sup>1</sup> > -> | 0.7846    | 0.005937        |
|         | -1490                      | 0> ->  121 <sup>1</sup> > -> | 0.4273    | 0.003214        |
|         | -1347                      | 0> ->  113 <sup>1</sup> > -> | 0.3457    | 0.002516        |
|         | -1339                      | 0> ->  112 <sup>1</sup> > -> | 0.7636    | 0.005546        |
|         | -1186                      | 0> ->  100 <sup>1</sup> > -> | 0.5479    | 0.003842        |
|         | -1062                      | 0> ->  86 <sup>1</sup> > ->  | 0.8052    | 0.005488        |
|         | -1053                      | 0> ->  85 <sup>1</sup> > ->  | 0.6411    | 0.004361        |
|         | -1049                      | 0> ->  83 <sup>1</sup> > ->  | 0.3412    | 0.002319        |
|         | -779                       | 0> ->  60 <sup>1</sup> > ->  | 0.3207    | 0.002051        |
|         | -777                       | 0> ->  59 <sup>1</sup> > ->  | 0.4974    | 0.003180        |
|         | -691                       | 0> ->  49 <sup>1</sup> > ->  | 0.7451    | 0.004672        |
|         | -310                       | 0> ->  25 <sup>1</sup> > ->  | 1.329     | 0.007662        |
|         | -295                       | 0> ->  24 <sup>1</sup> > ->  | 0.5675    | 0.003261        |
|         | -259                       | 0> ->  20 <sup>1</sup> > ->  | 1.061     | 0.006052        |
|         | -223                       | 0> ->  19 <sup>1</sup> > ->  | 0.7834    | 0.004432        |
|         | -83                        | 0> ->  7 <sup>1</sup> > ->   | 1.468     | 0.008057        |
|         | -42                        | 0> ->  5 <sup>1</sup> > ->   | 1.95      | 0.010610        |
|         | -38                        | 0> ->  4 <sup>1</sup> > ->   | 0.6205    | 0.003373        |
|         | -34                        | 0> ->  3 <sup>1</sup> > ->   | 0.8908    | 0.004838        |
| -33     | 0> ->  2 <sup>1</sup> > -> | 0.3969                       | 0.002155  |                 |
| 0       | 0> ->  0> ->               | 11.8                         | 0.063610  |                 |
| C3      | -1560                      | 0> ->  140 <sup>1</sup> > -> | 1.777     | 0.013310        |
|         | -1346                      | 0> ->  127 <sup>1</sup> > -> | 1.003     | 0.007151        |
|         | -1044                      | 0> ->  96 <sup>1</sup> > ->  | 0.8789    | 0.005848        |
|         | -722                       | 0> ->  63 <sup>1</sup> > ->  | 1.418     | 0.008775        |
|         | -309                       | 0> ->  31 <sup>1</sup> > ->  | 0.9349    | 0.005286        |
|         | -92                        | 0> ->  12 <sup>1</sup> > ->  | 1.132     | 0.006106        |

|             |       |                                                   |          |          |
|-------------|-------|---------------------------------------------------|----------|----------|
|             | -39   | $ 0\rangle \rightarrow  7^1\rangle \rightarrow$   | 1.573    | 0.008389 |
|             | -29   | $ 0\rangle \rightarrow  3^1\rangle \rightarrow$   | 0.9522   | 0.005069 |
|             | 0     | $ 0\rangle \rightarrow  0\rangle \rightarrow$     | 12.05    | 0.063730 |
| <b>C4</b>   | 0     | $ 0\rangle \rightarrow  0\rangle \rightarrow$     | 1.427    | 0.008632 |
|             | -1565 | $ 0\rangle \rightarrow  141^1\rangle \rightarrow$ | 1.103    | 0.009521 |
|             | -1336 | $ 0\rangle \rightarrow  126^1\rangle \rightarrow$ | 0.7785   | 0.006365 |
| <b>N4</b>   | -79   | $ 0\rangle \rightarrow  9^1\rangle \rightarrow$   | 1.052    | 0.006442 |
|             | -34   | $ 0\rangle \rightarrow  5^1\rangle \rightarrow$   | 3.208    | 0.019460 |
|             | 0     | $ 0\rangle \rightarrow  0\rangle \rightarrow$     | 6.218    | 0.037430 |
|             | -321  | $ 0\rangle \rightarrow  33^1\rangle \rightarrow$  | 1.539    | 0.009755 |
| <b>N5</b>   | -54   | $ 0\rangle \rightarrow  9^1\rangle \rightarrow$   | 2.075    | 0.012400 |
|             | -31   | $ 0\rangle \rightarrow  3^1\rangle \rightarrow$   | 2.989    | 0.017760 |
|             | 0     | $ 0\rangle \rightarrow  0\rangle \rightarrow$     | 8.082    | 0.047710 |
|             | -1558 | $ 0\rangle \rightarrow  155^1\rangle \rightarrow$ | 0.844    | 0.007079 |
|             | -1558 | $ 0\rangle \rightarrow  154^1\rangle \rightarrow$ | 0.6588   | 0.005525 |
| <b>C3N4</b> | -1340 | $ 0\rangle \rightarrow  142^1\rangle \rightarrow$ | 0.7148   | 0.005693 |
|             | -79   | $ 0\rangle \rightarrow  12^1\rangle \rightarrow$  | 1.057    | 0.006313 |
|             | -21   | $ 0\rangle \rightarrow  3^1\rangle \rightarrow$   | 1.08     | 0.006373 |
|             | -19   | $ 0\rangle \rightarrow  2^1\rangle \rightarrow$   | 1.869    | 0.011020 |
|             | 0     | $ 0\rangle \rightarrow  0\rangle \rightarrow$     | 6.658    | 0.039090 |
|             | -1559 | $ 0\rangle \rightarrow  155^1\rangle \rightarrow$ | 1.375    | 0.011210 |
|             | -1520 | $ 0\rangle \rightarrow  152^1\rangle \rightarrow$ | 0.8472   | 0.006845 |
| <b>C3N5</b> | -1483 | $ 0\rangle \rightarrow  150^1\rangle \rightarrow$ | 0.8959   | 0.007175 |
|             | -92   | $ 0\rangle \rightarrow  16^1\rangle \rightarrow$  | 1.012    | 0.005907 |
|             | -50   | $ 0\rangle \rightarrow  11^1\rangle \rightarrow$  | 2.953    | 0.017070 |
|             | 0     | $ 0\rangle \rightarrow  0\rangle \rightarrow$     | 12.03    | 0.068790 |
| <b>C4N4</b> | 0     | $ 0\rangle \rightarrow  0\rangle \rightarrow$     | 4.67E-02 | 0.000312 |
| <b>C4N5</b> | -32   | $ 0\rangle \rightarrow  7^1\rangle \rightarrow$   | 1.311    | 0.008621 |
|             | 0     | $ 0\rangle \rightarrow  0\rangle \rightarrow$     | 2.829    | 0.018460 |

**Table S7.** Selected vibrational modes for the ground state complexes with methyl groups replaced by hydrogen atoms calculated by the AH method, a vibrational intensity of 200 KM/mol is used as a cut-off for the reported vibrations.

| Complex      | Mode | Frequency / $\text{cm}^{-1}$ | IR intensity / $\text{KMmol}^{-1}$ |
|--------------|------|------------------------------|------------------------------------|
| <b>IrPic</b> | 115  | 1374.78                      | 380.3607                           |
|              | 124  | 1515.35                      | 301.4648                           |
|              | 132  | 1631.24                      | 224.7082                           |
|              | 133  | 1641.43                      | 402.7128                           |
|              | 136  | 1665.91                      | 882.3079                           |
| <b>C3</b>    | 79   | 919.58                       | 894.076                            |
|              | 81   | 922.3                        | 728.8396                           |
|              | 129  | 1374.24                      | 384.5786                           |
|              | 138  | 1514.69                      | 253.4634                           |

|             |     |         |           |
|-------------|-----|---------|-----------|
|             | 145 | 1621.59 | 220.7478  |
|             | 146 | 1626.2  | 294.6527  |
|             | 147 | 1642.13 | 420.5083  |
|             | 150 | 1666.7  | 895.6113  |
|             | 151 | 2209.25 | 262.6201  |
|             | 152 | 2210.04 | 256.4958  |
|             | 153 | 2219.26 | 322.1661  |
|             | 154 | 2220.04 | 302.711   |
|             | 155 | 2233.18 | 241.3029  |
|             | 156 | 2234.26 | 212.4437  |
| <b>C4</b>   | 79  | 917.96  | 1161.7461 |
|             | 80  | 918.78  | 364.551   |
|             | 129 | 1374.23 | 383.1111  |
|             | 138 | 1509.81 | 289.869   |
|             | 147 | 1641.73 | 472.2918  |
|             | 150 | 1666.53 | 940.4743  |
|             | 151 | 2213.06 | 236.2249  |
|             | 152 | 2213.36 | 265.9622  |
|             | 153 | 2221.34 | 324.1569  |
|             | 154 | 2224.5  | 290.5834  |
|             | 155 | 2236.99 | 216.3094  |
|             | 156 | 2237.66 | 212.686   |
| <b>N4</b>   | 79  | 911.45  | 1485.028  |
|             | 129 | 1375.31 | 385.9434  |
|             | 146 | 1631.24 | 227.7983  |
|             | 147 | 1642.01 | 407.558   |
|             | 150 | 1666.69 | 905.2827  |
|             | 151 | 2240.85 | 205.8418  |
|             | 152 | 2240.97 | 206.7587  |
|             | 153 | 2243.6  | 411.2721  |
| <b>N5</b>   | 79  | 914.26  | 1065.1422 |
|             | 80  | 915.57  | 461.4642  |
|             | 129 | 1374.84 | 375.0039  |
|             | 138 | 1521.1  | 258.7699  |
|             | 146 | 1630.67 | 290.4187  |
|             | 147 | 1640.25 | 310.2636  |
|             | 149 | 1641.81 | 354.759   |
|             | 150 | 1666.44 | 874.1672  |
|             | 151 | 2235.27 | 217.6027  |
|             | 152 | 2236.12 | 215.4129  |
|             | 153 | 2240.03 | 319.802   |
|             | 154 | 2240.72 | 213.753   |
| <b>C3N4</b> | 89  | 910.72  | 946.5077  |
|             | 90  | 912.48  | 434.9295  |

|             |         |          |           |
|-------------|---------|----------|-----------|
|             | 91      | 920.19   | 1065.6968 |
|             | 94      | 924.21   | 665.569   |
|             | 143     | 1375.08  | 388.8649  |
|             | 159     | 1621.43  | 238.142   |
|             | 160     | 1626.07  | 293.8925  |
|             | 161     | 1642.33  | 406.0744  |
|             | 164     | 1667.37  | 934.0178  |
|             | 165     | 2209.74  | 259.1041  |
|             | 166     | 2210.58  | 254.5405  |
|             | 167     | 2219.61  | 327.0957  |
|             | 168     | 2220.38  | 301.1945  |
|             | 169     | 2233.74  | 237.6718  |
|             | 170     | 2234.68  | 208.8511  |
|             | 171     | 2241.52  | 205.0479  |
|             | 172     | 2242.12  | 204.5007  |
|             | 173     | 2244.23  | 322.5924  |
| <b>C3N5</b> | 67      | 676.41   | 212.9857  |
|             | 69      | 677.6    | 204.1776  |
|             | 89      | 913.56   | 1039.5225 |
|             | 90      | 914.94   | 702.7834  |
|             | 91      | 919.84   | 891.4996  |
|             | 92      | 922.73   | 519.4236  |
|             | 143     | 1373.77  | 376.6482  |
|             | 159     | 1621.33  | 271.1875  |
|             | 160     | 1625.82  | 346.5887  |
|             | 161     | 1640.36  | 326.1027  |
|             | 163     | 1642.16  | 349.9718  |
|             | 164     | 1667.2   | 905.2433  |
|             | 165     | 2210.12  | 258.1127  |
|             | 166     | 2211.26  | 255.1067  |
|             | 167     | 2219.92  | 329.0375  |
|             | 168     | 2221.07  | 310.2469  |
|             | 169     | 2234.08  | 234.7018  |
| 170         | 2235.18 | 208.9493 |           |
| 171         | 2236.34 | 216.2802 |           |
| 172         | 2237.1  | 213.9512 |           |
| 173         | 2241.17 | 354.378  |           |
| <b>C4N4</b> | 68      | 690.65   | 216.7252  |
|             | 89      | 911.32   | 1550.9041 |
|             | 91      | 917.93   | 730.9214  |
|             | 92      | 919.11   | 338.617   |
|             | 93      | 919.43   | 334.8885  |
|             | 143     | 1374.58  | 384.3943  |
|             | 161     | 1641.77  | 469.2848  |



|             |         |          |           |
|-------------|---------|----------|-----------|
|             | 164     | 1666.79  | 960.5006  |
|             | 165     | 2211.95  | 235.2165  |
|             | 166     | 2212.66  | 276.6705  |
|             | 167     | 2224.53  | 317.9918  |
|             | 168     | 2226.8   | 278.707   |
|             | 169     | 2236.25  | 225.0185  |
|             | 170     | 2236.82  | 221.149   |
|             | 171     | 2241.76  | 203.2658  |
|             | 172     | 2242.35  | 202.9785  |
|             | 173     | 2244.46  | 310.8429  |
| <b>C4N5</b> | 89      | 911.82   | 1529.9419 |
|             | 90      | 912.44   | 1478.4276 |
|             | 143     | 1374.56  | 379.7296  |
|             | 152     | 1514.85  | 212.7886  |
|             | 161     | 1639.86  | 293.2622  |
|             | 163     | 1641.99  | 387.4216  |
|             | 164     | 1667.12  | 941.7029  |
|             | 165     | 2213.87  | 257.0214  |
|             | 166     | 2214.9   | 244.8895  |
|             | 167     | 2222.57  | 308.3432  |
|             | 168     | 2223.57  | 325.6336  |
|             | 169     | 2236.11  | 226.5392  |
|             | 170     | 2237.37  | 209.8032  |
|             | 171     | 2237.62  | 219.9327  |
|             | 172     | 2238.6   | 230.4077  |
| 173         | 2240.99 | 280.7904 |           |
| 174         | 2241.93 | 211.9456 |           |

## References

1. Kim, C. Y.; Ha, D.-G.; Kang, H. H.; Yun, H.-J.; Kwon, S.-K.; Kim, J.-J.; Kim, Y.-H., *J. Mater. Chem.* **2012**, 22 (42).
2. Pavlishchuk, V. V.; Addison, A. W., *Inorg. Chim. Acta* **2000**, 298 (1), 97-102.
3. Gupta, D.; Katiyar, M.; Deepak; Hazra, T.; Verma, A.; Manoharan, S. S.; Biswas, A., *Opt. Mater.* **2006**, 28 (12), 1355-1361.
